# Supplementary material for: Global, regional and national trends in statin utilisation in high-income and low/middle-income countries, 2015–2020
Source: PubMed Central journal article supplement — BMJ Open. 2022 Sep 8;12(9):e061350. doi: 10.1136/bmjopen-2022-061350 (PMC9462115; doi:10.1136/bmjopen-2022-061350), 2022-09-08
Supplement: bmjopen-2022-061350.draft_revisions.pdf [file bmjopen-2022-061350.draft_revisions.pdf]

# BMJ Open

BMJ Open is committed to open peer review. As part of this commitment we make the peer review history of every article we publish publicly available.

When an article is published we post the peer reviewers' comments and the authors' responses online. We also post the versions of the paper that were used during peer review. These are the versions that the peer review comments apply to.

The versions of the paper that follow are the versions that were submitted during the peer review process. They are not the versions of record or the final published versions. They should not be cited or distributed as the published version of this manuscript.

BMJ Open is an open access journal and the full, final, typeset and author-corrected version of record of the manuscript is available on our site with no access controls, subscription charges or pay-per-view fees (<http://bmjopen.bmj.com>).

If you have any questions on BMJ Open's open peer review process please email [info.bmjopen@bmj.com](mailto:info.bmjopen@bmj.com)

# BMJ Open

## GLOBAL, REGIONAL, AND NATIONAL TRENDS IN STATIN UTILIZATION IN HIGH INCOME AND LOW- AND MIDDLE-INCOME COUNTRIES, 2015-2020

|                               |                                                                                                                                                                                                                                                                                                                                                       |
|-------------------------------|-------------------------------------------------------------------------------------------------------------------------------------------------------------------------------------------------------------------------------------------------------------------------------------------------------------------------------------------------------|
| Journal:                      | <i>BMJ Open</i>                                                                                                                                                                                                                                                                                                                                       |
| Manuscript ID                 | bmjopen-2022-061350                                                                                                                                                                                                                                                                                                                                   |
| Article Type:                 | Original research                                                                                                                                                                                                                                                                                                                                     |
| Date Submitted by the Author: | 25-Jan-2022                                                                                                                                                                                                                                                                                                                                           |
| Complete List of Authors:     | Guadamuz, Jenny; University of Southern California, School of Pharmacy<br>Shooshtari, Andrew; University of Southern California School of Pharmacy, Titus Family Department of Clinical Pharmacy<br>Qato, Dima; University of Southern California School of Pharmacy, Titus Family Department of Clinical Pharmacy; University of Southern California |
| Keywords:                     | PUBLIC HEALTH, Health policy < HEALTH SERVICES ADMINISTRATION & MANAGEMENT, Ischaemic heart disease < CARDIOLOGY                                                                                                                                                                                                                                      |
|                               |                                                                                                                                                                                                                                                                                                                                                       |

SCHOLARONE™  
Manuscripts

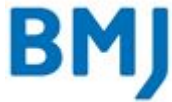

I, the Submitting Author has the right to grant and does grant on behalf of all authors of the Work (as defined in the below author licence), an exclusive licence and/or a non-exclusive licence for contributions from authors who are: i) UK Crown employees; ii) where BMJ has agreed a CC-BY licence shall apply, and/or iii) in accordance with the terms applicable for US Federal Government officers or employees acting as part of their official duties; on a worldwide, perpetual, irrevocable, royalty-free basis to BMJ Publishing Group Ltd ("BMJ") its licensees and where the relevant Journal is co-owned by BMJ to the co-owners of the Journal, to publish the Work in this journal and any other BMJ products and to exploit all rights, as set out in our [licence](#).

The Submitting Author accepts and understands that any supply made under these terms is made by BMJ to the Submitting Author unless you are acting as an employee on behalf of your employer or a postgraduate student of an affiliated institution which is paying any applicable article publishing charge ("APC") for Open Access articles. Where the Submitting Author wishes to make the Work available on an Open Access basis (and intends to pay the relevant APC), the terms of reuse of such Open Access shall be governed by a Creative Commons licence – details of these licences and which [Creative Commons](#) licence will apply to this Work are set out in our licence referred to above.

Other than as permitted in any relevant BMJ Author's Self Archiving Policies, I confirm this Work has not been accepted for publication elsewhere, is not being considered for publication elsewhere and does not duplicate material already published. I confirm all authors consent to publication of this Work and authorise the granting of this licence.

1  
2  
3 **GLOBAL, REGIONAL, AND NATIONAL TRENDS IN STATIN UTILIZATION IN**  
4 **HIGH INCOME AND LOW- AND MIDDLE-INCOME COUNTRIES, 2015-2020**  
5

6  
7 Jenny S. Guadamuz, PhD<sup>1-2</sup>  
8 Andrew Shooshtari<sup>1</sup>  
9 Dima M Qato, PharmD, MPH, PhD<sup>1-2</sup>  
10

- 11  
12  
13 1. Program on Medicines and Public Health, Titus Family Department of Clinical Pharmacy,  
14 University of Southern California School of Pharmacy, Los Angeles, California, USA  
15 2. Leonard D. Schaeffer Center for Health Policy and Economics, University of Southern  
16 California, Los Angeles, California, USA  
17  
18  
19  
20  
21  
22  
23  
24  
25  
26  
27  
28  
29  
30  
31  
32  
33  
34  
35  
36  
37  
38  
39  
40  
41

42 **Correspondence**

43 Dima M Qato, PharmD, MPH, PhD  
44 USC School of Pharmacy  
45 1985 Zonal Avenue  
46 Los Angeles, CA 90089  
47 Phone: (323) 442-1392  
48 Email: [qato@usc.edu](mailto:qato@usc.edu)  
49  
50  
51  
52  
53  
54

55 **Length** Text 2768; abstract 252; references 26, figures 3; tables 1; supplemental materials 2.  
56  
57  
58  
59  
60

## Abstract

### Background

Prior studies have reported inequitable global access to essential medicines for cardiovascular disease (CVD) prevention, especially statins. We examine recent trends and disparities in statin utilization at the income group, regional, and country levels.

### Methods

Pharmaceutical sales data was used to examine statin utilization in 41 high-income countries (HICs) and 50 low- and middle-income countries (LMICs) from 2015 to 2020. Utilization was measured using defined daily doses (DDD) per 1000 population  $\geq 40$  years per day (TPD). Fixed-effects panel regression analysis was used to examine associations between statin utilization and country-level factors.

### Findings

Globally, statin utilization increased 24.7% from 54.7 DDD/TPD in 2015 to 68.3 DDD/TPD in 2020. However, regional and income group disparities persisted during this period. In 2020, statin utilization was more than six-times higher in HICs than LMIC (192.4 vs. 28.4 DDD/TDP,  $p < 0.01$ ). Substantial disparities were also observed between LMICs, ranging from 3.1 DDDs/TDPs in West African nations to 225.0 DDD/TDP in Lebanon in 2020. While statin utilization increased in most LMIC between 2015 to 2020, several experienced declines in utilization, most notably Venezuela (-85.1%, from 92.3 to 14.0 DDD/TPD). In LMICs, every \$100 increase in per capita health spending was associated with a 17% increase in statin utilization, while every 10% increase in out-of-pocket health spending was associated with a 11% decline (both  $p < 0.05$ ).

### Interpretation

Despite global increases in statin utilization, there are substantial regional and country-level disparities between HIC and LMICs. To address global CVD disparities, policymakers should promote increased and equitable access to statins in LMICs.

## Strengths and Limitations

**Strength:** Pharmaceutical sales data was used to examine statin utilization in 41 high-income countries (HICs) and 50 low- and middle-income countries (LMICs). These countries represent approximately 90% of the global population older than 40 years of age.

### **Limitations:**

- Comparisons between regions, income groups, and countries should be interpreted in the context of the available data and total market coverage of the included countries.
- IQVIA does not provide sales data for most low-income countries; therefore, this study may underestimate the magnitude of statin utilization disparities between HICs and LMICs.
- Relationships between changes in statin utilization and country-level characteristics are not casual.

## INTRODUCTION

Cardiovascular disease (CVD)—primarily ischemic heart disease (IHD)—causes approximately one-third of deaths worldwide.<sup>1</sup> While age-standardized CVD mortality rates have declined globally, the number of deaths due to CVD has increased from 12.1 million in 1990 to 18.6 million in 2019<sup>1</sup> and substantial regional, income group, and country level disparities exist.<sup>2,3</sup> For example, age-standardized CVD mortality rates were lowest in high-income countries (HICs) in Asia-Pacific, Europe, and North America and highest in low- and middle-income countries (LMICs) in Eastern Europe, Middle East and North Africa, and South Asia.<sup>4</sup> Moreover, the CVD burden has increased in nearly every LMIC during the past three decades.<sup>1</sup> Currently, LMICs account for approximately 80% of global CVD deaths.<sup>2</sup>

Medicines, alongside lifestyle changes such as diet, exercise, and smoking cessation, are a cornerstone of CVD prevention.<sup>5</sup> Statins (HMG-CoA reductase inhibitors) are particularly important because they are widely recommended for primary and secondary prevention—that is, among adults with and without known CVD.<sup>5–7</sup> Statins have been included in the World Health Organization (WHO) Model Essential Medicines List (EML)—used to develop national EMLs that guide public procurement—since 2007.<sup>8</sup> Despite statins steadily losing patent protections throughout the world since 2006,<sup>8</sup> only 60% of LMICs include these medicines in their EMLs as of 2017.<sup>9</sup> As medicines included in EMLs have higher availability in the private and public sectors,<sup>10</sup> these policies—as well as differences in income, health spending, and disease burden—may result in global disparities in statin utilization.

While utilization of preventative cardiovascular medicines, including statins, has increased globally in the past decade, large disparities exist.<sup>11,12</sup> For example, a study using pharmaceutical sales data from 65 countries found that consumption of cardiovascular medicines was approximately six-times higher in HICs than in LMICs in 2018.<sup>11</sup> A separate study using sales data from 83 countries found that consumption of lipid-lowering medicines was at least three-times higher in HICs than in LMICs in 2018.<sup>12</sup> However, these studies do not focus on the population at greatest need, adults older than 40 years,<sup>6,7</sup> nor do they evaluate country-level factors associated with statin utilization. Furthermore, an updated analysis of statin utilization is imperative considering the ongoing COVID-19 pandemic that has caused severe disruptions to the pharmaceutical supply chain and the provision of healthcare.<sup>13–15</sup>

This study used global pharmaceutical sales data to estimate statin utilization per population aged 40 years and older in 91 countries from 2015 to 2020. Disparities across and within regions and income groups were examined over time, including in the six months prior to and following the start of the COVID-19 pandemic. To inform global efforts to improve access to essential medicines, we also examined the extent to which country-level factors, such as gross domestic product (GDP), health spending, and underlying IHD burden, are associated with statin utilization.

## Methods

### *Design and Data Sources*

We conducted a cross-sectional study examining trends and disparities in statin utilization in 91 countries using pharmaceutical sales data collected by IQVIA (Multinational Integrated Data

1  
2  
3 Analysis System, MIDAS) from January 2015 to October 2020. These countries represent  
4 approximately 90% of the global population older than 40 years of age.<sup>16</sup> IQVIA samples  
5 pharmaceutical sales from multiple distribution channels (e.g., manufacturers, wholesalers, and  
6 medical facilities) to develop nationally representative estimates of retail and non-retail  
7 pharmaceutical sales in each country.<sup>17</sup> If necessary, IQVIA projects its samples to represent  
8 100% of the retail and non-retail sales in each country and reports >90% global precision in  
9 recent years.<sup>17</sup> However, IQVIA does not publicly disclose detailed information on data  
10 collection, projection, and validation.  
11  
12

13  
14 Several sources were used to further characterize these countries. Countries were grouped based  
15 on their income and geographical regions per the World Bank (2020).<sup>18</sup> Population estimates and  
16 age-standardized IHD mortality rates were obtained from the Global Burden of Disease (GBD)  
17 (2015-2019).<sup>16</sup> Health expenditures (total, public, out-of-pocket) were also obtained from the  
18 World Bank (2015-2018).<sup>19</sup> We projected the values of these estimates through 2020 by applying  
19 the county-specific growth rates observed from 2015 to 2018 or 2019 (depending on data  
20 availability). Finally, whether statins were included in national essential medicine lists was  
21 determined, for reference, using the Global Essential Medicines database (2017).<sup>9</sup>  
22  
23

### 24 *Measuring Statin Utilization*

25 We extracted country-level dispensing for WHO Anatomic Therapeutic Chemical codes relating  
26 to statins (C10AA). As IQVIA does not report country-specific data for six countries in Centra  
27 America (Costa Rica, El Salvador, Guatemala, Honduras, Nicaragua, and Panama) and twelve  
28 countries in West Africa (Benin, Burkina Faso, Cameroon, Chad, Côte d'Ivoire, Democratic  
29 Republic of Congo, Gabon, Guinea, Mali, Niger, Senegal, and Togo), we examined these  
30 countries in aggregate. We examined total market data, or retail and non-retail statin sales, for 52  
31 countries (**eTable A**). In the 23 countries/groups that lack non-retail sector data, utilization was  
32 estimated by interpolation, using the ratio of statin consumption in the retail and non-retail  
33 sectors for other countries in their region for which data was available (85% of all statins were  
34 dispensed through the retail sector).  
35  
36

37  
38 To enable international comparisons over time, we converted statin sales (expressed in  
39 milligrams) into defined daily doses (DDD) using the Anatomical Therapeutic Chemical  
40 Classification System developed by the WHO Collaborating Centre for Drug Statistics  
41 Methodology.<sup>20</sup> To account for differences in population size and age distribution, we report  
42 statin utilization as DDDs per 1000 population  $\geq 40$  years per day (TPD) for each country.  
43 Global, regional, and income group statin utilizations in DDD/TPD were derived by aggregating  
44 statin sale and population estimates.  
45  
46

### 47 *Statistical Analysis*

48 Descriptive statistics were used to examine trends and disparities in statin utilization from 2015  
49 to 2020. Simple linear regressions were used to determine statistical significance in trends and  
50 disparities. Changes in statin utilization in the pre- (October 2019 to March 2020) and post-  
51 COVID-19 (April 2020 to October 2020) periods were also evaluated.  
52  
53

54 Fixed-effects panel regression analysis was used to quantify the association between economic  
55 and health indicators and the statin utilization from 2015 to 2020. Annual, country-level statin  
56  
57  
58  
59



utilization estimates were logged in these models to enable interpretation as percent change associated with each unit of the independent variables examined. The independent variables included time-varying health expenditure per capita, out-of-pocket health expenditure (as a percentage of total expenditure), and age-standardized IHD mortality rate. Errors were clustered by year and country to account for serial correlation.

All *p*-values are two-sided. STATA version 17.1 was used for all statistical analyses.

This study was considered exempt by the Institutional Review Board at the University of Southern California because this study was not considered human subjects research.

#### *Patient and public involvement*

No patient involved.

## RESULTS

As shown in **Figure 1**, global statin utilization increased 24.7% from 54.7 DDD/TPD in 2015 to 68.3 DDD/TPD ( $p<0.01$ ). While statin utilization increased, to varying degrees, in all regions and income groups (all  $p<0.05$ ), disparities persisted. In 2020, statin utilization was highest in North America and Europe (279.7 and 159.9 DDD/TPD, respectively) and substantially lower in Latin America, MENA, East Asia, South Asia, and sub-Saharan Africa (66.1, 64.1, 29.3, 16.1, and 24.7 DDD/TPD, respectively). From 2015 to 2020, statin utilization increased substantially in HICs (19.3% from 161.3 to 192.4 DDD/TPD) and LMICs (57.9% from 18.0 to 28.4 DDD/TPD). However, disparities by income group remained throughout this period—by 2020, statin utilization was seven times greater in HICs than in LMICs.

**Figure 2** depicts country-specific variation in statin utilization. From 2015 to 2020, statin utilization increased or remained stable in most HICs, except Singapore (125.2 to 95.0, -24.1%,  $p=0.27$ ), the United Arab Emirates (104.4 to 83.9, -19.7%,  $p=0.02$ ), Luxembourg (216.6 to 185.3, -14.4%,  $p<0.01$ ), and New Zealand (295.4 to 256.0, -13.4%,  $p=0.12$ ). HICs located in North America and Europe have substantially higher statin utilization than comparable countries located in other regions. For example, in 2020, statin utilization in HICs ranged from over 300 DDD/TPD in Denmark, Canada, and United Kingdom to less than 50 DDD/TPD in Japan, Chile, and Kuwait.

From 2015 to 2020, statin utilization increased by more than 10% in nearly all LMICs. Exceptions included India (12.9 to 14.1, 9.1%,  $p=0.02$ ), Malaysia (57.8 to 60.0, 3.9%,  $p=0.41$ ), Ecuador (20.2 to 20.9, 3.6%,  $p=0.09$ ), and Jordan (28.6 to 27.1, -5.4%,  $p=0.20$ ), where utilization remained relatively stable, and Venezuela, where utilization sharply declined (92.3 to 13.8, -85.1%,  $p<0.01$ ). Several LMICs had higher statin utilization than the global average in 2020, including Lebanon, Algeria, Brazil, Thailand, and South Africa (224.9, 111.8, 109.3, 96.8, and 85.4 DDD/TPD, respectively). Statin utilization is lower than 34 DDD/TPD (approximately half the global average) in 35 LMICs, including some of the most populous nations, such as China, India, Indonesia, Pakistan, Bangladesh, and Mexico.

**Table 1** presents factors associated with changes in statin utilization. In HICs, only health expenditure per capita was significantly and positively associated with statin utilization. In

LMICs, every \$100 increase in health expenditure per capita was associated with a 17% increase in utilization, while every 10% increase in out-of-pocket health expenditure (as percentage of total health expenditure) was associated with a 11% decline in utilization (both  $p < 0.05$ ). Greater rates of IHD mortality were also positively associated with more statin utilization in LMICs.

Compared with the pre-COVID-19 period, statin utilization declined by more than 5.0% in 41 countries, including 19 HICs and 22 LMICs (**Figure 3**). Severe disruptions in statin utilization—or  $\geq 10\%$  decline—were found in 13 HICs, including Australia (327.5 to 265.2 DDD/TPD, -19.0%), the United Arab Emirates (92.7 to 77.8 DDD/TPD, -16.1%), and Germany (180.6 to 160.6 DDD/TPD, -11.1%) (**eTable B**). Some of the most severe disruptions in statin utilization were observed among LMICs, including in Tunisia (76.5 to 52.7 DDD/TPD, -31.1%), Vietnam (23.3 to 17.2 DDD/TPD, -26.3%), Ukraine (32.1 to 26.1 DDD/TPD, -18.7%), and Mexico (28.4 to 23.8 DDD/TPD, -16.3%).

## DISCUSSION

Using a global database, representing approximately 90% of the global population older than 40 years of age,<sup>16</sup> we found persistent disparities across regions, income groups, and countries in statin utilization which may contribute to worsening disparities in CVD mortality. While global statin utilization has increased 25% from 2015 to 2020, statin utilization remains higher in the “global north” (e.g., North America, Europe, and Oceania) and in HICs than countries in other regions and LMICs.<sup>4</sup> In 2020, statin utilization was seventeen times higher in North America versus South Asia—the region with the highest age-adjusted CVD mortality rate in the world<sup>4</sup>—and seven times higher in HICs versus LMICs—that are experiencing a near universal increase in the number of CVD deaths.<sup>1</sup>

Statin utilization is also substantially lower in countries with disproportionately high age-standardized CVD mortality rates, namely LMICs in South Asia, MENA, and sub-Saharan Africa.<sup>4</sup> The WHO Global Non-Communicable Disease (NCD) Action Plan 2013-2020 aimed for a 25% reduction in premature deaths from NCD, especially CVD, from 2010 to 2025 by ensuring that at least half of adults at high CVD risk receive cardiovascular medicines and that 80% of public and private facilities have these essential medicines available on-site.<sup>21</sup> Growth in statin utilization in LMICs was concentrated among those countries with worsening IHD mortality—suggesting reactionary policies for the management of CVD morbidity and mortality versus preventative strategies for the provision of essential medicines. Together, our findings suggest that global efforts to reduce the burden of CVD need to be strengthened—statin utilization remains inequitable and suboptimal in LMICs, including those with worsening rates of CVD mortality.

Importantly, there is a substantial gap between CVD burden and statin utilization between HIC and LMICs. For example, statin utilization is very low (less than half the global average) in 70% of the LMICs examined, yet account for 68% of the global population of middle aged and older adults and 55% CVD deaths worldwide.<sup>16</sup> Forty-two percent of CVD deaths occur in China (25%), India (14%), and Indonesia (4%),<sup>16</sup> all of whom have very low statin utilization and together account for less than 11% of statins dispensed in the world. From 2015 to 2019, the IHD mortality rate has declined or remained stable in most LMICs, with notable exceptions of Bangladesh (5%), Malaysia (5%), and Venezuela (10%) that have experienced substantial

1  
2  
3 increases in recent years.<sup>16</sup> These countries, with worsening IHD mortality, have comparatively  
4 low statin utilization in given their regional and income group averages. However, Venezuela  
5 has also experienced substantial declines in statin utilization in this period—aggravating the IHD  
6 burden experienced by its populace.  
7

8  
9 Among LMICs, we found that every \$100 increase in per capita health spending was associated  
10 with a 17% increase in statin utilization and that every 10% increase in the proportion of out-of-  
11 pocket health spending was associated with an 11% decline. These findings suggest that policy  
12 efforts to address global disparities in statin utilization, may need to increase health spending  
13 while shifting the burden of health spending from individuals to the public sector (either via the  
14 direct provision of healthcare and medicines or via insurance schemes). Unfortunately, public  
15 investment in health (as measured by government health spending as a percentage of total  
16 expenditures) has declined in LMICs during the last two decades.<sup>22</sup> Only high-income and upper-  
17 middle countries have seen moderate increases in government health spending,<sup>22</sup> countries that  
18 consume a disproportionate share of statins. Out-of-pocket spending as a share of total health  
19 spending has remained stubbornly high in LMICs (above 40% and twice the percentage in HICs)  
20 during this period.<sup>22</sup> International aid—a major source of health spending in LMICs—is  
21 disproportionately directed to communicable diseases,<sup>22</sup> and these policies may aggravate global  
22 disparities in the use of essential medicines, including statins, and hinder efforts to reduce CVD  
23 mortality. International aid for health, which could alleviate costs of essential medicines for  
24 governments and the public, has also stagnated since 2013.<sup>22</sup>  
25  
26  
27

28 Economic or political crises, which are often followed by sharp declines in total health spending,  
29 may also impact access to essential medicines. The starkest example is Venezuela, where statin  
30 utilization declined 85% between 2015 to 2020. The ongoing sociopolitical crisis began in 2010  
31 and has spiraled into a sustained period of hyperinflation, a 75% decline in health spending, as  
32 well as widespread and chronic shortages of essential medicines in the past decade.<sup>19,23</sup>  
33  
34

35 Pharmaceutical supply chain disruptions have resulted from slowdowns in the production of  
36 medicines that impact domestic and international markets, transportation hurdles, and restrictions  
37 on movement (internationally and domestically and by providers and patients).<sup>24</sup> For example,  
38 early in the pandemic, active pharmaceutical ingredient production in China was severely  
39 curtailed—leading to shortages and delays in the production of medicines throughout the world,  
40 including in the United States, the European Union, and India.<sup>25</sup>  
41  
42

43 During the first six months of COVID-19 pandemic, statin utilization declined by more than 5%  
44 in 41 countries. As a whole, HICs experienced greater declines in statin utilization during the  
45 post-COVID-19 period (-2% versus -4% observed worldwide). Perhaps, because HICs had more  
46 severe restrictions on movement to mitigate COVID-19 spread than LMICs early in the  
47 pandemic.<sup>26</sup> However, the most severe disruptions in individual countries occurred in LMICs,  
48 which may be more vulnerable to supply chain disruptions. Several countries in Eastern Europe  
49 (*e.g.*, Serbia, Bosnia, Belarus, and Ukraine), Southeast Asia (*e.g.*, Thailand, Malaysia, the  
50 Philippines, Vietnam, and Indonesia), and MENA (*e.g.*, Tunisia and Jordan) saw dramatic  
51 declines in statin utilization, as did West Africa as a region and Mexico. Global COVID-19  
52 disparities, including inequitable access to vaccinations,<sup>26</sup> may result in persistent disruptions to  
53 statins access in LMICs, as countries prioritize acute health needs. If these trends continue, the  
54  
55  
56  
57  
58  
59  
60

1  
2  
3 COVID-19 pandemic may halt or reverse gains in statin utilization and worsen regional and  
4 country level CVD disparities between HIC and LMICs.  
5

### 6 7 *Limitations*

8 This study had several limitations. First, comparisons between regions, income groups, and  
9 countries should be interpreted in the context of the available data and total market coverage of  
10 the included countries. For example, IQVIA does not provide non-retail sales for 39 of the 91  
11 countries examined. However, 85% of all statins were dispensed through retail pharmacies, and  
12 we account for missing non-retail sales through interpolation (using the ratio of statin  
13 consumption in the retail and non-retail sectors for other countries in their region for which data  
14 was available). Second, IQVIA does not provide sales data for most low-income countries;  
15 therefore, this study may underestimate the magnitude of statin utilization disparities between  
16 HICs and LMICs. Finally, relationships between changes in statin utilization and country-level  
17 characteristics are not casual. However, the trends and disparities in statin utilization described in  
18 this study help evaluate the global progress in ensuring equitable access to essential medicines  
19 and inform efforts to reduce the global burden of CVD.  
20  
21

### 22 23 **Conclusion**

24 Despite a 25% increase in global statin utilization from 2015 to 2020, there are substantial and  
25 persistent regional and country-level disparities between HIC and LMICs. To address worsening  
26 CVD disparities, global, regional, and national policymakers should promote increased and  
27 equitable access to statins in LMICs.  
28  
29  
30  
31  
32  
33  
34  
35  
36  
37  
38  
39  
40  
41  
42  
43  
44  
45  
46  
47  
48  
49  
50  
51  
52  
53  
54  
55  
56  
57  
58  
59  
60

### Contributorship statements

- Guadamuz JS: Conceptualisation, data curation, formal analysis, methodology, validation, visualisation, software, writing – original draft, and writing – review & editing.
- Shooshtari A: Project administration and writing – original draft.
- Qato DM: Conceptualisation, funding acquisition, writing – original draft, and writing – review & editing

### Competing interests

Dr. Guadamuz current reports employment with Flatiron Health, Inc, which is an independent subsidiary of the Roche Group. Flatiron Health, Inc., had no role in the design and conduct of the study, analysis or interpretation of the data, and preparation, or final approval of the article before publication.

### Funding

Dr. Guadamuz was supported by the Robert Wood Johnson Foundation Health Policy Research Scholars program. Dr. Qato was supported by the Robert Wood Johnson Foundation Clinical Scholars program. Data obtained under license from IQVIA as part of IQVIA Institute's Human Data Science Research Collaborative in the Era of COVID-19. The funders, the Robert Wood Johnson Foundation, and IQVIA, had no role in the design and conduct of the study, analysis or interpretation of the data, and preparation, or final approval of the article before publication.

### Data sharing statement

Data for this study will not be made available due to licensing agreements with IQVIA.

## REFERENCES

- 1 Roth GA, Mensah GA, Johnson CO, *et al.* Global Burden of Cardiovascular Diseases and Risk Factors, 1990–2019. *J Am Coll Cardiol* 2020; **76**: 2982–3021.
- 2 Bowry ADK, Lewey J, Dugani SB, Choudhry NK. The Burden of Cardiovascular Disease in Low- and Middle-Income Countries : Epidemiology and Management. *Can J Cardiol* 2020; **31**: 1151–9.
- 3 Barquera S, Pedroza-Tobías A, Medina C, *et al.* Global Overview of the Epidemiology of Atherosclerotic Cardiovascular Disease. *Arch Med Res* 2015; **46**: 328–38.
- 4 Roth GA, Johnson C, Abajobir A, *et al.* Global, Regional, and National Burden of Cardiovascular Diseases for 10 Causes, 1990 to 2015. *J Am Coll Cardiol* 2017; **70**: 1–25.
- 5 World Health Organization. Prevention of Cardiovascular Disease: Guidelines for assessment and management of cardiovascular risk. 2007. [https://www.who.int/cardiovascular\\_diseases/guidelines](https://www.who.int/cardiovascular_diseases/guidelines) (accessed Oct 24, 2021).
- 6 Grundy SM, Stone NJ, Bailey AL *et al.* 2018 ACC/AHA/AACVPR/AAPA/ABC/ACPM/ADA/AGS/ APhA/ASPC/NLA/PCNA Guideline on the Management of Blood Cholesterol: A Report of the American College of Cardiology Foundation/American Heart Association Task Force on Clinical Practice Guidelines. *J Am Coll Cardiol* 2018.
- 7 Arnett DK, Blumenthal RS, Albert MA, *et al.* 2019 ACC/AHA Guideline on the Primary Prevention of Cardiovascular Disease: A Report of the American College of Cardiology/American Heart Association Task Force on Clinical Practice Guidelines. *Circulation* 2019; **140**: e596–646.
- 8 Kishore SP, Blank E, Heller DJ, *et al.* Modernizing the World Health Organization List of Essential Medicines for Preventing and Controlling Cardiovascular Diseases. *J Am Coll Cardiol* 2018; **71**: 564–74.
- 9 World Health Organization. Global Essential Medicine. 2019. <https://global.essentialmeds.org/> (accessed July 25, 2021).
- 10 Bazargani YT, Ewen M, de Boer A, Leufkens HGM, Mantel-Teeuwisse AK. Essential medicines are more available than other medicines around the globe. *PLoS One* 2014; **9**: e87576–e87576.
- 11 Yan VKC, Blais JE, Li X, *et al.* Trends in Cardiovascular Medicine Use in 65 Middle- and High-Income Countries. *J Am Coll Cardiol* 2021; **77**: 1021–3.
- 12 Blais JE, Wei Y, Yap KKW, *et al.* Trends in lipid-modifying agent use in 83 countries. *Atherosclerosis* 2021; **328**: 44–51.
- 13 Alexander GC, Qato DM. Ensuring Access to Medications in the US During the COVID-19 Pandemic. *JAMA* 2020; **324**: 31–2.
- 14 Lakavage A. Covid-19 has exposed cracks in the global medicines supply chain. Stat. 2020. <https://www.statnews.com/2020/06/02/covid-19-exposed-cracks-global-medicines-supply-chain/> (accessed Oct 24, 2021).
- 15 World Health Organization. COVID-19 continues to disrupt essential health services in 90% of countries. 2021. <https://www.who.int/news/item/23-04-2021-covid-19-continues-to-disrupt-essential-health-services-in-90-of-countries> (accessed Oct 24, 2021).
- 16 Institute for Health Metrics and Evaluation. Global Burden of Disease Study 2019. 2021. <http://www.healthdata.org/gbd> (accessed Dec 12, 2021).
- 17 IQVIA. Accuracy and Timeliness Statistics Annual Report, 2020. 2021.

- 1  
2  
3 <https://www.iqvia.com/library/publications/acts-2020> (accessed July 25, 2021).
- 4 18 World Bank Data. World Bank Country and Lending Groups. 2021.  
5 [https://datahelpdesk.worldbank.org/knowledgebase/articles/906519-world-bank-country-](https://datahelpdesk.worldbank.org/knowledgebase/articles/906519-world-bank-country-and-lending-groups)  
6 [and-lending-groups](https://datahelpdesk.worldbank.org/knowledgebase/articles/906519-world-bank-country-and-lending-groups) (accessed July 25, 2021).
- 7  
8 19 World Bank. World Bank Open Data. 2021. <https://data.worldbank.org/> (accessed July 25,  
9 2021).
- 10 20 WHO Collaborating Centre for Drug Statistics Methodology. Purpose of the ATC/DDD  
11 system. [https://www.whocc.no/atc\\_ddd\\_methodology/purpose\\_of\\_the\\_atc\\_ddd\\_system/](https://www.whocc.no/atc_ddd_methodology/purpose_of_the_atc_ddd_system/)  
12 (accessed April 6, 2020).
- 13 21 World Health Organization (WHO). Global Action Plan for the Prevention and Control of  
14 Noncommunicable Diseases 2013-2020. 2013. [https://www.who.int/publications-detail-](https://www.who.int/publications-detail-redirect/9789241506236)  
15 [redirect/9789241506236](https://www.who.int/publications-detail-redirect/9789241506236).
- 16 22 World Health Organization (WHO). Global spending on health: Weathering the storm.  
17 2020.
- 18 23 Raphelson S. Venezuela's Health Care System Ready To Collapse Amid Economic Crisis.  
19 NPR. 2018. [https://www.npr.org/2018/02/01/582469305/venezuelas-health-care-system-](https://www.npr.org/2018/02/01/582469305/venezuelas-health-care-system-ready-to-collapse-amid-economic-crisis)  
20 [ready-to-collapse-amid-economic-crisis](https://www.npr.org/2018/02/01/582469305/venezuelas-health-care-system-ready-to-collapse-amid-economic-crisis) (accessed Dec 26, 2021).
- 21 24 McDonell A, Chalkidou K, Yadav P, Rosen D. Understanding the Impact Of COVID-19  
22 On Essential Medicine Supply Chains. *Cent. Glob. Dev.* 2020.  
23 [https://www.cgdev.org/blog/understanding-impact-covid-19-essential-medicine-supply-](https://www.cgdev.org/blog/understanding-impact-covid-19-essential-medicine-supply-chains)  
24 [chains](https://www.cgdev.org/blog/understanding-impact-covid-19-essential-medicine-supply-chains) (accessed Dec 26, 2021).
- 25 25 Mullin R. COVID-19 is reshaping the pharmaceutical supply chain. *Chem Eng News*  
26 2020; **98**: 31–5.
- 27 26 Eyawo O, Viens AM, Ugoji UC. Lockdowns and low- and middle-income countries:  
28 building a feasible, effective, and ethical COVID-19 response strategy. *Global Health*  
29 2021; **17**: 1–5.
- 30  
31  
32  
33  
34  
35  
36  
37  
38  
39  
40  
41  
42  
43  
44  
45  
46  
47  
48  
49  
50  
51  
52  
53  
54  
55  
56  
57  
58  
59  
60

**Table 1.** Factors Associated with Statin Utilization, 2015 to 2020

|                                                 | Exponentiated Coefficient (CI) <sup>a</sup> |                                 |
|-------------------------------------------------|---------------------------------------------|---------------------------------|
|                                                 | High-income countries                       | Low-and middle-income countries |
| No. <sup>b</sup>                                | 40                                          | 33                              |
| Health expenditure per capita (\$) <sup>c</sup> | 1·01 (1·01, 1·02)*                          | 1·17 (1·12, 1·22)*              |
| OOP health expenditure (%) <sup>d</sup>         | 0·99 (0·91, 1·09)                           | 0·89 (0·82, 0·96)*              |
| IHD mortality rate <sup>e</sup>                 | 1·00 (0·99, 1·02)                           | 1·02 (1·01, 1·03)*              |

**Notes:** IHD=ischemic heart disease, OOP=out-of-pocket, No.=number.

**a** Statin utilization is defined as defined daily doses per 1000 population  $\geq 40$  y per day. Here logged statin utilization is examined. Data for 2020 is based on statin utilization from January to September 2020. **b** Countries in Central America and West Africa were excluded because IQVIA does not report country-specific information for these regions. **c** Increments of 100. **d** Increments of 10. **e** Age-standardized IHD mortality rate, increments of 10. \*  $p < 0·05$

## Figure Legends

### Figure 1. Statin Utilization by Geographical Region and Income, 2015 to 2020

**Notes:** DDD=defined daily doses; MENA=Middle East and North Africa; No.=number.

**a** All trends in statin utilization were statistically significant ( $p < 0·05$ ), per simple linear regression. **b** We captured statin utilization for 91 countries. **c** Based on data from January to September 2020

### Figure 2. Statin Utilization by Country, 2015 to 2020

**Notes:** DDD=defined daily doses; No.=number. Data for 2020 is based on statin utilization from January to September 2020. “Very low utilization” refers to utilization  $< \frac{1}{2}$  global statin utilization

### Figure 3. Change in Statin Utilization in Pre- and Post-COVID-19, October 2019 to September 2020

**Notes:** DDD=defined daily doses; No.=number. Pre-COVID-19 includes the period of October 2019 to March 2020 and post-COVID-19 includes the period of April 2020 to October 2020.



**Figure 1.** Statin Utilization by Geographical Region and Income, 2015 to 2020**a. By Region**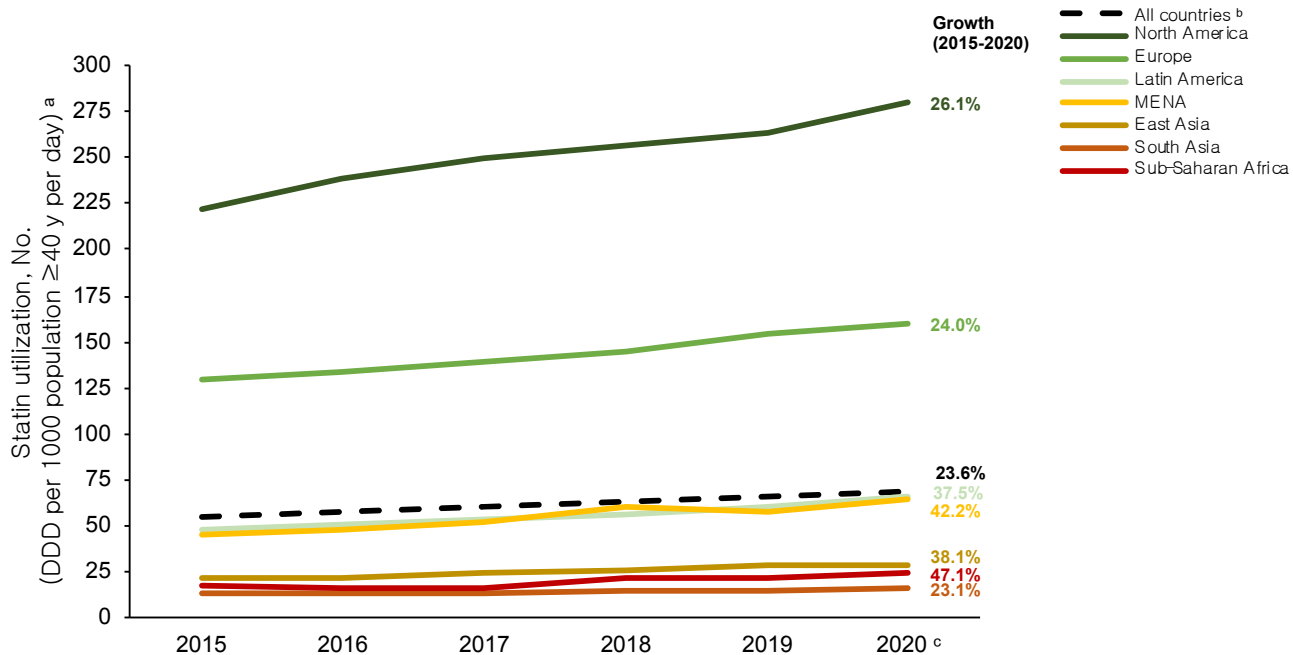**b. By Income**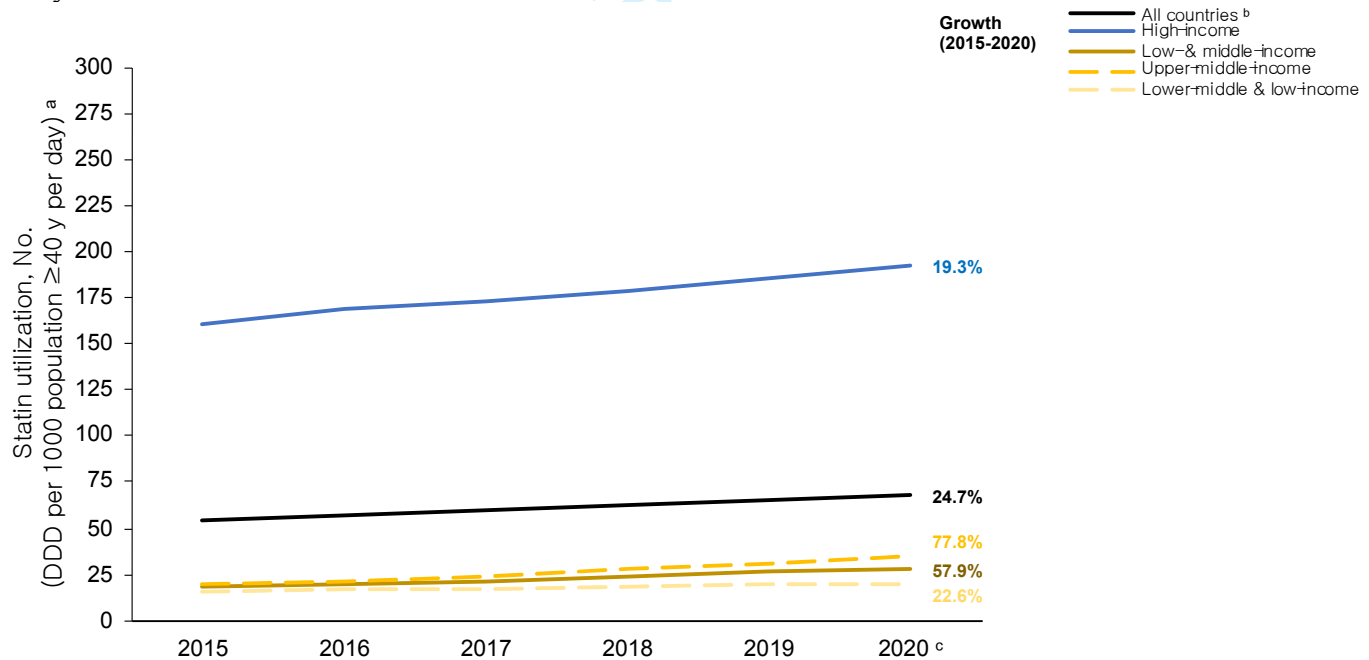

**Notes:** DDD=defined daily doses; MENA=Middle East and North Africa; No.=number.

**a** All trends in statin utilization were statistically significant ( $p<0.05$ ), per simple linear regression. **b** We captured statin utilization for 91 countries. **c** Based on data from January to September 2020.

**Figure 2. Statin Utilization by County, 2015 to 2020**

a. Change in statin utilization, 2015 to 2020

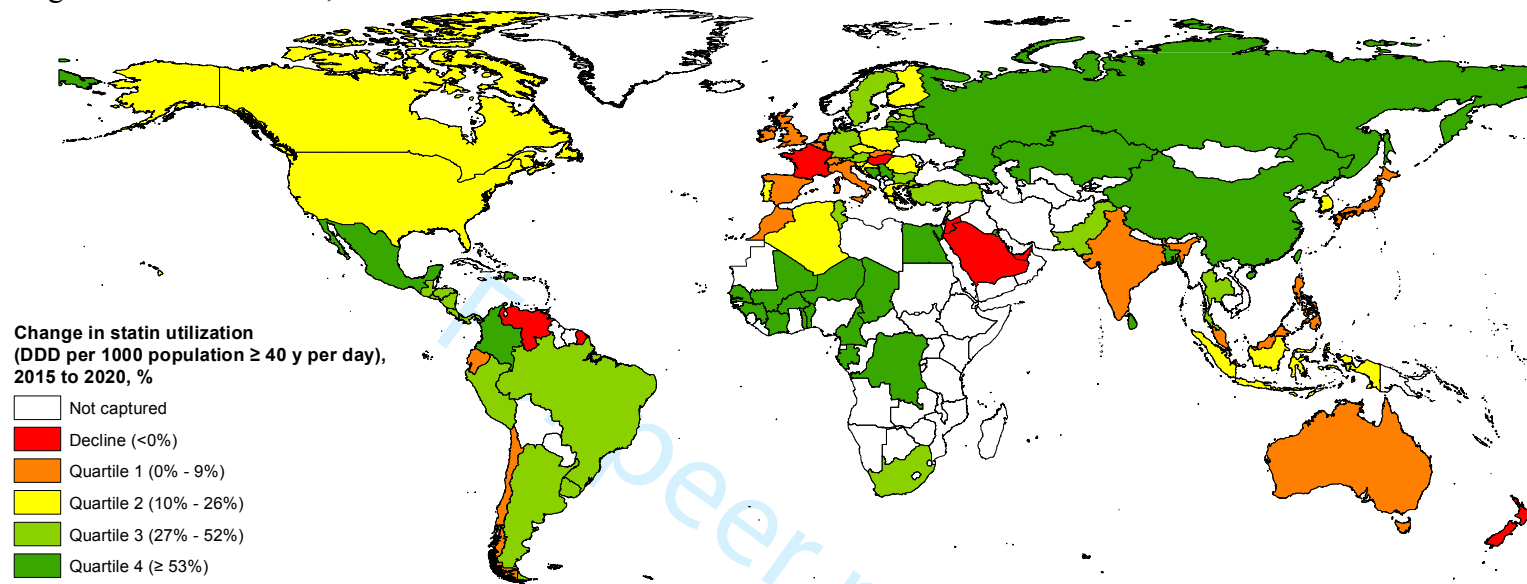

b. Statin utilization, 2020

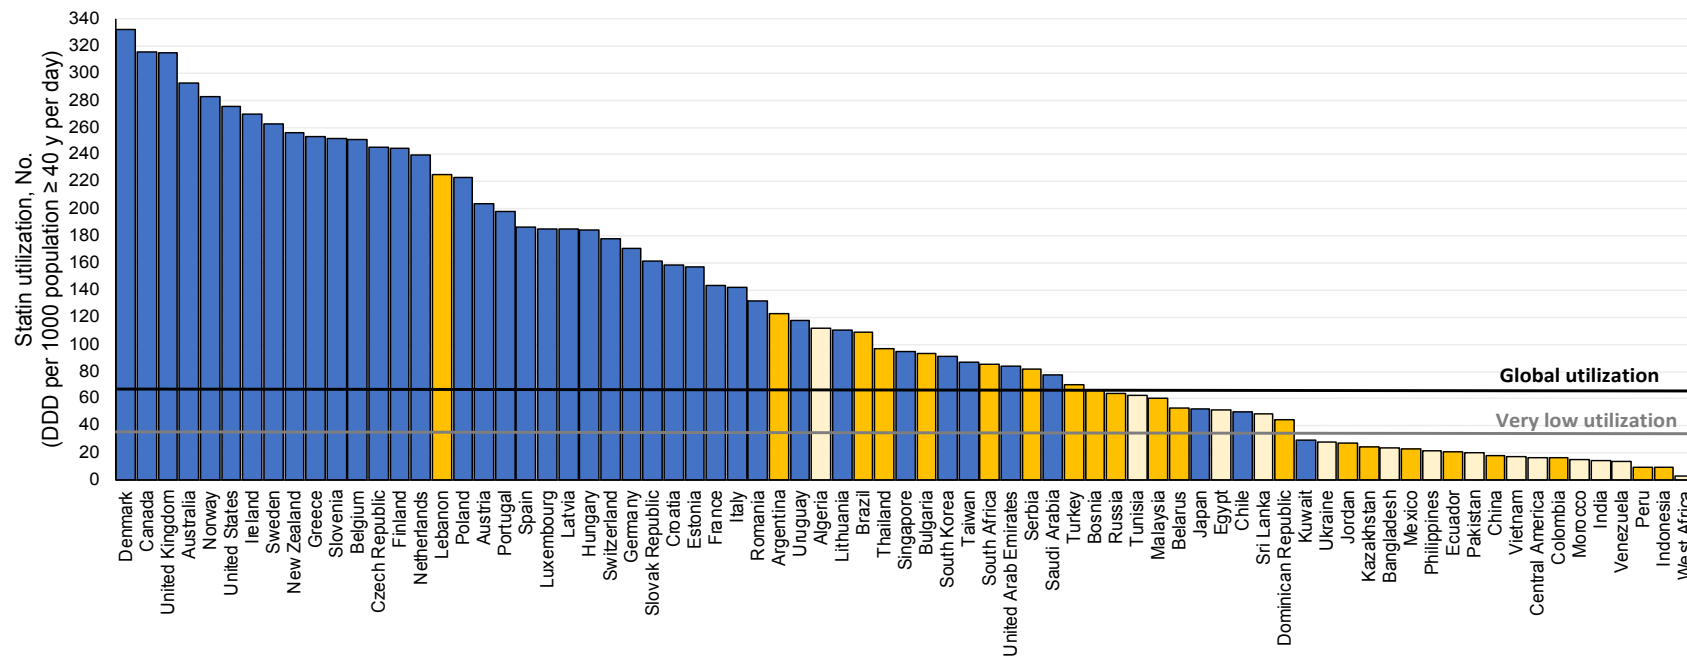

**Notes:** DDD=defined daily doses; No.=number. Data for 2020 is based on statin utilization from January to September 2020. “Very low utilization” refers to utilization < ½ global statin utilization.

**Figure 3.** Change in Statin Utilization in Pre- and Post-COVID-19, October 2019 to September 2020

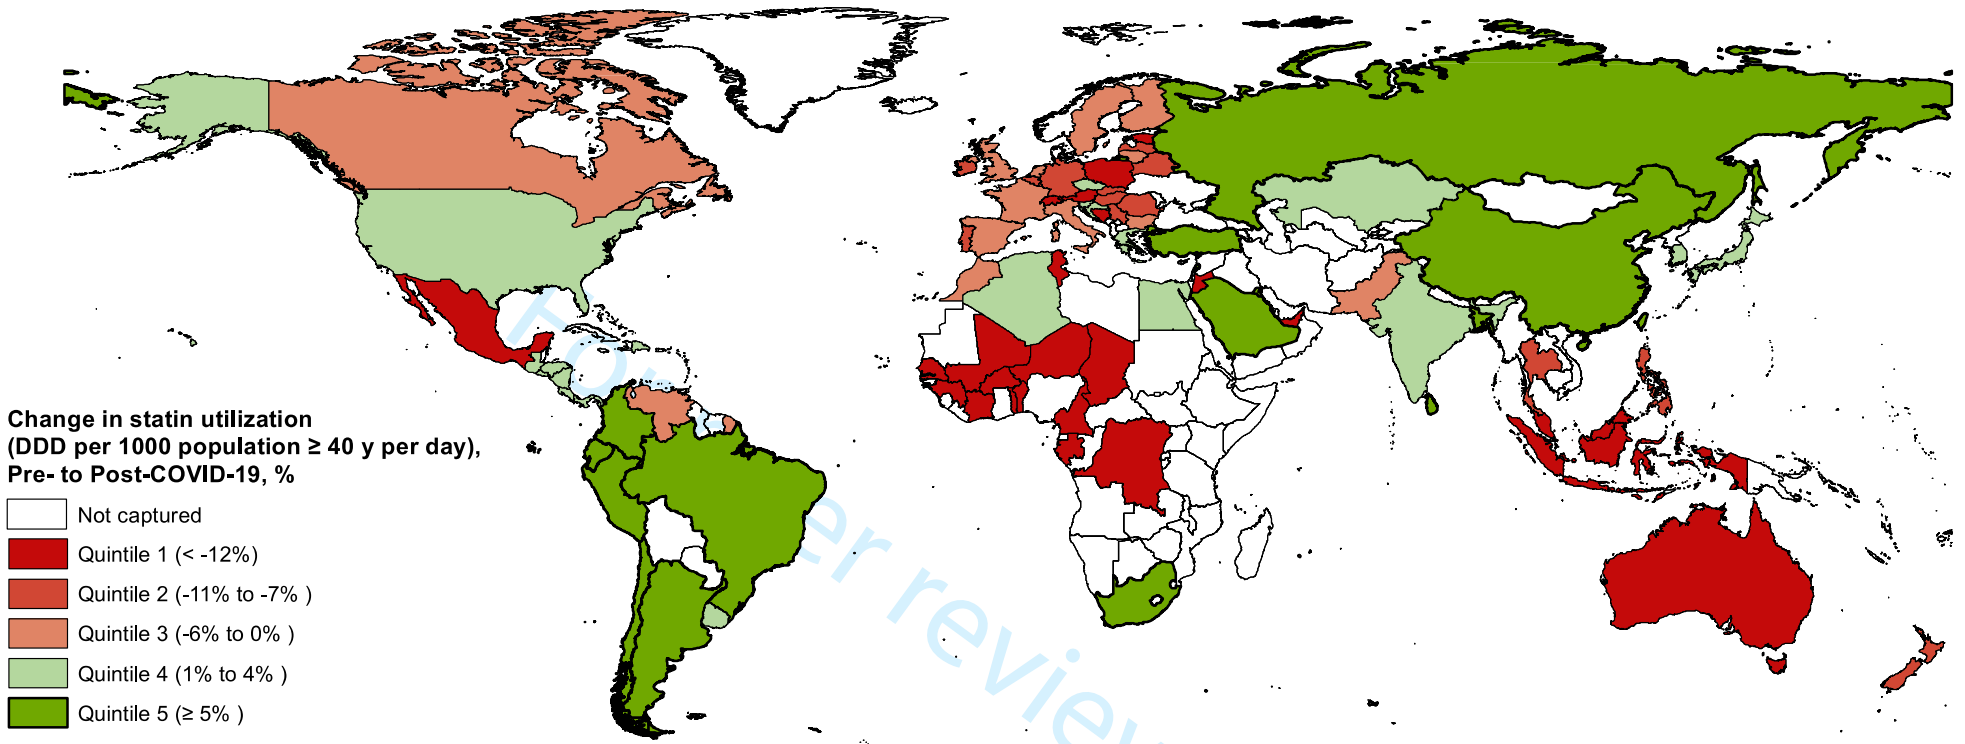

**Notes:** DDD=defined daily doses; No.=number. Pre-COVID-19 includes the period of October 2019 to March 2020 and post-COVID-19 includes the period of April 2020 to October 2020.

## ONLINE SUPPLEMENT

eTable A. Economic and Health Indicators of Countries Examined

|                              | Drug utilization data source <sup>a</sup> | Region <sup>b</sup> | Income (2020) <sup>b</sup> | GDP per capita (2020) <sup>b</sup> | Health expenditure per capita (2018) <sup>b</sup> | % of health expenditure <sup>b</sup> |     | Statins included in EML (2017) <sup>c</sup> | IHD mortality rate (2019) <sup>d</sup> |
|------------------------------|-------------------------------------------|---------------------|----------------------------|------------------------------------|---------------------------------------------------|--------------------------------------|-----|---------------------------------------------|----------------------------------------|
|                              |                                           |                     |                            |                                    |                                                   | Public                               | OOP |                                             |                                        |
| Australia                    | Total market                              | East Asia & Pacific | High                       | \$51,812                           | \$5,425                                           | 69                                   | 18  | -                                           | 56.1                                   |
| Japan                        | Total market                              | East Asia & Pacific | High                       | \$40,113                           | \$4,267                                           | 84                                   | 13  | -                                           | 29.9                                   |
| New Zealand                  | Total market                              | East Asia & Pacific | High                       | \$41,792                           | \$4,037                                           | 75                                   | 13  | -                                           | 75.0                                   |
| Singapore                    | Total market                              | East Asia & Pacific | High                       | \$59,798                           | \$2,824                                           | 50                                   | 31  | -                                           | 52.3                                   |
| South Korea                  | Total market                              | East Asia & Pacific | High                       | \$31,489                           | \$2,543                                           | 58                                   | 33  | -                                           | 35.0                                   |
| Taiwan                       | Total market                              | East Asia & Pacific | High <sup>e</sup>          | \$28,371 <sup>e</sup>              | \$1,882 <sup>e</sup>                              | -                                    | -   | -                                           | 41.2                                   |
| China                        | Total market                              | East Asia & Pacific | Upper middle               | \$10,500                           | \$501                                             | 56                                   | 36  | Yes                                         | 116.4                                  |
| Indonesia                    | Total market                              | East Asia & Pacific | Upper middle               | \$3,870                            | \$112                                             | 49                                   | 35  | Yes                                         | 140.3                                  |
| Malaysia                     | Total market                              | East Asia & Pacific | Upper middle               | \$10,402                           | \$427                                             | 51                                   | 35  | Yes                                         | 145.7                                  |
| Thailand                     | Total market                              | East Asia & Pacific | Upper middle               | \$7,189                            | \$276                                             | 76                                   | 11  | Yes                                         | 52.6                                   |
| Philippines                  | Total market                              | East Asia & Pacific | Lower middle               | \$3,299                            | \$137                                             | 33                                   | 54  | Yes                                         | 148.1                                  |
| Vietnam                      | Total market                              | East Asia & Pacific | Lower middle               | \$2,786                            | \$152                                             | 46                                   | 45  | Yes                                         | 95.6                                   |
| Austria                      | Total market                              | Europe              | High                       | \$48,105                           | \$5,326                                           | 73                                   | 18  | -                                           | 83.3                                   |
| Belgium                      | Total market                              | Europe              | High                       | \$44,594                           | \$4,913                                           | 76                                   | 19  | -                                           | 54.8                                   |
| Croatia                      | Total market                              | Europe              | High                       | \$13,828                           | \$1,014                                           | 83                                   | 10  | Yes                                         | 143.8                                  |
| Czech Republic               | Total market                              | Europe              | High                       | \$22,762                           | \$1,766                                           | 83                                   | 14  | Yes                                         | 149.0                                  |
| Denmark                      | Total market                              | Europe              | High                       | \$60,909                           | \$6,217                                           | 84                                   | 14  | -                                           | 55.6                                   |
| Estonia                      | Retail only                               | Europe              | High                       | \$23,312                           | \$1,553                                           | 74                                   | 25  | Yes                                         | 144.2                                  |
| Finland                      | Total market                              | Europe              | High                       | \$49,041                           | \$4,516                                           | 79                                   | 18  | -                                           | 100.6                                  |
| France                       | Total market                              | Europe              | High                       | \$38,625                           | \$4,690                                           | 73                                   | 9   | -                                           | 38.4                                   |
| Germany                      | Total market                              | Europe              | High                       | \$45,724                           | \$5,472                                           | 78                                   | 13  | -                                           | 81.4                                   |
| Greece                       | Retail only                               | Europe              | High                       | \$17,676                           | \$1,567                                           | 52                                   | 36  | -                                           | 91.9                                   |
| Hungary                      | Total market                              | Europe              | High                       | \$15,899                           | \$1,082                                           | 69                                   | 27  | -                                           | 174.6                                  |
| Ireland                      | Total market                              | Europe              | High                       | \$83,813                           | \$5,489                                           | 74                                   | 12  | -                                           | 74.7                                   |
| Italy                        | Total market                              | Europe              | High                       | \$31,676                           | \$2,989                                           | 74                                   | 24  | -                                           | 55.3                                   |
| Latvia                       | Total market                              | Europe              | High                       | \$17,620                           | \$1,101                                           | 60                                   | 39  | Yes                                         | 200.4                                  |
| Lithuania                    | Total market                              | Europe              | High                       | \$19,998                           | \$1,249                                           | 66                                   | 32  | Yes                                         | 222.9                                  |
| Luxembourg                   | Retail only                               | Europe              | High                       | \$115,874                          | \$6,227                                           | 85                                   | 10  | -                                           | 54.2                                   |
| Netherlands                  | Total market                              | Europe              | High                       | \$52,304                           | \$5,307                                           | 65                                   | 11  | -                                           | 47.4                                   |
| Norway                       | Total market                              | Europe              | High                       | \$67,294                           | \$8,239                                           | 85                                   | 14  | -                                           | 55.5                                   |
| Poland                       | Total market                              | Europe              | High                       | \$15,656                           | \$979                                             | 71                                   | 21  | Yes                                         | 130.3                                  |
| Portugal                     | Total market                              | Europe              | High                       | \$22,440                           | \$2,215                                           | 61                                   | 30  | Yes                                         | 45.8                                   |
| Romania                      | Total market                              | Europe              | High                       | \$12,896                           | \$687                                             | 80                                   | 19  | Yes                                         | 177.1                                  |
| Slovak Republic              | Total market                              | Europe              | High                       | \$19,157                           | \$1,300                                           | 79                                   | 19  | Yes                                         | 198.9                                  |
| Slovenia                     | Total market                              | Europe              | High                       | \$25,180                           | \$2,170                                           | 72                                   | 12  | Yes                                         | 59.0                                   |
| Spain                        | Total market                              | Europe              | High                       | \$27,057                           | \$2,736                                           | 70                                   | 22  | -                                           | 45.0                                   |
| Sweden                       | Total market                              | Europe              | High                       | \$51,926                           | \$5,982                                           | 85                                   | 14  | Yes                                         | 73.7                                   |
| Switzerland                  | Total market                              | Europe              | High                       | \$86,602                           | \$9,871                                           | 31                                   | 28  | -                                           | 55.7                                   |
| United Kingdom               | Total market                              | Europe              | High                       | \$40,285                           | \$4,315                                           | 79                                   | 17  | -                                           | 66.8                                   |
| Belarus                      | Total market                              | Europe              | Upper middle               | \$6,411                            | \$356                                             | 70                                   | 25  | Yes                                         | 334.2                                  |
| Bosnia & Herzegovina         | Total market                              | Europe              | Upper middle               | \$6,032                            | \$540                                             | 70                                   | 29  | Yes                                         | 162.9                                  |
| Bulgaria                     | Total market                              | Europe              | Upper middle               | \$9,976                            | \$690                                             | 58                                   | 41  | Yes                                         | 239.1                                  |
| Russia                       | Total market                              | Europe              | Upper middle               | \$10,127                           | \$609                                             | 59                                   | 38  | Yes                                         | 240.6                                  |
| Serbia                       | Total market                              | Europe              | Upper middle               | \$7,666                            | \$617                                             | 59                                   | 38  | Yes                                         | 204.4                                  |
| Ukraine                      | Total market                              | Europe              | Lower middle               | \$3,727                            | \$228                                             | 48                                   | 49  | Yes                                         | 424.2                                  |
| Chile                        | Retail only                               | Latin America       | High                       | \$13,232                           | \$1,456                                           | 51                                   | 33  | Yes                                         | 50.4                                   |
| Uruguay                      | Retail only                               | Latin America       | High                       | \$15,438                           | \$1,590                                           | 73                                   | 17  | Yes                                         | 67.0                                   |
| Argentina                    | Retail only                               | Latin America       | Upper middle               | \$8,442                            | \$1,128                                           | 61                                   | 28  | Yes                                         | 82.1                                   |
| Brazil                       | Total market                              | Latin America       | Upper middle               | \$6,797                            | \$848                                             | 42                                   | 28  | Yes                                         | 74.9                                   |
| Colombia                     | Retail only                               | Latin America       | Upper middle               | \$5,333                            | \$513                                             | 72                                   | 15  | Yes                                         | 75.3                                   |
| Dominican Republic           | Total market                              | Latin America       | Upper middle               | \$7,268                            | \$462                                             | 44                                   | 45  | Yes                                         | 175.6                                  |
| Ecuador                      | Retail only                               | Latin America       | Upper middle               | \$5,600                            | \$516                                             | 52                                   | 40  | Yes                                         | 81.8                                   |
| Mexico                       | Retail only                               | Latin America       | Upper middle               | \$8,347                            | \$520                                             | 50                                   | 42  | Yes                                         | 100.0                                  |
| Peru                         | Retail only                               | Latin America       | Upper middle               | \$6,127                            | \$369                                             | 63                                   | 29  | Yes                                         | 48.7                                   |
| Venezuela                    | Retail only                               | Latin America       | Lower middle <sup>f</sup>  | \$1,739 <sup>f</sup>               | \$257                                             | 48                                   | 38  | Yes                                         | 130.0                                  |
| Central America <sup>g</sup> | Retail only                               |                     |                            |                                    |                                                   |                                      |     |                                             |                                        |
| Panama                       |                                           | Latin America       | High                       | \$12,269                           | \$1,132                                           | 64                                   | 29  | Yes                                         | 58.2                                   |
| Costa Rica                   |                                           | Latin America       | Upper middle               | \$12,077                           | \$910                                             | 72                                   | 22  | Yes                                         | 71.5                                   |
| Guatemala                    |                                           | Latin America       | Upper middle               | \$4,603                            | \$260                                             | 36                                   | 58  | Yes                                         | 106.3                                  |
| El Salvador                  |                                           | Latin America       | Lower middle               | \$3,799                            | \$289                                             | 64                                   | 29  | Yes                                         | 100.4                                  |
| Honduras                     |                                           | Latin America       | Lower middle               | \$2,406                            | \$176                                             | 40                                   | 51  | Yes                                         | 154.8                                  |
| Nicaragua                    |                                           | Latin America       | Lower middle               | \$1,905                            | \$174                                             | 60                                   | 33  | Yes                                         | 148.3                                  |

**eTable A (continued).** Economic and Health Indicators of Countries Examined

|                                  | Drug utilization data source <sup>a</sup> | Region <sup>b</sup> | Income (2020) <sup>b</sup> | GDP per capita (2020) <sup>b</sup> | Health expenditure per capita (2018) <sup>b</sup> | % of health expenditure <sup>b</sup> |     | Statins included in EML (2017) <sup>c</sup> | IHD mortality rate (2019) <sup>d</sup> |
|----------------------------------|-------------------------------------------|---------------------|----------------------------|------------------------------------|---------------------------------------------------|--------------------------------------|-----|---------------------------------------------|----------------------------------------|
|                                  |                                           |                     |                            |                                    |                                                   | Public                               | OOP |                                             |                                        |
| Kuwait                           | Retail only                               | MENA                | High                       | \$32,373                           | \$1,711                                           | 88                                   | 11  | -                                           | 108.5                                  |
| Saudi Arabia                     | Total market                              | MENA                | High                       | \$20,110                           | \$1,485                                           | 62                                   | 14  | -                                           | 205.6                                  |
| United Arab Emirates             | Retail only                               | MENA                | High                       | \$43,103                           | \$1,817                                           | 52                                   | 13  | -                                           | 175.4                                  |
| Algeria                          | Retail only                               | MENA                | Lower middle               | \$3,310                            | \$256                                             | 66                                   | 33  | Yes                                         | 237.3                                  |
| Egypt                            | Retail only                               | MENA                | Lower middle               | \$3,548                            | \$126                                             | 29                                   | 62  | Yes                                         | 359.3                                  |
| Morocco                          | Retail only                               | MENA                | Lower middle               | \$3,009                            | \$175                                             | 40                                   | 47  | Yes                                         | 278.5                                  |
| Tunisia                          | Total market                              | MENA                | Lower middle               | \$3,320                            | \$252                                             | 57                                   | 39  | Yes                                         | 193.5                                  |
| Jordan                           | Retail only                               | MENA                | Upper middle               | \$4,283                            | \$330                                             | 49                                   | 31  | Yes                                         | 121.9                                  |
| Kazakhstan                       | Total market                              | MENA                | Upper middle               | \$9,056                            | \$276                                             | 61                                   | 33  | -                                           | 251.4                                  |
| Lebanon                          | Retail only                               | MENA                | Upper middle               | \$4,891                            | \$686                                             | 50                                   | 33  | Yes                                         | 241.2                                  |
| Turkey                           | Total market                              | MENA                | Upper middle               | \$8,538                            | \$390                                             | 77                                   | 17  | -                                           | 121.0                                  |
| Canada                           | Total market                              | North America       | High                       | \$43,242                           | \$4,995                                           | 73                                   | 15  | No                                          | 63.9                                   |
| United States                    | Total market                              | North America       | High                       | \$63,544                           | \$10,624                                          | 50                                   | 11  | -                                           | 91.0                                   |
| Bangladesh                       | Retail only                               | South Asia          | Lower middle               | \$1,969                            | \$42                                              | 17                                   | 74  | No                                          | 111.2                                  |
| India                            | Total market                              | South Asia          | Lower middle               | \$1,901                            | \$73                                              | 27                                   | 63  | Yes                                         | 150.5                                  |
| Pakistan                         | Retail only                               | South Asia          | Lower middle               | \$1,194                            | \$43                                              | 36                                   | 56  | Yes                                         | 189.3                                  |
| Sri Lanka                        | Retail only                               | South Asia          | Lower middle               | \$3,682                            | \$157                                             | 41                                   | 51  | Yes                                         | 109.0                                  |
| South Africa                     | Total market                              | Sub-Saharan Africa  | Upper middle               | \$5,091                            | \$526                                             | 54                                   | 8   | Yes                                         | 81.4                                   |
| West Africa <sup>g</sup>         | Retail only                               |                     |                            |                                    |                                                   |                                      |     |                                             |                                        |
| Gabon                            |                                           | Sub-Saharan Africa  | Upper middle               | \$7,006                            | \$218                                             | 59                                   | 23  | -                                           | 117.4                                  |
| Benin                            |                                           | Sub-Saharan Africa  | Lower middle               | \$1,291                            | \$31                                              | 20                                   | 45  | -                                           | 113.1                                  |
| Cameroon                         |                                           | Sub-Saharan Africa  | Lower middle               | \$1,499                            | \$54                                              | 6                                    | 76  | -                                           | 115.5                                  |
| Côte d'Ivoire                    |                                           | Sub-Saharan Africa  | Lower middle               | \$2,326                            | \$72                                              | 29                                   | 39  | -                                           | 122.0                                  |
| Senegal                          |                                           | Sub-Saharan Africa  | Lower middle               | \$1,488                            | \$59                                              | 24                                   | 56  | -                                           | 117.6                                  |
| Burkina Faso                     |                                           | Sub-Saharan Africa  | Low                        | \$831                              | \$40                                              | 43                                   | 36  | -                                           | 130.2                                  |
| Chad                             |                                           | Sub-Saharan Africa  | Low                        | \$614                              | \$29                                              | 17                                   | 62  | -                                           | 120.1                                  |
| Democratic Republic of the Congo |                                           | Sub-Saharan Africa  | Low                        | \$557                              | \$19                                              | 15                                   | 42  | -                                           | 114.7                                  |
| Guinea                           |                                           | Sub-Saharan Africa  | Low                        | \$1,194                            | \$38                                              | 16                                   | 61  | -                                           | 123.7                                  |
| Mali                             |                                           | Sub-Saharan Africa  | Low                        | \$859                              | \$35                                              | 28                                   | 34  | -                                           | 116.0                                  |
| Niger                            |                                           | Sub-Saharan Africa  | Low                        | \$565                              | \$30                                              | 33                                   | 49  | -                                           | 118.1                                  |
| Togo                             |                                           | Sub-Saharan Africa  | Low                        | \$915                              | \$42                                              | 17                                   | 56  | -                                           | 134.9                                  |

**Notes:** EML=essential medicines list, IHD=ischemic heart disease, MENA=Middle East and North Africa, OOP=out-of-pocket.

**a** Based on “sell-in” data or the volume purchased by retail (*e.g.*, pharmacies) or non-retail (*e.g.*, hospitals) sectors. As an exception, we used “sell-out” data, or the volume dispensed to patients, in the United Kingdom. We present data on the total market, or retail and non-retail drug sales, for 52 countries. In the 39 countries lacking non-retail sector data, utilization was estimated by interpolation, using the ratio of statin consumption in the retail and non-retail sectors for other countries in their region for which data was available. In 2020, 85% of statins were dispensed via retail sectors (based on countries with data for retail and non-retail sectors). **b** World Bank. **c** World Health Organization. **d** Global Burden Disease, age-standardized IHD mortality rate. **e** Republic of China (Taiwan), Statistical Bureau. **f** Australian Department of Foreign Affairs & Trade, Venezuela Fact Sheet. **g** IQVIA does not provide country specific utilization for this region.

**eTable B.** Statin Utilization in Pre- and Post-COVID-19, October 2019 to September 2020

| <i>Countries/Regions</i> <sup>b</sup> | Statin utilization, No.<br>(DDD per 1000 population ≥ 40 y) <sup>a</sup> |                                   |             |              |
|---------------------------------------|--------------------------------------------------------------------------|-----------------------------------|-------------|--------------|
|                                       | Pre-COVID-19<br>(10/19 to 03/20)                                         | Post-COVID-19<br>(04/20 to 09/20) | <i>p</i>    | Growth,<br>% |
|                                       | Denmark                                                                  | 331.7                             | 326.1       | 0.73         |
| Canada                                | 322.9                                                                    | 314.3                             | 0.68        | -2.7         |
| United Kingdom                        | 324.5                                                                    | 308.8                             | 0.14        | -4.8         |
| <b>Australia</b>                      | <b>327.5</b>                                                             | <b>265.2</b>                      | <b>0.26</b> | <b>-19.0</b> |
| <b>Norway</b>                         | <b>304.7</b>                                                             | <b>274.4</b>                      | <b>0.26</b> | <b>-9.9</b>  |
| United States                         | 271.6                                                                    | 271.2                             | .98         | -0.1         |
| <b>Ireland</b>                        | <b>280.3</b>                                                             | <b>257.8</b>                      | <b>0.38</b> | <b>-8.0</b>  |
| Sweden                                | 265.0                                                                    | 255.5                             | 0.61        | -3.6         |
| <b>New Zealand</b>                    | <b>275.3</b>                                                             | <b>243.6</b>                      | <b>0.74</b> | <b>-11.5</b> |
| Greece                                | 250.5                                                                    | 253.7                             | 0.33        | 1.3          |
| Slovenia                              | 250.8                                                                    | 256.1                             | 0.55        | 2.1          |
| <b>Belgium</b>                        | <b>271.5</b>                                                             | <b>243.0</b>                      | <b>0.14</b> | <b>-10.5</b> |
| Czech Republic                        | 241.7                                                                    | 248.3                             | 0.15        | 2.7          |
| Finland                               | 253.0                                                                    | 243.2                             | 0.47        | -3.9         |
| Netherlands                           | 248.8                                                                    | 237.9                             | 0.22        | -4.4         |
| Lebanon                               | 201.9                                                                    | 232.4                             | 0.17        | 15.1         |
| <b>Poland</b>                         | <b>241.2</b>                                                             | <b>202.5</b>                      | <b>0.32</b> | <b>-16.0</b> |
| <b>Austria</b>                        | <b>223.5</b>                                                             | <b>190.8</b>                      | <b>0.18</b> | <b>-14.7</b> |
| <b>Portugal</b>                       | <b>205.4</b>                                                             | <b>184.8</b>                      | <b>0.43</b> | <b>-10.0</b> |
| Spain                                 | 188.6                                                                    | 180.1                             | 0.51        | -4.5         |
| <b>Luxembourg</b>                     | <b>198.1</b>                                                             | <b>176.2</b>                      | <b>0.21</b> | <b>-11.0</b> |
| <b>Latvia</b>                         | <b>193.1</b>                                                             | <b>174.8</b>                      | <b>0.40</b> | <b>-9.5</b>  |
| <b>Hungary</b>                        | <b>192.9</b>                                                             | <b>175.0</b>                      | <b>0.30</b> | <b>-9.3</b>  |
| <b>Switzerland</b>                    | <b>202.8</b>                                                             | <b>170.1</b>                      | <b>0.15</b> | <b>-16.1</b> |
| <b>Germany</b>                        | <b>180.6</b>                                                             | <b>160.6</b>                      | <b>0.27</b> | <b>-11.1</b> |
| <b>Slovak Republic</b>                | <b>175.5</b>                                                             | <b>155.2</b>                      | <b>0.09</b> | <b>-11.6</b> |
| Croatia                               | 156.5                                                                    | 158.3                             | 0.67        | 1.2          |
| <b>Estonia</b>                        | <b>174.5</b>                                                             | <b>148.9</b>                      | <b>0.39</b> | <b>-14.7</b> |
| France                                | 145.8                                                                    | 141.8                             | 0.17        | -2.7         |
| <b>Italy</b>                          | <b>144.7</b>                                                             | <b>135.1</b>                      | <b>0.52</b> | <b>-6.6</b>  |
| <b>Romania</b>                        | <b>141.6</b>                                                             | <b>125.4</b>                      | <b>0.34</b> | <b>-11.4</b> |
| Argentina                             | 108.7                                                                    | 130.2                             | 0.03        | 19.8         |
| Uruguay                               | 116.1                                                                    | 118.1                             | 0.35        | 1.8          |
| Algeria                               | 108.9                                                                    | 111.6                             | 0.88        | 2.5          |
| <b>Lithuania</b>                      | <b>113.8</b>                                                             | <b>106.0</b>                      | <b>0.52</b> | <b>-6.8</b>  |
| Brazil                                | 107.0                                                                    | 112.0                             | 0.25        | 4.7          |
| <b>Thailand</b>                       | <b>102.6</b>                                                             | <b>92.9</b>                       | <b>0.34</b> | <b>-9.4</b>  |
| Singapore                             | 96.6                                                                     | 93.4                              | 0.59        | -3.3         |
| Bulgaria                              | 94.0                                                                     | 90.8                              | 0.50        | -3.4         |
| South Korea                           | 90.5                                                                     | 91.4                              | 0.72        | 1.0          |
| Taiwan                                | 87.0                                                                     | 86.8                              | 0.96        | -0.2         |
| South Africa                          | 83.9                                                                     | 87.8                              | 0.64        | 4.6          |
| <b>United Arab Emirates</b>           | <b>92.7</b>                                                              | <b>77.8</b>                       | <b>0.60</b> | <b>-16.1</b> |
| <b>Serbia</b>                         | <b>85.1</b>                                                              | <b>78.7</b>                       | <b>0.25</b> | <b>-7.5</b>  |
| Saudi Arabia                          | 72.1                                                                     | 81.1                              | 0.26        | 12.4         |
| Turkey                                | 65.0                                                                     | 73.1                              | 0.04        | 12.4         |
| <b>Bosnia</b>                         | <b>70.5</b>                                                              | <b>61.2</b>                       | <b>0.37</b> | <b>-13.2</b> |
| Russia                                | 58.6                                                                     | 66.2                              | 0.08        | 13.0         |
| <b>Tunisia</b>                        | <b>76.5</b>                                                              | <b>52.7</b>                       | <b>0.05</b> | <b>-31.1</b> |
| <b>Malaysia</b>                       | <b>65.9</b>                                                              | <b>53.7</b>                       | <b>0.21</b> | <b>-18.6</b> |
| <b>Belarus</b>                        | <b>55.0</b>                                                              | <b>51.0</b>                       | <b>0.25</b> | <b>-7.2</b>  |
| Japan                                 | 53.2                                                                     | 54.1                              | 0.82        | 1.7          |
| Egypt                                 | 51.4                                                                     | 53.3                              | 0.50        | 3.7          |
| Chile                                 | 45.5                                                                     | 50.6                              | 0.25        | 11.4         |
| Sri Lanka                             | 44.5                                                                     | 50.0                              | 0.14        | 12.4         |
| Dominican Republic                    | 44.7                                                                     | 44.7                              | 0.00        | 0.0          |
| Kuwait                                | 26.3                                                                     | 27.7                              | 0.84        | 5.4          |
| <b>Ukraine</b>                        | <b>32.1</b>                                                              | <b>26.1</b>                       | <b>0.22</b> | <b>-18.7</b> |
| <b>Jordan</b>                         | <b>28.7</b>                                                              | <b>24.1</b>                       | <b>0.50</b> | <b>-16.1</b> |
| Kazakhstan                            | 22.8                                                                     | 22.9                              | 0.97        | 0.8          |
| Bangladesh                            | 20.9                                                                     | 24.9                              | 0.17        | 19.3         |

**eTable B (continued).** Statin Utilization in Pre- and Post-COVID-19, October 2019 to September 2020

| <i>Countries/Regions</i> <sup>b</sup> | Statin utilization, No.<br>(DDD per 1000 population $\geq$ 40 y) <sup>a</sup> |                                   |             | Growth,<br>% |
|---------------------------------------|-------------------------------------------------------------------------------|-----------------------------------|-------------|--------------|
|                                       | Pre-COVID-19<br>(10/19 to 03/20)                                              | Post-COVID-19<br>(04/20 to 09/20) | <i>p</i>    |              |
|                                       | <b>Mexico</b>                                                                 | <b>28.4</b>                       | <b>23.8</b> |              |
| <b>Philippines</b>                    | <b>23.2</b>                                                                   | <b>21.3</b>                       | <b>0.54</b> | <b>-8.1</b>  |
| Ecuador                               | 18.1                                                                          | 22.3                              | 0.30        | 23.6         |
| Pakistan                              | 20.4                                                                          | 19.4                              | 0.40        | -4.8         |
| China                                 | 16.2                                                                          | 18.3                              | 0.17        | 13.3         |
| <b>Vietnam</b>                        | <b>23.3</b>                                                                   | <b>17.2</b>                       | <b>0.38</b> | <b>-26.3</b> |
| Central America <sup>c, d</sup>       | 16.1                                                                          | 16.7                              | 0.75        | 4.0          |
| Colombia                              | 14.3                                                                          | 17.3                              | 0.08        | 20.7         |
| <b>Morocco</b>                        | <b>15.5</b>                                                                   | <b>15.1</b>                       | <b>0.75</b> | <b>-3.1</b>  |
| India                                 | 13.7                                                                          | 14.3                              | <0.01       | 4.3          |
| <b>Venezuela</b>                      | <b>14.5</b>                                                                   | <b>14.4</b>                       | <b>0.95</b> | <b>-0.9</b>  |
| Peru                                  | 5.9                                                                           | 10.3                              | 0.41        | 74.7         |
| <b>Indonesia</b>                      | <b>10.9</b>                                                                   | <b>8.9</b>                        | <b>0.32</b> | <b>-18.3</b> |
| <b>West Africa</b> <sup>c, e</sup>    | <b>4.0</b>                                                                    | <b>2.8</b>                        | <b>0.04</b> | <b>-30.1</b> |

**Notes:** DDD=defined daily doses; No.=number.

**a** Statistical significance was determined using simple linear regression. Countries in bold declined  $\geq$ 5%. **b** Sorted based on statin utilization in 2020, refer to **Error! Reference source not found.** **c** IQVIA does not provide country specific utilization for this region. **d** Central American countries included Costa Rica, El Salvador, Honduras, Guatemala, Nicaragua, and Panama. **e** West African countries included Benin, Burkina Faso, Cameroon, Chad, Democratic Republic of the Congo, Gabon, Guinea, Ivory Coast, Mali, Niger, Senegal, and Togo.

# BMJ Open

## GLOBAL, REGIONAL, AND NATIONAL TRENDS IN STATIN UTILIZATION IN HIGH INCOME AND LOW- AND MIDDLE-INCOME COUNTRIES, 2015-2020

|                                 |                                                                                                                                                                                                                                                                                                                                                       |
|---------------------------------|-------------------------------------------------------------------------------------------------------------------------------------------------------------------------------------------------------------------------------------------------------------------------------------------------------------------------------------------------------|
| Journal:                        | <i>BMJ Open</i>                                                                                                                                                                                                                                                                                                                                       |
| Manuscript ID                   | bmjopen-2022-061350.R1                                                                                                                                                                                                                                                                                                                                |
| Article Type:                   | Original research                                                                                                                                                                                                                                                                                                                                     |
| Date Submitted by the Author:   | 07-Jun-2022                                                                                                                                                                                                                                                                                                                                           |
| Complete List of Authors:       | Guadamuz, Jenny; University of Southern California, School of Pharmacy<br>Shooshtari, Andrew; University of Southern California School of Pharmacy, Titus Family Department of Clinical Pharmacy<br>Qato, Dima; University of Southern California School of Pharmacy, Titus Family Department of Clinical Pharmacy; University of Southern California |
| <b>Primary Subject Heading</b>: | Cardiovascular medicine                                                                                                                                                                                                                                                                                                                               |
| Secondary Subject Heading:      | Cardiovascular medicine, Pharmacology and therapeutics, Public health, Health services research                                                                                                                                                                                                                                                       |
| Keywords:                       | PUBLIC HEALTH, Health policy < HEALTH SERVICES ADMINISTRATION & MANAGEMENT, Ischaemic heart disease < CARDIOLOGY                                                                                                                                                                                                                                      |
|                                 |                                                                                                                                                                                                                                                                                                                                                       |

SCHOLARONE™  
Manuscripts





I, the Submitting Author has the right to grant and does grant on behalf of all authors of the Work (as defined in the below author licence), an exclusive licence and/or a non-exclusive licence for contributions from authors who are: i) UK Crown employees; ii) where BMJ has agreed a CC-BY licence shall apply, and/or iii) in accordance with the terms applicable for US Federal Government officers or employees acting as part of their official duties; on a worldwide, perpetual, irrevocable, royalty-free basis to BMJ Publishing Group Ltd ("BMJ") its licensees and where the relevant Journal is co-owned by BMJ to the co-owners of the Journal, to publish the Work in this journal and any other BMJ products and to exploit all rights, as set out in our [licence](#).

The Submitting Author accepts and understands that any supply made under these terms is made by BMJ to the Submitting Author unless you are acting as an employee on behalf of your employer or a postgraduate student of an affiliated institution which is paying any applicable article publishing charge ("APC") for Open Access articles. Where the Submitting Author wishes to make the Work available on an Open Access basis (and intends to pay the relevant APC), the terms of reuse of such Open Access shall be governed by a Creative Commons licence – details of these licences and which [Creative Commons](#) licence will apply to this Work are set out in our licence referred to above.

Other than as permitted in any relevant BMJ Author's Self Archiving Policies, I confirm this Work has not been accepted for publication elsewhere, is not being considered for publication elsewhere and does not duplicate material already published. I confirm all authors consent to publication of this Work and authorise the granting of this licence.

1  
2  
3  
4  
5  
6  
7  
8  
9  
10  
11  
12  
13  
14  
15  
16  
17  
18  
19  
20  
21  
22  
23  
24  
25  
26  
27  
28  
29  
30  
31  
32  
33  
34  
35  
36  
37  
38  
39  
40  
41  
42  
43  
44  
45  
46

**GLOBAL, REGIONAL, AND NATIONAL TRENDS IN STATIN UTILIZATION IN  
HIGH INCOME AND LOW- AND MIDDLE-INCOME COUNTRIES, 2015-2020**

Jenny S. Guadamuz, PhD<sup>1-2</sup>  
Andrew Shooshtari<sup>1</sup>  
Dima M Qato, PharmD, MPH, PhD<sup>1-2</sup>

1. Program on Medicines and Public Health, Titus Family Department of Clinical Pharmacy, University of Southern California School of Pharmacy, Los Angeles, California, USA  
2. Leonard D. Schaeffer Center for Health Policy and Economics, University of Southern California, Los Angeles, California, USA

35  
36  
37  
38  
39  
40  
41  
42  
43  
44  
45  
46

**Correspondence**

Dima M Qato, PharmD, MPH, PhD  
USC School of Pharmacy  
1985 Zonal Avenue  
Los Angeles, CA 90089  
Phone: (323) 442-1392  
Email: [qato@usc.edu](mailto:qato@usc.edu)

**Length** Text 2789; abstract 252; references 27, figures 3; tables 1; supplemental materials 2.

1  
2  
3 47 **Abstract**

4 48

5 49 **Background**

6 50 Prior studies have reported inequitable global access to essential medicines for cardiovascular  
7 51 disease (CVD) prevention, especially statins. We examine recent trends and disparities in statin  
8 52 utilization at the income group, regional, and country levels.

9 53

10 54 **Methods**

11 55 Pharmaceutical sales data was used to examine statin utilization in 41 high-income countries  
12 56 (HICs) and 50 low- and middle-income countries (LMICs) from 2015 to 2020. Utilization was  
13 57 measured using defined daily doses (DDD) per 1000 population  $\geq 40$  years per day (TPD). Fixed-  
14 58 effects panel regression analysis was used to examine associations between statin utilization and  
15 59 country-level factors.

16 60

17 61 **Findings**

18 62 Globally, statin utilization increased 24.7% from 54.7 DDD/TPD in 2015 to 68.3 DDD/TPD in  
19 63 2020. However, regional and income group disparities persisted during this period. In 2020,  
20 64 statin utilization was more than six-times higher in HICs than LMIC (192.4 vs. 28.4 DDD/TDP,  
21 65  $p < 0.01$ ). Substantial disparities were also observed between LMICs, ranging from 3.1  
22 66 DDDs/TDPs in West African nations to 225.0 DDD/TDP in Lebanon in 2020. While statin  
23 67 utilization increased in most LMIC between 2015 to 2020, several experienced declines in  
24 68 utilization, most notably Venezuela (-85.1%, from 92.3 to 14.0 DDD/TPD). In LMICs, every  
25 69 \$100 increase in per capita health spending was associated with a 17% increase in statin  
26 70 utilization, while every 10% increase in out-of-pocket health spending was associated with a  
27 71 11% decline (both  $p < 0.05$ ).

28 72

29 73 **Interpretation**

30 74 Despite global increases in statin utilization, there are substantial regional and country-level  
31 75 disparities between HIC and LMICs. To address global CVD disparities, policymakers should  
32 76 promote increased and equitable access to statins in LMICs.

33 77

## Strengths and Limitations

- Pharmaceutical sales data was used to examine statin utilization in 41 high-income countries (HICs) and 50 low- and middle-income countries (LMICs) — representing approximately 90% of the global population older than 40 years of age.
- Comparisons between regions, income groups, and countries should be interpreted in the context of the available data and total market coverage of the included countries.
- IQVIA does not provide sales data for most low-income countries; therefore, this study may underestimate the magnitude of statin utilization disparities between HICs and LMICs.
- Relationships between changes in statin utilization and country-level characteristics are not casual.

## 90 INTRODUCTION

91  
92 Cardiovascular disease (CVD)—primarily ischemic heart disease (IHD)—causes approximately  
93 one-third of deaths worldwide.[1] While age-standardized CVD mortality rates have declined  
94 globally, the number of deaths due to CVD has increased from 12.1 million in 1990 to 18.6  
95 million in 2019[1] and substantial regional, income group, and country level disparities  
96 exist.[2,3] For example, age-standardized CVD mortality rates were lowest in high-income  
97 countries (HICs) in Asia-Pacific, Europe, and North America and highest in low- and middle-  
98 income countries (LMICs) in Eastern Europe, Middle East and North Africa, and South Asia.[4]  
99 Moreover, the CVD burden has increased in nearly every LMIC during the past three decades.[1]  
100 Currently, LMICs account for approximately 80% of global CVD deaths.[2]

101  
102 Medicines, alongside lifestyle changes such as diet, exercise, and smoking cessation, are a  
103 cornerstone of CVD prevention.[5] Statins (HMG-CoA reductase inhibitors) are particularly  
104 important because they are widely recommended for primary and secondary prevention—that is,  
105 among adults with and without known CVD.[5–7] Statins have been included in the World  
106 Health Organization (WHO) Model Essential Medicines List (EML)—used to develop national  
107 EMLs that guide public procurement—since 2007.[8] Despite statins steadily losing patent  
108 protections throughout the world since 2006,[8] only 60% of LMICs include these medicines in  
109 their EMLs as of 2017.[9] As medicines included in EMLs have higher availability in the private  
110 and public sectors,[10] these policies—as well as differences in income, health spending, and  
111 disease burden—may result in global disparities in statin utilization.

112  
113 While utilization of preventative cardiovascular medicines, including statins, has increased  
114 globally in the past decade, large disparities exist.[11,12] For example, a study using  
115 pharmaceutical sales data from 65 countries found that consumption of cardiovascular medicines  
116 was approximately six-times higher in HICs than in LMICs in 2018.[11] A separate study using  
117 sales data from 83 countries found that consumption of lipid-lowering medicines was at least  
118 three-times higher in HICs than in LMICs in 2018.[12] However, these studies do not focus on  
119 the population at greatest need, adults older than 40 years,[6,7] nor do they evaluate country-  
120 level factors associated with statin utilization. Furthermore, an updated analysis of statin  
121 utilization is imperative considering the ongoing COVID-19 pandemic that has caused severe  
122 disruptions to the pharmaceutical supply chain and the provision of healthcare.[13–15]

123  
124 This study used global pharmaceutical sales data to estimate statin utilization per population  
125 aged 40 years and older in 91 countries from 2015 to 2020. Disparities across and within regions  
126 and income groups were examined over time, including in the six months prior to and following  
127 the start of the COVID-19 pandemic. To inform global efforts to improve access to essential  
128 medicines, we also examined the extent to which country-level factors, such as gross domestic  
129 product (GDP), health spending, and underlying IHD burden, are associated with statin  
130 utilization.

## 131 **Methods**

### 132 *Design and Data Sources*

133 We conducted a cross-sectional study examining trends and disparities in statin utilization in 91  
134 countries using pharmaceutical sales data collected by IQVIA (Multinational Integrated Data  
135

1  
2  
3 136 Analysis System, MIDAS) from January 2015 to October 2020. These countries represent  
4 137 approximately 90% of the global population older than 40 years of age.[16] IQVIA samples  
5 138 pharmaceutical sales from multiple distribution channels (e.g., manufacturers, wholesalers, and  
6 139 medical facilities) to develop nationally representative estimates of retail and non-retail  
7 140 pharmaceutical sales in each country.[17] If necessary, IQVIA projects its samples to represent  
8 141 100% of the retail and non-retail sales in each country and reports >90% global precision in  
9 142 recent years.[17] However, IQVIA does not publicly disclose detailed information on data  
10 143 collection, projection, and validation.  
11  
12 144

13 145 Several sources were used to further characterize these countries. Countries were grouped based  
14 146 on their income and geographical regions per the World Bank (2020).[18] Population estimates  
15 147 and age-standardized IHD mortality rates (GBD 2019 causes of death were mapped to  
16 148 International Classification of Diseases[19]were obtained from the Global Burden of Disease  
17 149 (GBD) (2015-2019).[16] Health expenditures (total, public, out-of-pocket) were also obtained  
18 150 from the World Bank (2015-2018).[20] We projected the values of these estimates through 2020  
19 151 by applying the county-specific growth rates observed from 2015 to 2018 or 2019 (depending on  
20 152 data availability). Finally, whether statins were included in national essential medicine lists was  
21 153 determined, for reference, using the Global Essential Medicines database (2017).[9]  
22  
23 154

#### 24 155 *Measuring Statin Utilization*

25 156 We extracted country-level dispensing for WHO Anatomic Therapeutic Chemical codes relating  
26 157 to statins (C10AA).[21] As IQVIA does not report country-specific data for six countries in  
27 158 Centra America (Costa Rica, El Salvador, Guatemala, Honduras, Nicaragua, and Panama) and  
28 159 twelve countries in West Africa (Benin, Burkina Faso, Cameroon, Chad, Côte d'Ivoire,  
29 160 Democratic Republic of Congo, Gabon, Guinea, Mali, Niger, Senegal, and Togo), we examined  
30 161 these countries in aggregate. We examined total market data, or retail and non-retail statin sales,  
31 162 for 52 countries (eTable A). In the 23 countries/groups that lack non-retail sector data, utilization  
32 163 was estimated by interpolation, using the ratio of statin consumption in the retail and non-retail  
33 164 sectors for other countries in their region for which data was available (85% of all statins were  
34 165 dispensed through the retail sector).  
35  
36 166

37 167 To enable international comparisons over time, we converted statin sales (expressed in  
38 168 milligrams) into defined daily doses (DDD) using the Anatomical Therapeutic Chemical  
39 169 Classification System developed by the WHO Collaborating Centre for Drug Statistics  
40 170 Methodology.[21] To account for differences in population size and age distribution, we report  
41 171 statin utilization as DDDs per 1000 population  $\geq 40$  years per day (TPD) for each country.  
42 172 Global, regional, and income group statin utilizations in DDD/TPD were derived by aggregating  
43 173 statin sale and population estimates.  
44  
45 174

#### 46 175 *Statistical Analysis*

47 176 Descriptive statistics were used to examine trends and disparities in statin utilization from 2015  
48 177 to 2020. Simple linear regressions were used to determine statistical significance in trends and  
49 178 disparities. Changes in statin utilization in the pre- (October 2019 to March 2020) and post-  
50 179 COVID-19 (April 2020 to October 2020) periods were also evaluated.  
51  
52 180

1  
2  
3 181 Fixed-effects panel regression analysis was used to quantify the association between economic  
4 182 and health indicators and the statin utilization from 2015 to 2020. Annual, country-level statin  
5 183 utilization estimates were logged in these models to enable interpretation as percent change  
6 184 associated with each unit of the independent variables examined. The independent variables  
7 185 included time-varying health expenditure per capita, out-of-pocket health expenditure (as a  
8 186 percentage of total expenditure), and age-standardized IHD mortality rate. Errors were clustered  
9 187 by year and country to account for serial correlation.  
10 188

11 189 All *p*-values are two-sided. STATA version 17.1 was used for all statistical analyses.  
12 190

13 191 This study was considered exempt by the Institutional Review Board at the University of  
14 192 Southern California because this study was not considered human subjects research.  
15 193

16 194 No patients or members of the public were involved in the design of this study  
17 195

## 18 196 RESULTS

19 197 As shown in **Figure 1**, global statin utilization increased 24.7% from 54.7 DDD/TPD in 2015 to  
20 198 68.3 DDD/TPD ( $p<0.01$ ). While statin utilization increased, to varying degrees, in all regions  
21 199 and income groups (all  $p<0.05$ ), disparities persisted. In 2020, statin utilization was highest in  
22 200 North America and Europe (279.7 and 159.9 DDD/TPD, respectively) and substantially lower in  
23 201 Latin America, MENA, East Asia, South Asia, and sub-Saharan Africa (66.1, 64.1, 29.3, 16.1,  
24 202 and 24.7 DDD/TPD, respectively). From 2015 to 2020, statin utilization increased substantially  
25 203 in HICs (19.3% from 161.3 to 192.4 DDD/TPD) and LMICs (57.9% from 18.0 to 28.4  
26 204 DDD/TPD). However, disparities by income group remained throughout this period—by 2020,  
27 205 statin utilization was seven times greater in HICs than in LMICs.  
28 206

29 207 **Figure 2** depicts country-specific variation in statin utilization. From 2015 to 2020, statin  
30 208 utilization increased or remained stable in most HICs, except Singapore (125.2 to 95.0, -24.1%,  
31 209  $p=0.27$ ), the United Arab Emirates (104.4 to 83.9, -19.7%,  $p=0.02$ ), Luxembourg (216.6 to  
32 210 185.3, -14.4%,  $p<0.01$ ), and New Zealand (295.4 to 256.0, -13.4%,  $p=0.12$ ). HICs located in  
33 211 North America and Europe have substantially higher statin utilization than comparable countries  
34 212 located in other regions. For example, in 2020, statin utilization in HICs ranged from over 300  
35 213 DDD/TPD in Denmark, Canada, and United Kingdom to less than 50 DDD/TPD in Japan, Chile,  
36 214 and Kuwait.  
37 215

38 216 From 2015 to 2020, statin utilization increased by more than 10% in nearly all LMICs.  
39 217 Exceptions included India (12.9 to 14.1, 9.1%,  $p=0.02$ ), Malaysia (57.8 to 60.0, 3.9%,  $p=0.41$ ),  
40 218 Ecuador (20.2 to 20.9, 3.6%,  $p=0.09$ ), and Jordan (28.6 to 27.1, -5.4%,  $p=0.20$ ), where  
41 219 utilization remained relatively stable, and Venezuela, where utilization sharply declined (92.3 to  
42 220 13.8, -85.1%,  $p<0.01$ ). Several LMICs had higher statin utilization than the global average in  
43 221 2020, including Lebanon, Algeria, Brazil, Thailand, and South Africa (224.9, 111.8, 109.3,  
44 222 96.8, and 85.4 DDD/TPD, respectively). Statin utilization is lower than 34 DDD/TPD  
45 223 (approximately half the global average) in 35 LMICs, including some of the most populous  
46 224 nations, such as China, India, Indonesia, Pakistan, Bangladesh, and Mexico.  
47 225

226 **Table 1** presents factors associated with changes in statin utilization. In HICs, only health  
227 expenditure per capita was significantly and positively associated with statin utilization. In  
228 LMICs, every \$100 increase in health expenditure per capita was associated with a 17% increase  
229 in utilization, while every 10% increase in out-of-pocket health expenditure (as percentage of  
230 total health expenditure) was associated with a 11% decline in utilization (both  $p < 0.05$ ). Greater  
231 rates of IHD mortality were also positively associated with more statin utilization in LMICs.

232  
233 Compared with the pre-COVID-19 period, statin utilization declined by more than 5.0% in 41  
234 countries, including 19 HICs and 22 LMICs (**Figure 3**). Severe disruptions in statin utilization—  
235 or  $\geq 10\%$  decline—were found in 13 HICs, including Australia (327.5 to 265.2 DDD/TPD, -  
236 19.0%), the United Arab Emirates (92.7 to 77.8 DDD/TPD, -16.1%), and Germany (180.6 to  
237 160.6 DDD/TPD, -11.1%) (**eTable B**). Some of the most severe disruptions in statin utilization  
238 were observed among LMICs, including in Tunisia (76.5 to 52.7 DDD/TPD, -31.1%), Vietnam  
239 (23.3 to 17.2 DDD/TPD, -26.3%), Ukraine (32.1 to 26.1 DDD/TPD, -18.7%), and Mexico  
240 (28.4 to 23.8 DDD/TPD, -16.3%).

## 241 242 **DISCUSSION**

243 Using a global database, representing approximately 90% of the global population older than 40  
244 years of age,[16] we found persistent disparities across regions, income groups, and countries in  
245 statin utilization which may contribute to worsening disparities in CVD mortality. While global  
246 statin utilization has increased 25% from 2015 to 2020, statin utilization remains higher in the  
247 “global north” (e.g., North America, Europe, and Oceania) and in HICs than countries in other  
248 regions and LMICs.[4] In 2020, statin utilization was seventeen times higher in North America  
249 versus South Asia—the region with the highest age-adjusted CVD mortality rate in the  
250 world[4]—and seven times higher in HICs versus LMICs—that are experiencing a near universal  
251 increase in the number of CVD deaths.[1]

252  
253 Statin utilization is also substantially lower in countries with disproportionately high age-  
254 standardized CVD mortality rates, namely LMICs in South Asia, MENA, and sub-Saharan  
255 Africa.[4] The WHO Global Non-Communicable Disease (NCD) Action Plan 2013-2020 aimed  
256 for a 25% reduction in premature deaths from NCD, especially CVD, from 2010 to 2025 by  
257 ensuring that at least half of adults at high CVD risk receive cardiovascular medicines and that  
258 80% of public and private facilities have these essential medicines available on-site.[22] Growth  
259 in statin utilization in LMICs was concentrated among those countries with worsening IHD  
260 mortality—suggesting reactionary policies for the management of CVD morbidity and mortality  
261 versus preventative strategies for the provision of essential medicines. Together, our findings  
262 suggest that global efforts to reduce the burden of CVD need to be strengthened—statin  
263 utilization remains inequitable and suboptimal in LMICs, including those with worsening rates  
264 of CVD mortality.

265  
266 Importantly, there is a substantial gap between CVD burden and statin utilization between HIC  
267 and LMICs. For example, statin utilization is very low (less than half the global average) in 70%  
268 of the LMICs examined, yet account for 68% of the global population of middle aged and older  
269 adults and 55% CVD deaths worldwide.[16] Forty-two percent of CVD deaths occur in China  
270 (25%), India (14%), and Indonesia (4%),[16] all of whom have very low statin utilization and  
271 together account for less than 11% of statins dispensed in the world. From 2015 to 2019, the IHD



1  
2  
3 272 mortality rate has declined or remained stable in most LMICs, with notable exceptions of  
4 273 Bangladesh (5%), Malaysia (5%), and Venezuela (10%) that have experienced substantial  
5 274 increases in recent years.[16] These countries, with worsening IHD mortality, have  
6 275 comparatively low statin utilization in given their regional and income group averages. However,  
7 276 Venezuela has also experienced substantial declines in statin utilization in this period—  
8 277 aggravating the IHD burden experienced by its populace.  
9 278

10 279 Among LMICs, we found that every \$100 increase in per capita health spending was associated  
11 280 with a 17% increase in statin utilization and that every 10% increase in the proportion of out-of-  
12 281 pocket health spending was associated with an 11% decline. These findings suggest that policy  
13 282 efforts to address global disparities in statin utilization, may need to increase health spending  
14 283 while shifting the burden of health spending from individuals to the public sector (either via the  
15 284 direct provision of healthcare and medicines or via insurance schemes). Unfortunately, public  
16 285 investment in health (as measured by government health spending as a percentage of total  
17 286 expenditures) has declined in LMICs during the last two decades.[23] Only high-income and  
18 287 upper-middle countries have seen moderate increases in government health spending,[23]  
19 288 countries that consume a disproportionate share of statins. Out-of-pocket spending as a share of  
20 289 total health spending has remained stubbornly high in LMICs (above 40% and twice the  
21 290 percentage in HICs) during this period.[23] International aid—a major source of health spending  
22 291 in LMICs—is disproportionately directed to communicable diseases,[23] and these policies may  
23 292 aggravate global disparities in the use of essential medicines, including statins, and hinder efforts  
24 293 to reduce CVD mortality. International aid for health, which could alleviate costs of essential  
25 294 medicines for governments and the public, has also stagnated since 2013.[23]  
26 295

27 296 Economic or political crises, which are often followed by sharp declines in total health spending,  
28 297 may also impact access to essential medicines. The starkest example is Venezuela, where statin  
29 298 utilization declined 85% between 2015 to 2020. The ongoing sociopolitical crisis began in 2010  
30 299 and has spiraled into a sustained period of hyperinflation, a 75% decline in health spending, as  
31 300 well as widespread and chronic shortages of essential medicines in the past decade.[20,24]  
32 301

33 302 Pharmaceutical supply chain disruptions have resulted from slowdowns in the production of  
34 303 medicines that impact domestic and international markets, transportation hurdles, and restrictions  
35 304 on movement (internationally and domestically and by providers and patients).[25] For example,  
36 305 early in the pandemic, active pharmaceutical ingredient production in China was severely  
37 306 curtailed—leading to shortages and delays in the production of medicines throughout the world,  
38 307 including in the United States, the European Union, and India.[26]  
39 308

40 309 During the first six months of COVID-19 pandemic, statin utilization declined by more than 5%  
41 310 in 41 countries. As a whole, HICs experienced greater declines in statin utilization during the  
42 311 post-COVID-19 period (-2% versus -4% observed worldwide). Perhaps, because HICs had more  
43 312 severe restrictions on movement to mitigate COVID-19 spread than LMICs early in the  
44 313 pandemic.[27] However, the most severe disruptions in individual countries occurred in LMICs,  
45 314 which may be more vulnerable to supply chain disruptions. Several countries in Eastern Europe  
46 315 (*e.g.*, Serbia, Bosnia, Belarus, and Ukraine), Southeast Asia (*e.g.*, Thailand, Malaysia, the  
47 316 Philippines, Vietnam, and Indonesia), and MENA (*e.g.*, Tunisia and Jordan) saw dramatic  
48 317 declines in statin utilization, as did West Africa as a region and Mexico. Global COVID-19  
49  
50  
51  
52  
53  
54  
55  
56  
57  
58  
59  
60

1  
2  
3 318 disparities, including inequitable access to vaccinations,[27] may result in persistent disruptions  
4 319 to statins access in LMICs, as countries prioritize acute health needs. If these trends continue, the  
5 320 COVID-19 pandemic may halt or reverse gains in statin utilization and worsen regional and  
6 321 country level CVD disparities between HIC and LMICs.  
7 322

### 9 323 *Limitations*

10 324 This study had several limitations. First, comparisons between regions, income groups, and  
11 325 countries should be interpreted in the context of the available data and total market coverage of  
12 326 the included countries. For example, IQVIA does not provide non-retail sales for 39 of the 91  
13 327 countries examined. However, 85% of all statins were dispensed through retail pharmacies, and  
14 328 we account for missing non-retail sales through interpolation (using the ratio of statin  
15 329 consumption in the retail and non-retail sectors for other countries in their region for which data  
16 330 was available). Second, IQVIA does not provide sales data for most low-income countries;  
17 331 therefore, this study may underestimate the magnitude of statin utilization disparities between  
18 332 HICs and LMICs. Finally, relationships between changes in statin utilization and country-level  
19 333 characteristics are not casual. However, the trends and disparities in statin utilization described in  
20 334 this study help evaluate the global progress in ensuring equitable access to essential medicines  
21 335 and inform efforts to reduce the global burden of CVD.  
22 336

### 25 337 **Conclusion**

26 338 Despite a 25% increase in global statin utilization from 2015 to 2020, there are substantial and  
27 339 persistent regional and country-level disparities between HIC and LMICs. To address worsening  
28 340 CVD disparities, global, regional, and national policymakers should promote increased and  
29 341 equitable access to statins in LMICs.  
30  
31  
32  
33  
34  
35  
36  
37  
38  
39  
40  
41  
42  
43  
44  
45  
46  
47  
48  
49  
50  
51  
52  
53  
54  
55  
56  
57  
58  
59  
60

**Contributorship statements**

- Guadamuz JS: Conceptualisation, data curation, formal analysis, methodology, validation, visualisation, software, writing – original draft, and writing – review & editing.
- Shooshtari A: Project administration and writing – original draft.
- Qato DM: Conceptualisation, funding acquisition, writing – original draft, and writing – review & editing

**Competing interests**

Dr. Guadamuz current reports employment with Flatiron Health, Inc, which is an independent subsidiary of the Roche Group. Flatiron Health, Inc., had no role in the design and conduct of the study, analysis or interpretation of the data, and preparation, or final approval of the article before publication.

**Funding**

Dr. Guadamuz was supported by the Robert Wood Johnson Foundation Health Policy Research Scholars program. Dr. Qato was supported by the Robert Wood Johnson Foundation Clinical Scholars program. Data obtained under license from IQVIA as part of IQVIA Institute's Human Data Science Research Collaborative in the Era of COVID-19. The funders, the Robert Wood Johnson Foundation, and IQVIA, had no role in the design and conduct of the study, analysis or interpretation of the data, and preparation, or final approval of the article before publication.

**Data sharing statement**

Data for this study will not be made available due to licensing agreements with IQVIA.

## 368 REFERENCES

- 369 1. Roth GA, Mensah GA, Johnson CO, Addolorato G, Ammirati E, Baddour LM, et al.  
370 Global Burden of Cardiovascular Diseases and Risk Factors, 1990–2019. *Journal of the*  
371 *American College of Cardiology*. 2020 Dec 10;76(25):2982–3021.
- 372 2. Bowry ADK, Lewey J, Dugani SB, Choudhry NK. The Burden of Cardiovascular Disease  
373 in Low- and Middle-Income Countries : *Epidemiology and Management*. *Canadian*  
374 *Journal of Cardiology*. 2020;31(9):1151–9.
- 375 3. Barquera S, Pedroza-Tobías A, Medina C, Hernández-Barrera L, Bibbins-Domingo K,  
376 Lozano R, et al. Global Overview of the Epidemiology of Atherosclerotic Cardiovascular  
377 Disease. *Archives of Medical Research*. 2015;46(5):328–38.
- 378 4. Roth GA, Johnson C, Abajobir A, Abd-Allah F, Abera SF, Abyu G, et al. Global,  
379 Regional, and National Burden of Cardiovascular Diseases for 10 Causes, 1990 to 2015.  
380 *Journal of the American College of Cardiology*. 2017;70(1):1–25.
- 381 5. World Health Organization. Prevention of Cardiovascular Disease: Guidelines for  
382 assessment and management of cardiovascular risk [Internet]. 2007 [cited 2021 Oct 24].  
383 Available from: [https://www.who.int/cardiovascular\\_diseases/guidelines](https://www.who.int/cardiovascular_diseases/guidelines)
- 384 6. Grundy SM, Stone NJ, Bailey AL et al. 2018  
385 ACC/AHA/AACVPR/AAPA/ABC/ACPM/ADA/AGS/ APhA/ASPC/NLA/PCNA  
386 Guideline on the Management of Blood Cholesterol: A Report of the American College of  
387 Cardiology Foundation/American Heart Association Task Force on Clinical Practice  
388 Guidelines. *J Am Coll Cardiol*. 2018;  
389
- 390 7. Arnett DK, Blumenthal RS, Albert MA, Buroker AB, Goldberger ZD, Hahn EJ, et al.  
391 2019 ACC/AHA Guideline on the Primary Prevention of Cardiovascular Disease: A  
392 Report of the American College of Cardiology/American Heart Association Task Force on  
393 Clinical Practice Guidelines. *Circulation*. 2019 Sep 10;140(11):e596–646.
- 394 8. Kishore SP, Blank E, Heller DJ, Patel A, Peters A, Price M, et al. Modernizing the World  
395 Health Organization List of Essential Medicines for Preventing and Controlling  
396 Cardiovascular Diseases. *Journal of the American College of Cardiology*.  
397 2018;71(5):564–74.
- 398 9. World Health Organization. Global Essential Medicine [Internet]. 2019 [cited 2021 Jul  
399 25]. Available from: <https://global.essentialmeds.org/>
- 400 10. Bazargani YT, Ewen M, de Boer A, Leufkens HGM, Mantel-Teeuwisse AK. Essential  
401 medicines are more available than other medicines around the globe. *PloS one*. 2014 Feb  
402 12;9(2):e87576–e87576.
- 403 11. Yan VKC, Blais JE, Li X, Chui CSL, Wei L, Yan BP, et al. Trends in Cardiovascular  
404 Medicine Use in 65 Middle- and High-Income Countries. *Journal of the American College*  
405 *of Cardiology*. 2021;77(7):1021–3.
- 406 12. Blais JE, Wei Y, Yap KKW, Alwafi H, Ma TT, Brauer R, et al. Trends in lipid-modifying  
407 agent use in 83 countries. *Atherosclerosis*. 2021;328:44–51.
- 408 13. Alexander GC, Qato DM. Ensuring Access to Medications in the US During the COVID-  
409 19 Pandemic. *JAMA*. 2020 Jul 7;324(1):31–2.
- 410 14. Lakavage A. Covid-19 has exposed cracks in the global medicines supply chain [Internet].  
411 STAT. 2020 [cited 2021 Oct 24]. Available from:  
412 [https://www.statnews.com/2020/06/02/covid-19-exposed-cracks-global-medicines-supply-](https://www.statnews.com/2020/06/02/covid-19-exposed-cracks-global-medicines-supply-chain/)  
413 [chain/](https://www.statnews.com/2020/06/02/covid-19-exposed-cracks-global-medicines-supply-chain/)

- 1  
2  
3 414 15. World Health Organization. COVID-19 continues to disrupt essential health services in  
4 415 90% of countries [Internet]. 2021 [cited 2021 Oct 24]. Available from:  
5 416 <https://www.who.int/news/item/23-04-2021-covid-19-continues-to-disrupt-essential->  
6 417 [health-services-in-90-of-countries](https://www.who.int/news/item/23-04-2021-covid-19-continues-to-disrupt-essential-)
- 8 418 16. Institute for Health Metrics and Evaluation. Global Burden of Disease Study 2019  
9 419 [Internet]. 2021 [cited 2021 Dec 12]. Available from: <http://www.healthdata.org/gbd>
- 10 420 17. IQVIA. Accuracy and Timeliness Statistics Annual Report, 2020 [Internet]. 2021 [cited  
11 421 2021 Jul 25]. Available from: <https://www.iqvia.com/library/publications/acts-2020>
- 12 422 18. World Bank Data. World Bank Country and Lending Groups [Internet]. 2021 [cited 2021  
13 423 Jul 25]. Available from:  
14 424 <https://datahelpdesk.worldbank.org/knowledgebase/articles/906519-world-bank-country->  
15 425 [and-lending-groups](https://datahelpdesk.worldbank.org/knowledgebase/articles/906519-world-bank-country-)
- 17 426 19. Institute for Health Metrics and Evaluation. Global Burden of Disease Study 2019 (GBD  
18 427 2019) Cause List Mapped to ICD Codes [Internet]. 2021 [cited 2022 May 27]. Available  
19 428 from: <https://ghdx.healthdata.org/record/ihme-data/gbd-2019-cause-icd-code-mappings>
- 20 429 20. World Bank. World Bank Open Data [Internet]. 2021 [cited 2021 Jul 25]. Available from:  
21 430 <https://data.worldbank.org/>
- 23 431 21. WHO Collaborating Centre for Drug Statistics Methodology. Purpose of the ATC/DDD  
24 432 system [Internet]. [cited 2020 Apr 6]. Available from:  
25 433 [https://www.whocc.no/atc\\_ddd\\_methodology/purpose\\_of\\_the\\_atc\\_ddd\\_system/](https://www.whocc.no/atc_ddd_methodology/purpose_of_the_atc_ddd_system/)
- 26 434 22. World Health Organization (WHO). Global Action Plan for the Prevention and Control of  
27 435 Noncommunicable Diseases 2013-2020. 2013.
- 28 436 23. World Health Organization (WHO). Global spending on health: Weathering the storm.  
29 437 2020.
- 31 438 24. Raphelson S. Venezuela's Health Care System Ready To Collapse Amid Economic Crisis  
32 439 [Internet]. NPR. 2018 [cited 2021 Dec 26]. Available from:  
33 440 <https://www.npr.org/2018/02/01/582469305/venezuelas-health-care-system-ready-to->  
34 441 [collapse-amid-economic-crisis](https://www.npr.org/2018/02/01/582469305/venezuelas-health-care-system-ready-to-)
- 35 442 25. McDonell A, Chalkidou K, Yadav P, Rosen D. Understanding the Impact Of COVID-19  
36 443 On Essential Medicine Supply Chains [Internet]. Center For Global Development. 2020  
37 444 [cited 2021 Dec 26]. Available from: <https://www.cgdev.org/blog/understanding-impact->  
38 445 [covid-19-essential-medicine-supply-chains](https://www.cgdev.org/blog/understanding-impact-)
- 40 446 26. Mullin R. COVID-19 is reshaping the pharmaceutical supply chain. Chem Eng News.  
41 447 2020 Apr 27;98(16):31-5.
- 42 448 27. Eyawo O, Viens AM, Ugoji UC. Lockdowns and low- and middle-income countries:  
43 449 building a feasible, effective, and ethical COVID-19 response strategy. *Globalization and*  
44 450 *Health*. 2021 Dec 1;17(1):1-5.

**Table 1.** Factors Associated with Statin Utilization, 2015 to 2020

|                                                 | Exponentiated Coefficient (CI) <sup>a</sup> |                                 |
|-------------------------------------------------|---------------------------------------------|---------------------------------|
|                                                 | High-income countries                       | Low-and middle-income countries |
| No. <sup>b</sup>                                | 40                                          | 33                              |
| Health expenditure per capita (\$) <sup>c</sup> | 1·01 (1·01, 1·02)*                          | 1·17 (1·12, 1·22)*              |
| OOP health expenditure (%) <sup>d</sup>         | 0·99 (0·91, 1·09)                           | 0·89 (0·82, 0·96)*              |
| IHD mortality rate <sup>e</sup>                 | 1·00 (0·99, 1·02)                           | 1·02 (1·01, 1·03)*              |

**Notes:** IHD=ischemic heart disease, OOP=out-of-pocket, No.=number.

**a** Statin utilization is defined as defined daily doses per 1000 population  $\geq$  40 y per day. Here logged statin utilization is examined. Data for 2020 is based on statin utilization from January to September 2020. **b** Countries in Central America and West Africa were excluded because IQVIA does not report country-specific information for these regions. **c** Increments of 100. **d** Increments of 10. **e** Age-standardized IHD mortality rate, increments of 10. \*  $p < 0\cdot05$

### Figure Legends

#### Figure 1. Statin Utilization by Geographical Region and Income, 2015 to 2020

**Notes:** DDD=defined daily doses; MENA=Middle East and North Africa; No.=number.

**a** All trends in statin utilization were statistically significant ( $p < 0\cdot05$ ), per simple linear regression. **b** We captured statin utilization for 91 countries. **c** Based on data from January to September 2020

#### Figure 2. Statin Utilization by Country, 2015 to 2020

**Notes:** DDD=defined daily doses; No.=number. Data for 2020 is based on statin utilization from January to September 2020. “Very low utilization” refers to utilization  $< \frac{1}{2}$  global statin utilization

#### Figure 3. Change in Statin Utilization in Pre- and Post-COVID-19, October 2019 to September 2020

**Notes:** DDD=defined daily doses; No.=number. Pre-COVID-19 includes the period of October 2019 to March 2020 and post-COVID-19 includes the period of April 2020 to October 2020.

**Figure 1.** Statin Utilization by Geographical Region and Income, 2015 to 2020**a. By Region****b. By Income**

**Notes:** DDD=defined daily doses; MENA=Middle East and North Africa; No.=number.

**a** All trends in statin utilization were statistically significant ( $p < 0.05$ ), per simple linear regression. **b** We captured statin utilization for 91 countries. **c** Based on data from January to September 2020.

**Figure 2. Statin Utilization by Country, 2015 to 2020**

a. Change in statin utilization, 2015 to 2020

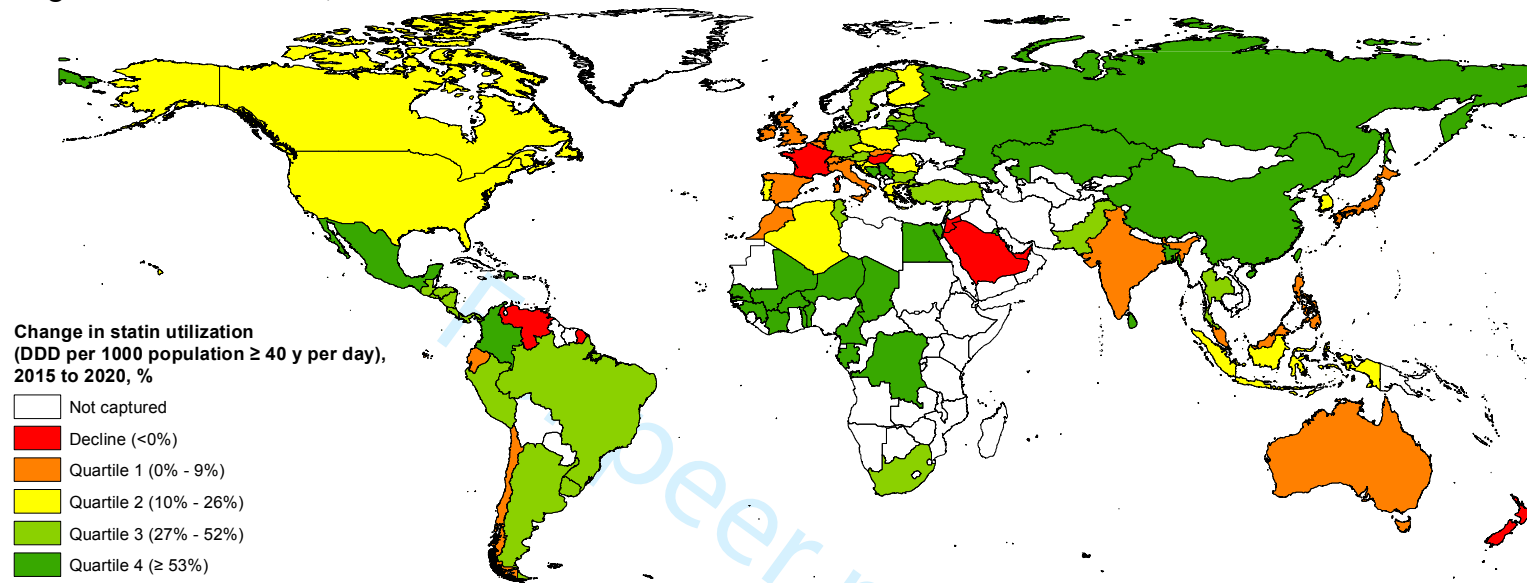

b. Statin utilization, 2020

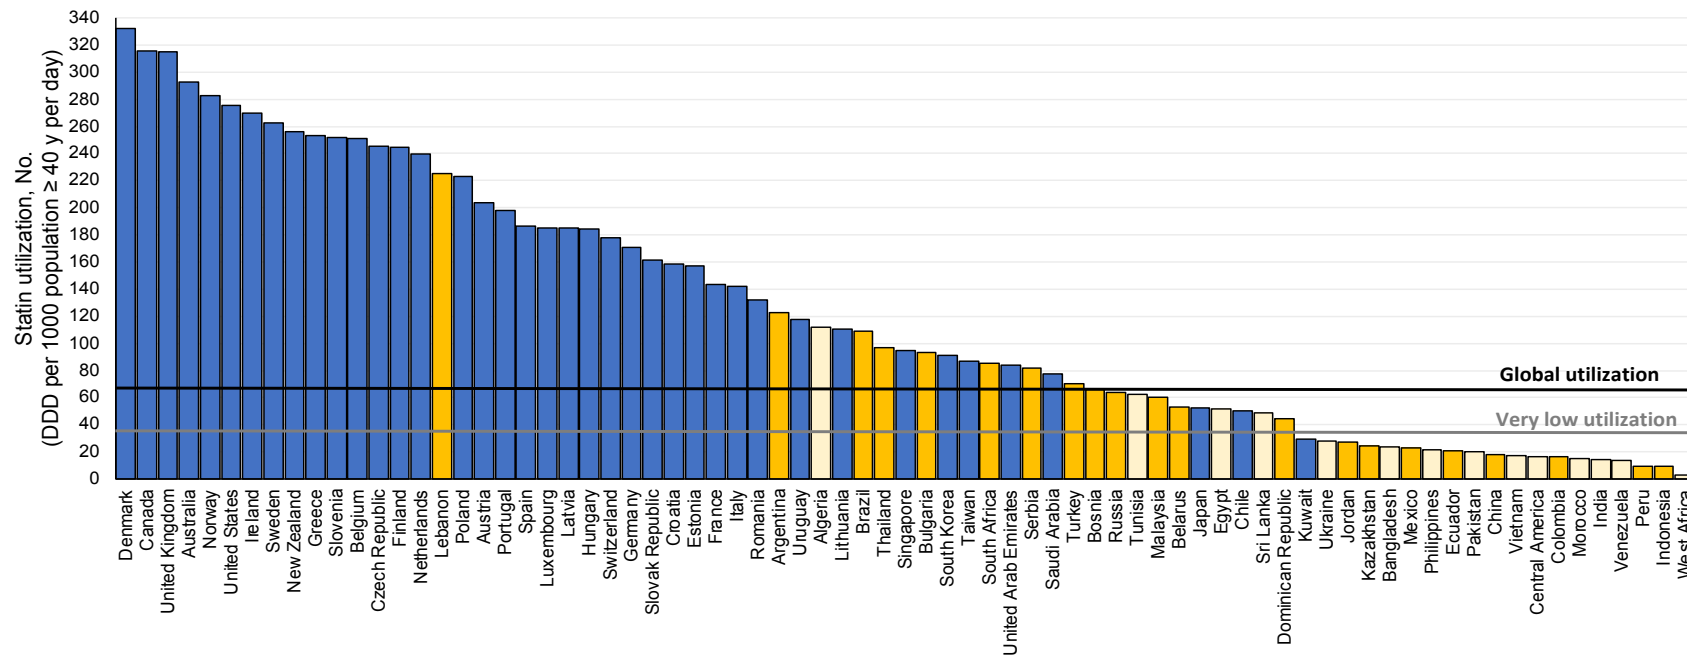

**Notes:** DDD=defined daily doses; No.=number. Data for 2020 is based on statin utilization from January to September 2020. “Very low utilization” refers to utilization < ½ global statin utilization.



**Figure 3.** Change in Statin Utilization in Pre- and Post-COVID-19, October 2019 to September 2020



**Notes:** DDD=defined daily doses; No.=number. Pre-COVID-19 includes the period of October 2019 to March 2020 and post-COVID-19 includes the period of April 2020 to October 2020.

## ONLINE SUPPLEMENT

eTable A. Economic and Health Indicators of Countries Examined

|                              | Drug utilization data source <sup>a</sup> | Region <sup>b</sup> | Income (2020) <sup>b</sup> | GDP per capita (2020) <sup>b</sup> | Health expenditure per capita (2018) <sup>b</sup> | % of health expenditure <sup>b</sup> |     | Statins included in EML (2017) <sup>c</sup> | IHD mortality rate (2019) <sup>d</sup> |
|------------------------------|-------------------------------------------|---------------------|----------------------------|------------------------------------|---------------------------------------------------|--------------------------------------|-----|---------------------------------------------|----------------------------------------|
|                              |                                           |                     |                            |                                    |                                                   | Public                               | OOP |                                             |                                        |
| Australia                    | Total market                              | East Asia & Pacific | High                       | \$51,812                           | \$5,425                                           | 69                                   | 18  | -                                           | 56.1                                   |
| Japan                        | Total market                              | East Asia & Pacific | High                       | \$40,113                           | \$4,267                                           | 84                                   | 13  | -                                           | 29.9                                   |
| New Zealand                  | Total market                              | East Asia & Pacific | High                       | \$41,792                           | \$4,037                                           | 75                                   | 13  | -                                           | 75.0                                   |
| Singapore                    | Total market                              | East Asia & Pacific | High                       | \$59,798                           | \$2,824                                           | 50                                   | 31  | -                                           | 52.3                                   |
| South Korea                  | Total market                              | East Asia & Pacific | High                       | \$31,489                           | \$2,543                                           | 58                                   | 33  | -                                           | 35.0                                   |
| Taiwan                       | Total market                              | East Asia & Pacific | High <sup>e</sup>          | \$28,371 <sup>e</sup>              | \$1,882 <sup>e</sup>                              | -                                    | -   | -                                           | 41.2                                   |
| China                        | Total market                              | East Asia & Pacific | Upper middle               | \$10,500                           | \$501                                             | 56                                   | 36  | Yes                                         | 116.4                                  |
| Indonesia                    | Total market                              | East Asia & Pacific | Upper middle               | \$3,870                            | \$112                                             | 49                                   | 35  | Yes                                         | 140.3                                  |
| Malaysia                     | Total market                              | East Asia & Pacific | Upper middle               | \$10,402                           | \$427                                             | 51                                   | 35  | Yes                                         | 145.7                                  |
| Thailand                     | Total market                              | East Asia & Pacific | Upper middle               | \$7,189                            | \$276                                             | 76                                   | 11  | Yes                                         | 52.6                                   |
| Philippines                  | Total market                              | East Asia & Pacific | Lower middle               | \$3,299                            | \$137                                             | 33                                   | 54  | Yes                                         | 148.1                                  |
| Vietnam                      | Total market                              | East Asia & Pacific | Lower middle               | \$2,786                            | \$152                                             | 46                                   | 45  | Yes                                         | 95.6                                   |
| Austria                      | Total market                              | Europe              | High                       | \$48,105                           | \$5,326                                           | 73                                   | 18  | -                                           | 83.3                                   |
| Belgium                      | Total market                              | Europe              | High                       | \$44,594                           | \$4,913                                           | 76                                   | 19  | -                                           | 54.8                                   |
| Croatia                      | Total market                              | Europe              | High                       | \$13,828                           | \$1,014                                           | 83                                   | 10  | Yes                                         | 143.8                                  |
| Czech Republic               | Total market                              | Europe              | High                       | \$22,762                           | \$1,766                                           | 83                                   | 14  | Yes                                         | 149.0                                  |
| Denmark                      | Total market                              | Europe              | High                       | \$60,909                           | \$6,217                                           | 84                                   | 14  | -                                           | 55.6                                   |
| Estonia                      | Retail only                               | Europe              | High                       | \$23,312                           | \$1,553                                           | 74                                   | 25  | Yes                                         | 144.2                                  |
| Finland                      | Total market                              | Europe              | High                       | \$49,041                           | \$4,516                                           | 79                                   | 18  | -                                           | 100.6                                  |
| France                       | Total market                              | Europe              | High                       | \$38,625                           | \$4,690                                           | 73                                   | 9   | -                                           | 38.4                                   |
| Germany                      | Total market                              | Europe              | High                       | \$45,724                           | \$5,472                                           | 78                                   | 13  | -                                           | 81.4                                   |
| Greece                       | Retail only                               | Europe              | High                       | \$17,676                           | \$1,567                                           | 52                                   | 36  | -                                           | 91.9                                   |
| Hungary                      | Total market                              | Europe              | High                       | \$15,899                           | \$1,082                                           | 69                                   | 27  | -                                           | 174.6                                  |
| Ireland                      | Total market                              | Europe              | High                       | \$83,813                           | \$5,489                                           | 74                                   | 12  | -                                           | 74.7                                   |
| Italy                        | Total market                              | Europe              | High                       | \$31,676                           | \$2,989                                           | 74                                   | 24  | -                                           | 55.3                                   |
| Latvia                       | Total market                              | Europe              | High                       | \$17,620                           | \$1,101                                           | 60                                   | 39  | Yes                                         | 200.4                                  |
| Lithuania                    | Total market                              | Europe              | High                       | \$19,998                           | \$1,249                                           | 66                                   | 32  | Yes                                         | 222.9                                  |
| Luxembourg                   | Retail only                               | Europe              | High                       | \$115,874                          | \$6,227                                           | 85                                   | 10  | -                                           | 54.2                                   |
| Netherlands                  | Total market                              | Europe              | High                       | \$52,304                           | \$5,307                                           | 65                                   | 11  | -                                           | 47.4                                   |
| Norway                       | Total market                              | Europe              | High                       | \$67,294                           | \$8,239                                           | 85                                   | 14  | -                                           | 55.5                                   |
| Poland                       | Total market                              | Europe              | High                       | \$15,656                           | \$979                                             | 71                                   | 21  | Yes                                         | 130.3                                  |
| Portugal                     | Total market                              | Europe              | High                       | \$22,440                           | \$2,215                                           | 61                                   | 30  | Yes                                         | 45.8                                   |
| Romania                      | Total market                              | Europe              | High                       | \$12,896                           | \$687                                             | 80                                   | 19  | Yes                                         | 177.1                                  |
| Slovak Republic              | Total market                              | Europe              | High                       | \$19,157                           | \$1,300                                           | 79                                   | 19  | Yes                                         | 198.9                                  |
| Slovenia                     | Total market                              | Europe              | High                       | \$25,180                           | \$2,170                                           | 72                                   | 12  | Yes                                         | 59.0                                   |
| Spain                        | Total market                              | Europe              | High                       | \$27,057                           | \$2,736                                           | 70                                   | 22  | -                                           | 45.0                                   |
| Sweden                       | Total market                              | Europe              | High                       | \$51,926                           | \$5,982                                           | 85                                   | 14  | Yes                                         | 73.7                                   |
| Switzerland                  | Total market                              | Europe              | High                       | \$86,602                           | \$9,871                                           | 31                                   | 28  | -                                           | 55.7                                   |
| United Kingdom               | Total market                              | Europe              | High                       | \$40,285                           | \$4,315                                           | 79                                   | 17  | -                                           | 66.8                                   |
| Belarus                      | Total market                              | Europe              | Upper middle               | \$6,411                            | \$356                                             | 70                                   | 25  | Yes                                         | 334.2                                  |
| Bosnia & Herzegovina         | Total market                              | Europe              | Upper middle               | \$6,032                            | \$540                                             | 70                                   | 29  | Yes                                         | 162.9                                  |
| Bulgaria                     | Total market                              | Europe              | Upper middle               | \$9,976                            | \$690                                             | 58                                   | 41  | Yes                                         | 239.1                                  |
| Russia                       | Total market                              | Europe              | Upper middle               | \$10,127                           | \$609                                             | 59                                   | 38  | Yes                                         | 240.6                                  |
| Serbia                       | Total market                              | Europe              | Upper middle               | \$7,666                            | \$617                                             | 59                                   | 38  | Yes                                         | 204.4                                  |
| Ukraine                      | Total market                              | Europe              | Lower middle               | \$3,727                            | \$228                                             | 48                                   | 49  | Yes                                         | 424.2                                  |
| Chile                        | Retail only                               | Latin America       | High                       | \$13,232                           | \$1,456                                           | 51                                   | 33  | Yes                                         | 50.4                                   |
| Uruguay                      | Retail only                               | Latin America       | High                       | \$15,438                           | \$1,590                                           | 73                                   | 17  | Yes                                         | 67.0                                   |
| Argentina                    | Retail only                               | Latin America       | Upper middle               | \$8,442                            | \$1,128                                           | 61                                   | 28  | Yes                                         | 82.1                                   |
| Brazil                       | Total market                              | Latin America       | Upper middle               | \$6,797                            | \$848                                             | 42                                   | 28  | Yes                                         | 74.9                                   |
| Colombia                     | Retail only                               | Latin America       | Upper middle               | \$5,333                            | \$513                                             | 72                                   | 15  | Yes                                         | 75.3                                   |
| Dominican Republic           | Total market                              | Latin America       | Upper middle               | \$7,268                            | \$462                                             | 44                                   | 45  | Yes                                         | 175.6                                  |
| Ecuador                      | Retail only                               | Latin America       | Upper middle               | \$5,600                            | \$516                                             | 52                                   | 40  | Yes                                         | 81.8                                   |
| Mexico                       | Retail only                               | Latin America       | Upper middle               | \$8,347                            | \$520                                             | 50                                   | 42  | Yes                                         | 100.0                                  |
| Peru                         | Retail only                               | Latin America       | Upper middle               | \$6,127                            | \$369                                             | 63                                   | 29  | Yes                                         | 48.7                                   |
| Venezuela                    | Retail only                               | Latin America       | Lower middle <sup>f</sup>  | \$1,739 <sup>f</sup>               | \$257                                             | 48                                   | 38  | Yes                                         | 130.0                                  |
| Central America <sup>g</sup> | Retail only                               |                     |                            |                                    |                                                   |                                      |     |                                             |                                        |
| Panama                       |                                           | Latin America       | High                       | \$12,269                           | \$1,132                                           | 64                                   | 29  | Yes                                         | 58.2                                   |
| Costa Rica                   |                                           | Latin America       | Upper middle               | \$12,077                           | \$910                                             | 72                                   | 22  | Yes                                         | 71.5                                   |
| Guatemala                    |                                           | Latin America       | Upper middle               | \$4,603                            | \$260                                             | 36                                   | 58  | Yes                                         | 106.3                                  |
| El Salvador                  |                                           | Latin America       | Lower middle               | \$3,799                            | \$289                                             | 64                                   | 29  | Yes                                         | 100.4                                  |
| Honduras                     |                                           | Latin America       | Lower middle               | \$2,406                            | \$176                                             | 40                                   | 51  | Yes                                         | 154.8                                  |
| Nicaragua                    |                                           | Latin America       | Lower middle               | \$1,905                            | \$174                                             | 60                                   | 33  | Yes                                         | 148.3                                  |

**eTable A (continued).** Economic and Health Indicators of Countries Examined

|                                  | Drug utilization data source <sup>a</sup> | Region <sup>b</sup> | Income (2020) <sup>b</sup> | GDP per capita (2020) <sup>b</sup> | Health expenditure per capita (2018) <sup>b</sup> | % of health expenditure <sup>b</sup> |     | Statins included in EML (2017) <sup>c</sup> | IHD mortality rate (2019) <sup>d</sup> |
|----------------------------------|-------------------------------------------|---------------------|----------------------------|------------------------------------|---------------------------------------------------|--------------------------------------|-----|---------------------------------------------|----------------------------------------|
|                                  |                                           |                     |                            |                                    |                                                   | Public                               | OOP |                                             |                                        |
| Kuwait                           | Retail only                               | MENA                | High                       | \$32,373                           | \$1,711                                           | 88                                   | 11  | -                                           | 108.5                                  |
| Saudi Arabia                     | Total market                              | MENA                | High                       | \$20,110                           | \$1,485                                           | 62                                   | 14  | -                                           | 205.6                                  |
| United Arab Emirates             | Retail only                               | MENA                | High                       | \$43,103                           | \$1,817                                           | 52                                   | 13  | -                                           | 175.4                                  |
| Algeria                          | Retail only                               | MENA                | Lower middle               | \$3,310                            | \$256                                             | 66                                   | 33  | Yes                                         | 237.3                                  |
| Egypt                            | Retail only                               | MENA                | Lower middle               | \$3,548                            | \$126                                             | 29                                   | 62  | Yes                                         | 359.3                                  |
| Morocco                          | Retail only                               | MENA                | Lower middle               | \$3,009                            | \$175                                             | 40                                   | 47  | Yes                                         | 278.5                                  |
| Tunisia                          | Total market                              | MENA                | Lower middle               | \$3,320                            | \$252                                             | 57                                   | 39  | Yes                                         | 193.5                                  |
| Jordan                           | Retail only                               | MENA                | Upper middle               | \$4,283                            | \$330                                             | 49                                   | 31  | Yes                                         | 121.9                                  |
| Kazakhstan                       | Total market                              | MENA                | Upper middle               | \$9,056                            | \$276                                             | 61                                   | 33  | -                                           | 251.4                                  |
| Lebanon                          | Retail only                               | MENA                | Upper middle               | \$4,891                            | \$686                                             | 50                                   | 33  | Yes                                         | 241.2                                  |
| Turkey                           | Total market                              | MENA                | Upper middle               | \$8,538                            | \$390                                             | 77                                   | 17  | -                                           | 121.0                                  |
| Canada                           | Total market                              | North America       | High                       | \$43,242                           | \$4,995                                           | 73                                   | 15  | No                                          | 63.9                                   |
| United States                    | Total market                              | North America       | High                       | \$63,544                           | \$10,624                                          | 50                                   | 11  | -                                           | 91.0                                   |
| Bangladesh                       | Retail only                               | South Asia          | Lower middle               | \$1,969                            | \$42                                              | 17                                   | 74  | No                                          | 111.2                                  |
| India                            | Total market                              | South Asia          | Lower middle               | \$1,901                            | \$73                                              | 27                                   | 63  | Yes                                         | 150.5                                  |
| Pakistan                         | Retail only                               | South Asia          | Lower middle               | \$1,194                            | \$43                                              | 36                                   | 56  | Yes                                         | 189.3                                  |
| Sri Lanka                        | Retail only                               | South Asia          | Lower middle               | \$3,682                            | \$157                                             | 41                                   | 51  | Yes                                         | 109.0                                  |
| South Africa                     | Total market                              | Sub-Saharan Africa  | Upper middle               | \$5,091                            | \$526                                             | 54                                   | 8   | Yes                                         | 81.4                                   |
| West Africa <sup>g</sup>         | Retail only                               |                     |                            |                                    |                                                   |                                      |     |                                             |                                        |
| Gabon                            |                                           | Sub-Saharan Africa  | Upper middle               | \$7,006                            | \$218                                             | 59                                   | 23  | -                                           | 117.4                                  |
| Benin                            |                                           | Sub-Saharan Africa  | Lower middle               | \$1,291                            | \$31                                              | 20                                   | 45  | -                                           | 113.1                                  |
| Cameroon                         |                                           | Sub-Saharan Africa  | Lower middle               | \$1,499                            | \$54                                              | 6                                    | 76  | -                                           | 115.5                                  |
| Côte d'Ivoire                    |                                           | Sub-Saharan Africa  | Lower middle               | \$2,326                            | \$72                                              | 29                                   | 39  | -                                           | 122.0                                  |
| Senegal                          |                                           | Sub-Saharan Africa  | Lower middle               | \$1,488                            | \$59                                              | 24                                   | 56  | -                                           | 117.6                                  |
| Burkina Faso                     |                                           | Sub-Saharan Africa  | Low                        | \$831                              | \$40                                              | 43                                   | 36  | -                                           | 130.2                                  |
| Chad                             |                                           | Sub-Saharan Africa  | Low                        | \$614                              | \$29                                              | 17                                   | 62  | -                                           | 120.1                                  |
| Democratic Republic of the Congo |                                           | Sub-Saharan Africa  | Low                        | \$557                              | \$19                                              | 15                                   | 42  | -                                           | 114.7                                  |
| Guinea                           |                                           | Sub-Saharan Africa  | Low                        | \$1,194                            | \$38                                              | 16                                   | 61  | -                                           | 123.7                                  |
| Mali                             |                                           | Sub-Saharan Africa  | Low                        | \$859                              | \$35                                              | 28                                   | 34  | -                                           | 116.0                                  |
| Niger                            |                                           | Sub-Saharan Africa  | Low                        | \$565                              | \$30                                              | 33                                   | 49  | -                                           | 118.1                                  |
| Togo                             |                                           | Sub-Saharan Africa  | Low                        | \$915                              | \$42                                              | 17                                   | 56  | -                                           | 134.9                                  |

**Notes:** EML=essential medicines list, IHD=ischemic heart disease, MENA=Middle East and North Africa, OOP=out-of-pocket.

**a** Based on “sell-in” data or the volume purchased by retail (*e.g.*, pharmacies) or non-retail (*e.g.*, hospitals) sectors. As an exception, we used “sell-out” data, or the volume dispensed to patients, in the United Kingdom. We present data on the total market, or retail and non-retail drug sales, for 52 countries. In the 39 countries lacking non-retail sector data, utilization was estimated by interpolation, using the ratio of statin consumption in the retail and non-retail sectors for other countries in their region for which data was available. In 2020, 85% of statins were dispensed via retail sectors (based on countries with data for retail and non-retail sectors). **b** World Bank. **c** World Health Organization. **d** Global Burden Disease, age-standardized IHD mortality rate. **e** Republic of China (Taiwan), Statistical Bureau. **f** Australian Department of Foreign Affairs & Trade, Venezuela Fact Sheet. **g** IQVIA does not provide country specific utilization for this region.

**eTable B.** Statin Utilization in Pre- and Post-COVID-19, October 2019 to September 2020

| <i>Countries/Regions</i> <sup>b</sup> | Statin utilization, No.<br>(DDD per 1000 population ≥ 40 y) <sup>a</sup> |                                   |             |              |
|---------------------------------------|--------------------------------------------------------------------------|-----------------------------------|-------------|--------------|
|                                       | Pre-COVID-19<br>(10/19 to 03/20)                                         | Post-COVID-19<br>(04/20 to 09/20) | <i>p</i>    | Growth,<br>% |
|                                       |                                                                          |                                   |             |              |
| Denmark                               | 331.7                                                                    | 326.1                             | 0.73        | -1.7         |
| Canada                                | 322.9                                                                    | 314.3                             | 0.68        | -2.7         |
| United Kingdom                        | 324.5                                                                    | 308.8                             | 0.14        | -4.8         |
| <b>Australia</b>                      | <b>327.5</b>                                                             | <b>265.2</b>                      | <b>0.26</b> | <b>-19.0</b> |
| <b>Norway</b>                         | <b>304.7</b>                                                             | <b>274.4</b>                      | <b>0.26</b> | <b>-9.9</b>  |
| United States                         | 271.6                                                                    | 271.2                             | .98         | -0.1         |
| <b>Ireland</b>                        | <b>280.3</b>                                                             | <b>257.8</b>                      | <b>0.38</b> | <b>-8.0</b>  |
| Sweden                                | 265.0                                                                    | 255.5                             | 0.61        | -3.6         |
| <b>New Zealand</b>                    | <b>275.3</b>                                                             | <b>243.6</b>                      | <b>0.74</b> | <b>-11.5</b> |
| Greece                                | 250.5                                                                    | 253.7                             | 0.33        | 1.3          |
| Slovenia                              | 250.8                                                                    | 256.1                             | 0.55        | 2.1          |
| <b>Belgium</b>                        | <b>271.5</b>                                                             | <b>243.0</b>                      | <b>0.14</b> | <b>-10.5</b> |
| Czech Republic                        | 241.7                                                                    | 248.3                             | 0.15        | 2.7          |
| Finland                               | 253.0                                                                    | 243.2                             | 0.47        | -3.9         |
| Netherlands                           | 248.8                                                                    | 237.9                             | 0.22        | -4.4         |
| Lebanon                               | 201.9                                                                    | 232.4                             | 0.17        | 15.1         |
| <b>Poland</b>                         | <b>241.2</b>                                                             | <b>202.5</b>                      | <b>0.32</b> | <b>-16.0</b> |
| <b>Austria</b>                        | <b>223.5</b>                                                             | <b>190.8</b>                      | <b>0.18</b> | <b>-14.7</b> |
| <b>Portugal</b>                       | <b>205.4</b>                                                             | <b>184.8</b>                      | <b>0.43</b> | <b>-10.0</b> |
| Spain                                 | 188.6                                                                    | 180.1                             | 0.51        | -4.5         |
| <b>Luxembourg</b>                     | <b>198.1</b>                                                             | <b>176.2</b>                      | <b>0.21</b> | <b>-11.0</b> |
| <b>Latvia</b>                         | <b>193.1</b>                                                             | <b>174.8</b>                      | <b>0.40</b> | <b>-9.5</b>  |
| <b>Hungary</b>                        | <b>192.9</b>                                                             | <b>175.0</b>                      | <b>0.30</b> | <b>-9.3</b>  |
| <b>Switzerland</b>                    | <b>202.8</b>                                                             | <b>170.1</b>                      | <b>0.15</b> | <b>-16.1</b> |
| <b>Germany</b>                        | <b>180.6</b>                                                             | <b>160.6</b>                      | <b>0.27</b> | <b>-11.1</b> |
| <b>Slovak Republic</b>                | <b>175.5</b>                                                             | <b>155.2</b>                      | <b>0.09</b> | <b>-11.6</b> |
| Croatia                               | 156.5                                                                    | 158.3                             | 0.67        | 1.2          |
| <b>Estonia</b>                        | <b>174.5</b>                                                             | <b>148.9</b>                      | <b>0.39</b> | <b>-14.7</b> |
| France                                | 145.8                                                                    | 141.8                             | 0.17        | -2.7         |
| <b>Italy</b>                          | <b>144.7</b>                                                             | <b>135.1</b>                      | <b>0.52</b> | <b>-6.6</b>  |
| <b>Romania</b>                        | <b>141.6</b>                                                             | <b>125.4</b>                      | <b>0.34</b> | <b>-11.4</b> |
| Argentina                             | 108.7                                                                    | 130.2                             | 0.03        | 19.8         |
| Uruguay                               | 116.1                                                                    | 118.1                             | 0.35        | 1.8          |
| Algeria                               | 108.9                                                                    | 111.6                             | 0.88        | 2.5          |
| <b>Lithuania</b>                      | <b>113.8</b>                                                             | <b>106.0</b>                      | <b>0.52</b> | <b>-6.8</b>  |
| Brazil                                | 107.0                                                                    | 112.0                             | 0.25        | 4.7          |
| <b>Thailand</b>                       | <b>102.6</b>                                                             | <b>92.9</b>                       | <b>0.34</b> | <b>-9.4</b>  |
| Singapore                             | 96.6                                                                     | 93.4                              | 0.59        | -3.3         |
| Bulgaria                              | 94.0                                                                     | 90.8                              | 0.50        | -3.4         |
| South Korea                           | 90.5                                                                     | 91.4                              | 0.72        | 1.0          |
| Taiwan                                | 87.0                                                                     | 86.8                              | 0.96        | -0.2         |
| South Africa                          | 83.9                                                                     | 87.8                              | 0.64        | 4.6          |
| <b>United Arab Emirates</b>           | <b>92.7</b>                                                              | <b>77.8</b>                       | <b>0.60</b> | <b>-16.1</b> |
| <b>Serbia</b>                         | <b>85.1</b>                                                              | <b>78.7</b>                       | <b>0.25</b> | <b>-7.5</b>  |
| Saudi Arabia                          | 72.1                                                                     | 81.1                              | 0.26        | 12.4         |
| Turkey                                | 65.0                                                                     | 73.1                              | 0.04        | 12.4         |
| <b>Bosnia</b>                         | <b>70.5</b>                                                              | <b>61.2</b>                       | <b>0.37</b> | <b>-13.2</b> |
| Russia                                | 58.6                                                                     | 66.2                              | 0.08        | 13.0         |
| <b>Tunisia</b>                        | <b>76.5</b>                                                              | <b>52.7</b>                       | <b>0.05</b> | <b>-31.1</b> |
| <b>Malaysia</b>                       | <b>65.9</b>                                                              | <b>53.7</b>                       | <b>0.21</b> | <b>-18.6</b> |
| <b>Belarus</b>                        | <b>55.0</b>                                                              | <b>51.0</b>                       | <b>0.25</b> | <b>-7.2</b>  |
| Japan                                 | 53.2                                                                     | 54.1                              | 0.82        | 1.7          |
| Egypt                                 | 51.4                                                                     | 53.3                              | 0.50        | 3.7          |
| Chile                                 | 45.5                                                                     | 50.6                              | 0.25        | 11.4         |
| Sri Lanka                             | 44.5                                                                     | 50.0                              | 0.14        | 12.4         |
| Dominican Republic                    | 44.7                                                                     | 44.7                              | 0.00        | 0.0          |
| Kuwait                                | 26.3                                                                     | 27.7                              | 0.84        | 5.4          |
| <b>Ukraine</b>                        | <b>32.1</b>                                                              | <b>26.1</b>                       | <b>0.22</b> | <b>-18.7</b> |
| <b>Jordan</b>                         | <b>28.7</b>                                                              | <b>24.1</b>                       | <b>0.50</b> | <b>-16.1</b> |
| Kazakhstan                            | 22.8                                                                     | 22.9                              | 0.97        | 0.8          |
| Bangladesh                            | 20.9                                                                     | 24.9                              | 0.17        | 19.3         |

**eTable B (continued).** Statin Utilization in Pre- and Post-COVID-19, October 2019 to September 2020

| Countries/Regions <sup>b</sup>    | Statin utilization, No.<br>(DDD per 1000 population ≥ 40 y) <sup>a</sup> |                                   |             | Growth,<br>% |
|-----------------------------------|--------------------------------------------------------------------------|-----------------------------------|-------------|--------------|
|                                   | Pre-COVID-19<br>(10/19 to 03/20)                                         | Post-COVID-19<br>(04/20 to 09/20) | <i>p</i>    |              |
|                                   | <b>Mexico</b>                                                            | <b>28.4</b>                       | <b>23.8</b> |              |
| <b>Philippines</b>                | <b>23.2</b>                                                              | <b>21.3</b>                       | <b>0.54</b> | <b>-8.1</b>  |
| Ecuador                           | 18.1                                                                     | 22.3                              | 0.30        | 23.6         |
| Pakistan                          | 20.4                                                                     | 19.4                              | 0.40        | -4.8         |
| China                             | 16.2                                                                     | 18.3                              | 0.17        | 13.3         |
| <b>Vietnam</b>                    | <b>23.3</b>                                                              | <b>17.2</b>                       | <b>0.38</b> | <b>-26.3</b> |
| Central America <sup>c, d</sup>   | 16.1                                                                     | 16.7                              | 0.75        | 4.0          |
| Colombia                          | 14.3                                                                     | 17.3                              | 0.08        | 20.7         |
| <b>Morocco</b>                    | <b>15.5</b>                                                              | <b>15.1</b>                       | <b>0.75</b> | <b>-3.1</b>  |
| India                             | 13.7                                                                     | 14.3                              | <0.01       | 4.3          |
| <b>Venezuela</b>                  | <b>14.5</b>                                                              | <b>14.4</b>                       | <b>0.95</b> | <b>-0.9</b>  |
| Peru                              | 5.9                                                                      | 10.3                              | 0.41        | 74.7         |
| <b>Indonesia</b>                  | <b>10.9</b>                                                              | <b>8.9</b>                        | <b>0.32</b> | <b>-18.3</b> |
| <b>West Africa<sup>c, e</sup></b> | <b>4.0</b>                                                               | <b>2.8</b>                        | <b>0.04</b> | <b>-30.1</b> |

Notes: DDD=defined daily doses; No.=number.

**a** Statistical significance was determined using simple linear regression. Countries in bold declined  $\geq 5\%$ . **b** Sorted based on statin utilization in 2020, refer to **Error! Reference source not found.** **c** IQVIA does not provide country specific utilization for this region. **d** Central American countries included Costa Rica, El Salvador, Honduras, Guatemala, Nicaragua, and Panama. **e** West African countries included Benin, Burkina Faso, Cameroon, Chad, Democratic Republic of the Congo, Gabon, Guinea, Ivory Coast, Mali, Niger, Senegal, and Togo.

# BMJ Open

## GLOBAL, REGIONAL, AND NATIONAL TRENDS IN STATIN UTILIZATION IN HIGH INCOME AND LOW- AND MIDDLE-INCOME COUNTRIES, 2015-2020

|                                 |                                                                                                                                                                                                                                                                                                                                                                                                                                                 |
|---------------------------------|-------------------------------------------------------------------------------------------------------------------------------------------------------------------------------------------------------------------------------------------------------------------------------------------------------------------------------------------------------------------------------------------------------------------------------------------------|
| Journal:                        | <i>BMJ Open</i>                                                                                                                                                                                                                                                                                                                                                                                                                                 |
| Manuscript ID                   | bmjopen-2022-061350.R2                                                                                                                                                                                                                                                                                                                                                                                                                          |
| Article Type:                   | Original research                                                                                                                                                                                                                                                                                                                                                                                                                               |
| Date Submitted by the Author:   | 09-Aug-2022                                                                                                                                                                                                                                                                                                                                                                                                                                     |
| Complete List of Authors:       | Guadamuz, Jenny; University of Southern California, School of Pharmacy<br>Shooshtari, Andrew; University of Southern California School of Pharmacy, Titus Family Department of Clinical Pharmacy<br>Qato, Dima; University of Southern California School of Pharmacy, Program on Medicines and Public Health, Titus Family Department of Clinical Pharmacy; University of Southern California, Schaeffer Center for Health Policy and Economics |
| <b>Primary Subject Heading</b>: | Cardiovascular medicine                                                                                                                                                                                                                                                                                                                                                                                                                         |
| Secondary Subject Heading:      | Cardiovascular medicine, Pharmacology and therapeutics, Public health, Health services research                                                                                                                                                                                                                                                                                                                                                 |
| Keywords:                       | PUBLIC HEALTH, Health policy < HEALTH SERVICES ADMINISTRATION & MANAGEMENT, Ischaemic heart disease < CARDIOLOGY                                                                                                                                                                                                                                                                                                                                |
|                                 |                                                                                                                                                                                                                                                                                                                                                                                                                                                 |

SCHOLARONE™  
Manuscripts



I, the Submitting Author has the right to grant and does grant on behalf of all authors of the Work (as defined in the below author licence), an exclusive licence and/or a non-exclusive licence for contributions from authors who are: i) UK Crown employees; ii) where BMJ has agreed a CC-BY licence shall apply, and/or iii) in accordance with the terms applicable for US Federal Government officers or employees acting as part of their official duties; on a worldwide, perpetual, irrevocable, royalty-free basis to BMJ Publishing Group Ltd ("BMJ") its licensees and where the relevant Journal is co-owned by BMJ to the co-owners of the Journal, to publish the Work in this journal and any other BMJ products and to exploit all rights, as set out in our [licence](#).

The Submitting Author accepts and understands that any supply made under these terms is made by BMJ to the Submitting Author unless you are acting as an employee on behalf of your employer or a postgraduate student of an affiliated institution which is paying any applicable article publishing charge ("APC") for Open Access articles. Where the Submitting Author wishes to make the Work available on an Open Access basis (and intends to pay the relevant APC), the terms of reuse of such Open Access shall be governed by a Creative Commons licence – details of these licences and which [Creative Commons](#) licence will apply to this Work are set out in our licence referred to above.

Other than as permitted in any relevant BMJ Author's Self Archiving Policies, I confirm this Work has not been accepted for publication elsewhere, is not being considered for publication elsewhere and does not duplicate material already published. I confirm all authors consent to publication of this Work and authorise the granting of this licence.

1  
2  
3  
4  
5  
6  
7  
8  
9  
10  
11  
12  
13  
14  
15  
16  
17  
18  
19  
20  
21  
22  
23  
24  
25  
26  
27  
28  
29  
30  
31  
32  
33  
34  
35  
36  
37  
38  
39  
40  
41  
42  
43  
44  
45  
46

**GLOBAL, REGIONAL, AND NATIONAL TRENDS IN STATIN UTILIZATION IN  
HIGH INCOME AND LOW- AND MIDDLE-INCOME COUNTRIES, 2015-2020**

Jenny S. Guadamuz, PhD<sup>1-2</sup>  
Andrew Shooshtari<sup>1</sup>  
Dima M Qato, PharmD, MPH, PhD<sup>1-2</sup>

1. Program on Medicines and Public Health, Titus Family Department of Clinical Pharmacy, University of Southern California School of Pharmacy, Los Angeles, California, USA
2. Leonard D. Schaeffer Center for Health Policy and Economics, University of Southern California, Los Angeles, California, USA

47  
48  
49  
50  
51  
52  
53  
54  
55  
56  
57  
58  
59  
60

**Correspondence**

Dima M Qato, PharmD, MPH, PhD  
USC School of Pharmacy  
1985 Zonal Avenue  
Los Angeles, CA 90089  
Phone: (323) 442-1392  
Email: [qato@usc.edu](mailto:qato@usc.edu)

**Length** Text 2789; abstract 292; references 27, figures 3; tables 1; supplemental materials 2.



## Abstract

**Objective:** Prior studies have reported inequitable global access to essential medicines for cardiovascular disease (CVD) prevention, especially statins. Here we examine recent trends and disparities in statin utilization at the income group, regional, and country levels.

**Design:** Ecologic study. Pharmaceutical sales data was used to examine statin utilization in high-income countries (HICs) and low- and middle-income countries (LMICs) from 2015 to 2020. Population estimates were obtained from the Global Burden of Disease (GBD). Fixed-effects panel regression analysis was used to examine associations between statin utilization and country-level factors.

**Setting:** Global, including 41 high-income countries (HICs) and 50 low- and middle-income countries (LMICs).

**Participants:** Population older than 40 years of age.

**Primary & secondary outcome measures:** Statin utilization was measured using defined daily doses (DDD) per 1000 population  $\geq 40$  years per day (TPD).

**Results:** Globally, statin utilization increased 24.7% from 54.7 DDD/TPD in 2015 to 68.3 DDD/TPD in 2020. However, regional and income group disparities persisted during this period. In 2020, statin utilization was more than six-times higher in HICs than LMIC (192.4 vs. 28.4 DDD/TPD,  $p < 0.01$ ). Substantial disparities were also observed between LMICs, ranging from 3.1 DDDs/TPDs in West African nations to 225.0 DDD/TPD in Lebanon in 2020. While statin utilization increased in most LMIC between 2015 to 2020, several experienced declines in utilization, most notably Venezuela (-85.1%, from 92.3 to 14.0 DDD/TPD). In LMICs, every \$100 increase in per capita health spending was associated with a 17% increase in statin utilization, while every 10% increase in out-of-pocket health spending was associated with a 11% decline (both  $p < 0.05$ ).

**Conclusions:** Despite global increases in statin utilization, there are substantial regional and country-level disparities between HIC and LMICs. To address global CVD disparities, policymakers should promote increased and equitable access to statins in LMICs.

## Strengths and Limitations

- Pharmaceutical sales data was used to examine statin utilization in 41 high-income countries (HICs) and 50 low- and middle-income countries (LMICs) — representing approximately 90% of the global population older than 40 years of age.
- Comparisons between regions, income groups, and countries should be interpreted in the context of the available data and total market coverage of the included countries.
- IQVIA does not provide sales data for most low-income countries; therefore, this study may underestimate the magnitude of statin utilization disparities between HICs and LMICs.
- Relationships between changes in statin utilization and country-level characteristics are not casual.

## INTRODUCTION

Cardiovascular disease (CVD)—primarily ischemic heart disease (IHD)—causes approximately one-third of deaths worldwide.[1] While age-standardized CVD mortality rates have declined globally, the number of deaths due to CVD has increased from 12.1 million in 1990 to 18.6 million in 2019[1] and substantial regional, income group, and country level disparities exist.[2,3] For example, age-standardized CVD mortality rates were lowest in high-income countries (HICs) in Asia-Pacific, Europe, and North America and highest in low- and middle-income countries (LMICs) in Eastern Europe, Middle East and North Africa, and South Asia.[4] Moreover, the CVD burden has increased in nearly every LMIC during the past three decades.[1] Currently, LMICs account for approximately 80% of global CVD deaths.[2]

Medicines, alongside lifestyle changes such as diet, exercise, and smoking cessation, are a cornerstone of CVD prevention.[5] Statins (HMG-CoA reductase inhibitors) are particularly important because they are widely recommended for primary and secondary prevention—that is, among adults with and without known CVD.[5–7] Statins have been included in the World Health Organization (WHO) Model Essential Medicines List (EML)—used to develop national EMLs that guide public procurement—since 2007.[8] Despite statins steadily losing patent protections throughout the world since 2006,[8] only 60% of LMICs include these medicines in their EMLs as of 2017.[9] As medicines included in EMLs have higher availability in the private and public sectors,[10] these policies—as well as differences in income, health spending, and disease burden—may result in global disparities in statin utilization.

While utilization of preventative cardiovascular medicines, including statins, has increased globally in the past decade, large disparities exist.[11,12] For example, a study using pharmaceutical sales data from 65 countries found that consumption of cardiovascular medicines was approximately six-times higher in HICs than in LMICs in 2018.[11] A separate study using sales data from 83 countries found that consumption of lipid-lowering medicines was at least three-times higher in HICs than in LMICs in 2018.[12] However, these studies do not focus on the population at greatest need, adults older than 40 years,[6,7] nor do they evaluate country-level factors associated with statin utilization. Furthermore, an updated analysis of statin utilization is imperative considering the ongoing COVID-19 pandemic that has caused severe disruptions to the pharmaceutical supply chain and the provision of healthcare.[13–15]

This study used global pharmaceutical sales data to estimate statin utilization per population aged 40 years and older in 91 countries from 2015 to 2020. Disparities across and within regions and income groups were examined over time, including in the six months prior to and following the start of the COVID-19 pandemic. To inform global efforts to improve access to essential medicines, we also examined the extent to which country-level factors, such as gross domestic product (GDP), health spending, and underlying IHD burden, are associated with statin utilization.

## Methods

### *Design and Data Sources*

We conducted a cross-sectional study examining trends and disparities in statin utilization in 91 countries using pharmaceutical sales data collected by IQVIA (Multinational Integrated Data

1  
2  
3 140 Analysis System, MIDAS) from January 2015 to October 2020. These countries represent  
4 141 approximately 90% of the global population older than 40 years of age.[16] IQVIA samples  
5 142 pharmaceutical sales from multiple distribution channels (e.g., manufacturers, wholesalers, and  
6 143 medical facilities) to develop nationally representative estimates of retail and non-retail  
7 144 pharmaceutical sales in each country.[17] If necessary, IQVIA projects its samples to represent  
8 145 100% of the retail and non-retail sales in each country and reports >90% global precision in  
9 146 recent years.[17] However, IQVIA does not publicly disclose detailed information on data  
10 147 collection, projection, and validation.  
11  
12 148

13  
14 149 Several sources were used to further characterize these countries. Countries were grouped based  
15 150 on their income and geographical regions per the World Bank (2020).[18] Population estimates  
16 151 and age-standardized IHD mortality rates (GBD 2019 causes of death were mapped to  
17 152 International Classification of Diseases[19]were obtained from the Global Burden of Disease  
18 153 (GBD) (2015-2019).[16] Health expenditures (total, public, out-of-pocket) were also obtained  
19 154 from the World Bank (2015-2018).[20] We projected the values of these estimates through 2020  
20 155 by applying the county-specific growth rates observed from 2015 to 2018 or 2019 (depending on  
21 156 data availability). Finally, whether statins were included in national essential medicine lists was  
22 157 determined, for reference, using the Global Essential Medicines database (2017).[9]  
23 158

### 24 159 *Measuring Statin Utilization*

25 160 We extracted country-level dispensing for WHO Anatomic Therapeutic Chemical codes relating  
26 161 to statins (C10AA).[21] As IQVIA does not report country-specific data for six countries in  
27 162 Centra America (Costa Rica, El Salvador, Guatemala, Honduras, Nicaragua, and Panama) and  
28 163 twelve countries in West Africa (Benin, Burkina Faso, Cameroon, Chad, Côte d'Ivoire,  
29 164 Democratic Republic of Congo, Gabon, Guinea, Mali, Niger, Senegal, and Togo), we examined  
30 165 these countries in aggregate. We examined total market data, or retail and non-retail statin sales,  
31 166 for 52 countries (eTable A). In the 23 countries/groups that lack non-retail sector data, utilization  
32 167 was estimated by interpolation, using the ratio of statin consumption in the retail and non-retail  
33 168 sectors for other countries in their region for which data was available (85% of all statins were  
34 169 dispensed through the retail sector).  
35  
36 170

37  
38 171 To enable international comparisons over time, we converted statin sales (expressed in  
39 172 milligrams) into defined daily doses (DDD) using the Anatomical Therapeutic Chemical  
40 173 Classification System developed by the WHO Collaborating Centre for Drug Statistics  
41 174 Methodology.[21] To account for differences in population size and age distribution, we report  
42 175 statin utilization as DDDs per 1000 population  $\geq 40$  years per day (TPD) for each country.  
43 176 Global, regional, and income group statin utilizations in DDD/TPD were derived by aggregating  
44 177 statin sale and population estimates.  
45  
46 178

### 47 179 *Statistical Analysis*

48 180 Descriptive statistics were used to examine trends and disparities in statin utilization from 2015  
49 181 to 2020. Simple linear regressions were used to determine statistical significance in trends and  
50 182 disparities. Changes in statin utilization in the pre- (October 2019 to March 2020) and post-  
51 183 COVID-19 (April 2020 to October 2020) periods were also evaluated.  
52  
53 184

1  
2  
3 185 Fixed-effects panel regression analysis was used to quantify the association between economic  
4 186 and health indicators and the statin utilization from 2015 to 2020. Annual, country-level statin  
5 187 utilization estimates were logged in these models to enable interpretation as percent change  
6 188 associated with each unit of the independent variables examined. The independent variables  
7 189 included time-varying health expenditure per capita, out-of-pocket health expenditure (as a  
8 190 percentage of total expenditure), and age-standardized IHD mortality rate. Errors were clustered  
9 191 by year and country to account for serial correlation.  
10 192

11 193 All *p*-values are two-sided. STATA version 17.1 was used for all statistical analyses.  
12 194

13 195 This study was considered exempt by the Institutional Review Board at the University of  
14 196 Southern California because this study was not considered human subjects research.  
15 197

### 16 198 *Patient and Public Involvement*

17 199 No patients or members of the public were involved in the design of this study  
18 200

## 19 201 **RESULTS**

20 202 As shown in **Figure 1**, global statin utilization increased 24.7% from 54.7 DDD/TPD in 2015 to  
21 203 68.3 DDD/TPD ( $p<0.01$ ). While statin utilization increased, to varying degrees, in all regions  
22 204 and income groups (all  $p<0.05$ ), disparities persisted. In 2020, statin utilization was highest in  
23 205 North America and Europe (279.7 and 159.9 DDD/TPD, respectively) and substantially lower in  
24 206 Latin America, MENA, East Asia, South Asia, and sub-Saharan Africa (66.1, 64.1, 29.3, 16.1,  
25 207 and 24.7 DDD/TPD, respectively). From 2015 to 2020, statin utilization increased substantially  
26 208 in HICs (19.3% from 161.3 to 192.4 DDD/TPD) and LMICs (57.9% from 18.0 to 28.4  
27 209 DDD/TPD). However, disparities by income group remained throughout this period—by 2020,  
28 210 statin utilization was seven times greater in HICs than in LMICs.  
29 211

30 212 **Figure 2** depicts country-specific variation in statin utilization. From 2015 to 2020, statin  
31 213 utilization increased or remained stable in most HICs, except Singapore (125.2 to 95.0, -24.1%,  
32 214  $p=0.27$ ), the United Arab Emirates (104.4 to 83.9, -19.7%,  $p=0.02$ ), Luxembourg (216.6 to  
33 215 185.3, -14.4%,  $p<0.01$ ), and New Zealand (295.4 to 256.0, -13.4%,  $p=0.12$ ). HICs located in  
34 216 North America and Europe have substantially higher statin utilization than comparable countries  
35 217 located in other regions. For example, in 2020, statin utilization in HICs ranged from over 300  
36 218 DDD/TPD in Denmark, Canada, and United Kingdom to less than 50 DDD/TPD in Japan, Chile,  
37 219 and Kuwait.  
38 220

39 221 From 2015 to 2020, statin utilization increased by more than 10% in nearly all LMICs.  
40 222 Exceptions included India (12.9 to 14.1, 9.1%,  $p=0.02$ ), Malaysia (57.8 to 60.0, 3.9%,  $p=0.41$ ),  
41 223 Ecuador (20.2 to 20.9, 3.6%,  $p=0.09$ ), and Jordan (28.6 to 27.1, -5.4%,  $p=0.20$ ), where  
42 224 utilization remained relatively stable, and Venezuela, where utilization sharply declined (92.3 to  
43 225 13.8, -85.1%,  $p<0.01$ ). Several LMICs had higher statin utilization than the global average in  
44 226 2020, including Lebanon, Algeria, Brazil, Thailand, and South Africa (224.9, 111.8, 109.3,  
45 227 96.8, and 85.4 DDD/TPD, respectively). Statin utilization is lower than 34 DDD/TPD  
46 228 (approximately half the global average) in 35 LMICs, including some of the most populous  
47 229 nations, such as China, India, Indonesia, Pakistan, Bangladesh, and Mexico.  
48 230  
49 231  
50 232  
51 233  
52 234  
53 235  
54 236  
55 237  
56 238  
57 239  
58 240  
59 241  
60 242

231 **Table 1** presents factors associated with changes in statin utilization. In HICs, only health  
232 expenditure per capita was significantly and positively associated with statin utilization. In  
233 LMICs, every \$100 increase in health expenditure per capita was associated with a 17% increase  
234 in utilization, while every 10% increase in out-of-pocket health expenditure (as percentage of  
235 total health expenditure) was associated with a 11% decline in utilization (both  $p < 0.05$ ). Greater  
236 rates of IHD mortality were also positively associated with more statin utilization in LMICs.

237  
238 Compared with the pre-COVID-19 period, statin utilization declined by more than 5.0% in 41  
239 countries, including 19 HICs and 22 LMICs (**Figure 3**). Severe disruptions in statin utilization—  
240 or  $\geq 10\%$  decline—were found in 13 HICs, including Australia (327.5 to 265.2 DDD/TPD, -  
241 19.0%), the United Arab Emirates (92.7 to 77.8 DDD/TPD, -16.1%), and Germany (180.6 to  
242 160.6 DDD/TPD, -11.1%) (**eTable B**). Some of the most severe disruptions in statin utilization  
243 were observed among LMICs, including in Tunisia (76.5 to 52.7 DDD/TPD, -31.1%), Vietnam  
244 (23.3 to 17.2 DDD/TPD, -26.3%), Ukraine (32.1 to 26.1 DDD/TPD, -18.7%), and Mexico  
245 (28.4 to 23.8 DDD/TPD, -16.3%).

## 246 247 **DISCUSSION**

248 Using a global database, representing approximately 90% of the global population older than 40  
249 years of age,[16] we found persistent disparities across regions, income groups, and countries in  
250 statin utilization which may contribute to worsening disparities in CVD mortality. While global  
251 statin utilization has increased 25% from 2015 to 2020, statin utilization remains higher in the  
252 “global north” (e.g., North America, Europe, and Oceania) and in HICs than countries in other  
253 regions and LMICs.[4] In 2020, statin utilization was seventeen times higher in North America  
254 versus South Asia—the region with the highest age-adjusted CVD mortality rate in the  
255 world[4]—and seven times higher in HICs versus LMICs—that are experiencing a near universal  
256 increase in the number of CVD deaths.[1]

257  
258 Statin utilization is also substantially lower in countries with disproportionately high age-  
259 standardized CVD mortality rates, namely LMICs in South Asia, MENA, and sub-Saharan  
260 Africa.[4] The WHO Global Non-Communicable Disease (NCD) Action Plan 2013-2020 aimed  
261 for a 25% reduction in premature deaths from NCD, especially CVD, from 2010 to 2025 by  
262 ensuring that at least half of adults at high CVD risk receive cardiovascular medicines and that  
263 80% of public and private facilities have these essential medicines available on-site.[22] Growth  
264 in statin utilization in LMICs was concentrated among those countries with worsening IHD  
265 mortality—suggesting reactionary policies for the management of CVD morbidity and mortality  
266 versus preventative strategies for the provision of essential medicines. Together, our findings  
267 suggest that global efforts to reduce the burden of CVD need to be strengthened—statin  
268 utilization remains inequitable and suboptimal in LMICs, including those with worsening rates  
269 of CVD mortality.

270  
271 Importantly, there is a substantial gap between CVD burden and statin utilization between HIC  
272 and LMICs. For example, statin utilization is very low (less than half the global average) in 70%  
273 of the LMICs examined, yet account for 68% of the global population of middle aged and older  
274 adults and 55% CVD deaths worldwide.[16] Forty-two percent of CVD deaths occur in China  
275 (25%), India (14%), and Indonesia (4%),[16] all of whom have very low statin utilization and  
276 together account for less than 11% of statins dispensed in the world. From 2015 to 2019, the IHD

1  
2  
3 277 mortality rate has declined or remained stable in most LMICs, with notable exceptions of  
4 278 Bangladesh (5%), Malaysia (5%), and Venezuela (10%) that have experienced substantial  
5 279 increases in recent years.[16] These countries, with worsening IHD mortality, have  
6 280 comparatively low statin utilization in given their regional and income group averages. However,  
7 281 Venezuela has also experienced substantial declines in statin utilization in this period—  
8 282 aggravating the IHD burden experienced by its populace.  
9 283

10 283  
11 284 Among LMICs, we found that every \$100 increase in per capita health spending was associated  
12 285 with a 17% increase in statin utilization and that every 10% increase in the proportion of out-of-  
13 286 pocket health spending was associated with an 11% decline. These findings suggest that policy  
14 287 efforts to address global disparities in statin utilization, may need to increase health spending  
15 288 while shifting the burden of health spending from individuals to the public sector (either via the  
16 289 direct provision of healthcare and medicines or via insurance schemes). Unfortunately, public  
17 290 investment in health (as measured by government health spending as a percentage of total  
18 291 expenditures) has declined in LMICs during the last two decades.[23] Only high-income and  
19 292 upper-middle countries have seen moderate increases in government health spending,[23]  
20 293 countries that consume a disproportionate share of statins. Out-of-pocket spending as a share of  
21 294 total health spending has remained stubbornly high in LMICs (above 40% and twice the  
22 295 percentage in HICs) during this period.[23] International aid—a major source of health spending  
23 296 in LMICs—is disproportionately directed to communicable diseases,[23] and these policies may  
24 297 aggravate global disparities in the use of essential medicines, including statins, and hinder efforts  
25 298 to reduce CVD mortality. International aid for health, which could alleviate costs of essential  
26 299 medicines for governments and the public, has also stagnated since 2013.[23]  
27 300

28 300  
29 301 Economic or political crises, which are often followed by sharp declines in total health spending,  
30 302 may also impact access to essential medicines. The starkest example is Venezuela, where statin  
31 303 utilization declined 85% between 2015 to 2020. The ongoing sociopolitical crisis began in 2010  
32 304 and has spiraled into a sustained period of hyperinflation, a 75% decline in health spending, as  
33 305 well as widespread and chronic shortages of essential medicines in the past decade.[20,24]  
34 306  
35 306

36 306  
37 307 Pharmaceutical supply chain disruptions have resulted from slowdowns in the production of  
38 308 medicines that impact domestic and international markets, transportation hurdles, and restrictions  
39 309 on movement (internationally and domestically and by providers and patients).[25] For example,  
40 310 early in the pandemic, active pharmaceutical ingredient production in China was severely  
41 311 curtailed—leading to shortages and delays in the production of medicines throughout the world,  
42 312 including in the United States, the European Union, and India.[26]  
43 313

44 313  
45 314 During the first six months of COVID-19 pandemic, statin utilization declined by more than 5%  
46 315 in 41 countries. As a whole, HICs experienced greater declines in statin utilization during the  
47 316 post-COVID-19 period (-2% versus -4% observed worldwide). Perhaps, because HICs had more  
48 317 severe restrictions on movement to mitigate COVID-19 spread than LMICs early in the  
49 318 pandemic.[27] However, the most severe disruptions in individual countries occurred in LMICs,  
50 319 which may be more vulnerable to supply chain disruptions. Several countries in Eastern Europe  
51 320 (*e.g.*, Serbia, Bosnia, Belarus, and Ukraine), Southeast Asia (*e.g.*, Thailand, Malaysia, the  
52 321 Philippines, Vietnam, and Indonesia), and MENA (*e.g.*, Tunisia and Jordan) saw dramatic  
53 322 declines in statin utilization, as did West Africa as a region and Mexico. Global COVID-19  
54 322  
55 322  
56  
57  
58  
59  
60

1  
2  
3 323 disparities, including inequitable access to vaccinations,[27] may result in persistent disruptions  
4 324 to statins access in LMICs, as countries prioritize acute health needs. If these trends continue, the  
5 325 COVID-19 pandemic may halt or reverse gains in statin utilization and worsen regional and  
6 326 country level CVD disparities between HIC and LMICs.  
7 327

### 8 328 *Limitations*

9 329 This study had several limitations. First, comparisons between regions, income groups, and  
10 330 countries should be interpreted in the context of the available data and total market coverage of  
11 331 the included countries. For example, IQVIA does not provide non-retail sales for 39 of the 91  
12 332 countries examined. However, 85% of all statins were dispensed through retail pharmacies, and  
13 333 we account for missing non-retail sales through interpolation (using the ratio of statin  
14 334 consumption in the retail and non-retail sectors for other countries in their region for which data  
15 335 was available). Second, IQVIA does not provide sales data for most low-income countries;  
16 336 therefore, this study may underestimate the magnitude of statin utilization disparities between  
17 337 HICs and LMICs. Finally, relationships between changes in statin utilization and country-level  
18 338 characteristics are not casual. However, the trends and disparities in statin utilization described in  
19 339 this study help evaluate the global progress in ensuring equitable access to essential medicines  
20 340 and inform efforts to reduce the global burden of CVD.  
21 341

### 22 342 **Conclusion**

23 343 Despite a 25% increase in global statin utilization from 2015 to 2020, there are substantial and  
24 344 persistent regional and country-level disparities between HIC and LMICs. To address worsening  
25 345 CVD disparities, global, regional, and national policymakers should promote increased and  
26 346 equitable access to statins in LMICs.  
27  
28  
29  
30  
31  
32  
33  
34  
35  
36  
37  
38  
39  
40  
41  
42  
43  
44  
45  
46  
47  
48  
49  
50  
51  
52  
53  
54  
55  
56  
57  
58  
59  
60



1  
2  
3 347 **Contributorship Statement**

4 348 Dr. Guadamuz developed the methodology, conducted the analyses, wrote the first draft, and  
5 349 received funding for the study. Mr. Shooshtari provided administrative support and supplied  
6 350 suggestions for the analyses, data interpretation, and article drafting. Dr. Qato provided critical  
7 351 revisions to the article resulting in improvements to the design, analyses, and interpretations, and  
8 352 received funding for the study. All authors reviewed, revised, and approved the final version of  
9 353 the article.  
10 354

11 355 **Funding Statement**

12 356 Dr. Guadamuz was supported by the Robert Wood Johnson Foundation Health Policy Research  
13 357 Scholars program. Dr. Qato was supported by the Robert Wood Johnson Foundation Clinical  
14 358 Scholars program. Data obtained under license from IQVIA as part of IQVIA Institute's Human  
15 359 Data Science Research Collaborative in the Era of COVID-19. The funders, the Robert Wood  
16 360 Johnson Foundation, and IQVIA, had no role in the design and conduct of the study, analysis or  
17 361 interpretation of the data, and preparation, or final approval of the article before publication.  
18 362

19 363 **Competing Interests Statement**

20 364 Dr. Guadamuz current reports employment with Flatiron Health, Inc, which is an independent  
21 365 subsidiary of the Roche Group. Flatiron Health, Inc., had no role in the design and conduct of the  
22 366 study, analysis or interpretation of the data, and preparation, or final approval of the article  
23 367 before publication.  
24 368

25 369 **Ethical Approval Statement**

26 370 This study was considered exempt by the Institutional Review Board at the University of  
27 371 Southern California because this study was not considered human subjects research.  
28 372

29 373 **Data Sharing Statement**

30 374 Data for this study will not be made available due to licensing agreements with IQVIA.  
31 375  
32 376

377 **REFERENCES**

- 378
- 379 1. Roth GA, Mensah GA, Johnson CO, Addolorato G, Ammirati E, Baddour LM, et al.  
380 Global Burden of Cardiovascular Diseases and Risk Factors, 1990–2019. *Journal of the*  
381 *American College of Cardiology*. 2020 Dec 10;76(25):2982–3021.
- 382 2. Bowry ADK, Lewey J, Dugani SB, Choudhry NK. The Burden of Cardiovascular Disease  
383 in Low- and Middle-Income Countries : *Epidemiology and Management*. *Canadian*  
384 *Journal of Cardiology*. 2020;31(9):1151–9.
- 385 3. Barquera S, Pedroza-Tobías A, Medina C, Hernández-Barrera L, Bibbins-Domingo K,  
386 Lozano R, et al. Global Overview of the Epidemiology of Atherosclerotic Cardiovascular  
387 Disease. *Archives of Medical Research*. 2015;46(5):328–38.
- 388 4. Roth GA, Johnson C, Abajobir A, Abd-Allah F, Abera SF, Abyu G, et al. Global,  
389 Regional, and National Burden of Cardiovascular Diseases for 10 Causes, 1990 to 2015.  
390 *Journal of the American College of Cardiology*. 2017;70(1):1–25.
- 391 5. World Health Organization. Prevention of Cardiovascular Disease: Guidelines for  
392 assessment and management of cardiovascular risk [Internet]. 2007 [cited 2021 Oct 24].  
393 Available from: [https://www.who.int/cardiovascular\\_diseases/guidelines](https://www.who.int/cardiovascular_diseases/guidelines)
- 394 6. Grundy SM, Stone NJ, Bailey AL et al. 2018  
395 ACC/AHA/AACVPR/AAPA/ABC/ACPM/ADA/AGS/ APhA/ASPC/NLA/PCNA  
396 Guideline on the Management of Blood Cholesterol: A Report of the American College of  
397 Cardiology Foundation/American Heart Association Task Force on Clinical Practice  
398 Guidelines. *J Am Coll Cardiol*. 2018;
- 399 7. Arnett DK, Blumenthal RS, Albert MA, Buroker AB, Goldberger ZD, Hahn EJ, et al.  
400 2019 ACC/AHA Guideline on the Primary Prevention of Cardiovascular Disease: A  
401 Report of the American College of Cardiology/American Heart Association Task Force on  
402 Clinical Practice Guidelines. *Circulation*. 2019 Sep 10;140(11):e596–646.
- 403 8. Kishore SP, Blank E, Heller DJ, Patel A, Peters A, Price M, et al. Modernizing the World  
404 Health Organization List of Essential Medicines for Preventing and Controlling  
405 Cardiovascular Diseases. *Journal of the American College of Cardiology*.  
406 2018;71(5):564–74.
- 407 9. World Health Organization. Global Essential Medicine [Internet]. 2019 [cited 2021 Jul  
408 25]. Available from: <https://global.essentialmeds.org/>
- 409 10. Bazargani YT, Ewen M, de Boer A, Leufkens HGM, Mantel-Teeuwisse AK. Essential  
410 medicines are more available than other medicines around the globe. *PloS one*. 2014 Feb  
411 12;9(2):e87576–e87576.
- 412 11. Yan VKC, Blais JE, Li X, Chui CSL, Wei L, Yan BP, et al. Trends in Cardiovascular  
413 Medicine Use in 65 Middle- and High-Income Countries. *Journal of the American College*  
414 *of Cardiology*. 2021;77(7):1021–3.
- 415 12. Blais JE, Wei Y, Yap KKW, Alwafi H, Ma TT, Brauer R, et al. Trends in lipid-modifying  
416 agent use in 83 countries. *Atherosclerosis*. 2021;328:44–51.
- 417 13. Alexander GC, Qato DM. Ensuring Access to Medications in the US During the COVID-  
418 19 Pandemic. *JAMA*. 2020 Jul 7;324(1):31–2.
- 419 14. Lakavage A. Covid-19 has exposed cracks in the global medicines supply chain [Internet].  
420 *STAT*. 2020 [cited 2021 Oct 24]. Available from:  
421 [https://www.statnews.com/2020/06/02/covid-19-exposed-cracks-global-medicines-supply-](https://www.statnews.com/2020/06/02/covid-19-exposed-cracks-global-medicines-supply-chain/)  
422 [chain/](https://www.statnews.com/2020/06/02/covid-19-exposed-cracks-global-medicines-supply-chain/)

15. World Health Organization. COVID-19 continues to disrupt essential health services in 90% of countries [Internet]. 2021 [cited 2021 Oct 24]. Available from: <https://www.who.int/news/item/23-04-2021-covid-19-continues-to-disrupt-essential-health-services-in-90-of-countries>
16. Institute for Health Metrics and Evaluation. Global Burden of Disease Study 2019 [Internet]. 2021 [cited 2021 Dec 12]. Available from: <http://www.healthdata.org/gbd>
17. IQVIA. Accuracy and Timeliness Statistics Annual Report, 2020 [Internet]. 2021 [cited 2021 Jul 25]. Available from: <https://www.iqvia.com/library/publications/acts-2020>
18. World Bank Data. World Bank Country and Lending Groups [Internet]. 2021 [cited 2021 Jul 25]. Available from: <https://datahelpdesk.worldbank.org/knowledgebase/articles/906519-world-bank-country-and-lending-groups>
19. Institute for Health Metrics and Evaluation. Global Burden of Disease Study 2019 (GBD 2019) Cause List Mapped to ICD Codes [Internet]. 2021 [cited 2022 May 27]. Available from: <https://ghdx.healthdata.org/record/ihme-data/gbd-2019-cause-icd-code-mappings>
20. World Bank. World Bank Open Data [Internet]. 2021 [cited 2021 Jul 25]. Available from: <https://data.worldbank.org/>
21. WHO Collaborating Centre for Drug Statistics Methodology. Purpose of the ATC/DDD system [Internet]. [cited 2020 Apr 6]. Available from: [https://www.whocc.no/atc\\_ddd\\_methodology/purpose\\_of\\_the\\_atc\\_ddd\\_system/](https://www.whocc.no/atc_ddd_methodology/purpose_of_the_atc_ddd_system/)
22. World Health Organization (WHO). Global Action Plan for the Prevention and Control of Noncommunicable Diseases 2013-2020. 2013.
23. World Health Organization (WHO). Global spending on health: Weathering the storm. 2020.
24. Raphelson S. Venezuela's Health Care System Ready To Collapse Amid Economic Crisis [Internet]. NPR. 2018 [cited 2021 Dec 26]. Available from: <https://www.npr.org/2018/02/01/582469305/venezuelas-health-care-system-ready-to-collapse-amid-economic-crisis>
25. McDonell A, Chalkidou K, Yadav P, Rosen D. Understanding the Impact Of COVID-19 On Essential Medicine Supply Chains [Internet]. Center For Global Development. 2020 [cited 2021 Dec 26]. Available from: <https://www.cgdev.org/blog/understanding-impact-covid-19-essential-medicine-supply-chains>
26. Mullin R. COVID-19 is reshaping the pharmaceutical supply chain. Chem Eng News. 2020 Apr 27;98(16):31–5.
27. Eyawo O, Viens AM, Ugoji UC. Lockdowns and low- and middle-income countries: building a feasible, effective, and ethical COVID-19 response strategy. Globalization and Health. 2021 Dec 1;17(1):1–5.

**Table 1.** Factors Associated with Statin Utilization, 2015 to 2020

|                                                 | Exponentiated Coefficient (CI) <sup>a</sup> |                                 |
|-------------------------------------------------|---------------------------------------------|---------------------------------|
|                                                 | High-income countries                       | Low-and middle-income countries |
| No. <sup>b</sup>                                | 40                                          | 33                              |
| Health expenditure per capita (\$) <sup>c</sup> | 1·01 (1·01, 1·02)*                          | 1·17 (1·12, 1·22)*              |
| OOP health expenditure (%) <sup>d</sup>         | 0·99 (0·91, 1·09)                           | 0·89 (0·82, 0·96)*              |
| IHD mortality rate <sup>e</sup>                 | 1·00 (0·99, 1·02)                           | 1·02 (1·01, 1·03)*              |

**Notes:** IHD=ischemic heart disease, OOP=out-of-pocket, No.=number.

**a** Statin utilization is defined as defined daily doses per 1000 population  $\geq$  40 y per day. Here logged statin utilization is examined. Data for 2020 is based on statin utilization from January to September 2020. **b** Countries in Central America and West Africa were excluded because IQVIA does not report country-specific information for these regions. **c** Increments of 100. **d** Increments of 10. **e** Age-standardized IHD mortality rate, increments of 10. \*  $p < 0\cdot05$

### Figure Legends

#### Figure 1. Statin Utilization by Geographical Region and Income, 2015 to 2020

**Notes:** DDD=defined daily doses; MENA=Middle East and North Africa; No.=number.

**a** All trends in statin utilization were statistically significant ( $p < 0\cdot05$ ), per simple linear regression. **b** We captured statin utilization for 91 countries. **c** Based on data from January to September 2020

#### Figure 2. Statin Utilization by Country, 2015 to 2020

**Notes:** DDD=defined daily doses; No.=number. Data for 2020 is based on statin utilization from January to September 2020. “Very low utilization” refers to utilization  $< \frac{1}{2}$  global statin utilization

#### Figure 3. Change in Statin Utilization in Pre- and Post-COVID-19, October 2019 to September 2020

**Notes:** DDD=defined daily doses; No.=number. Pre-COVID-19 includes the period of October 2019 to March 2020 and post-COVID-19 includes the period of April 2020 to October 2020.

**Figure 1.** Statin Utilization by Geographical Region and Income, 2015 to 2020**a. By Region**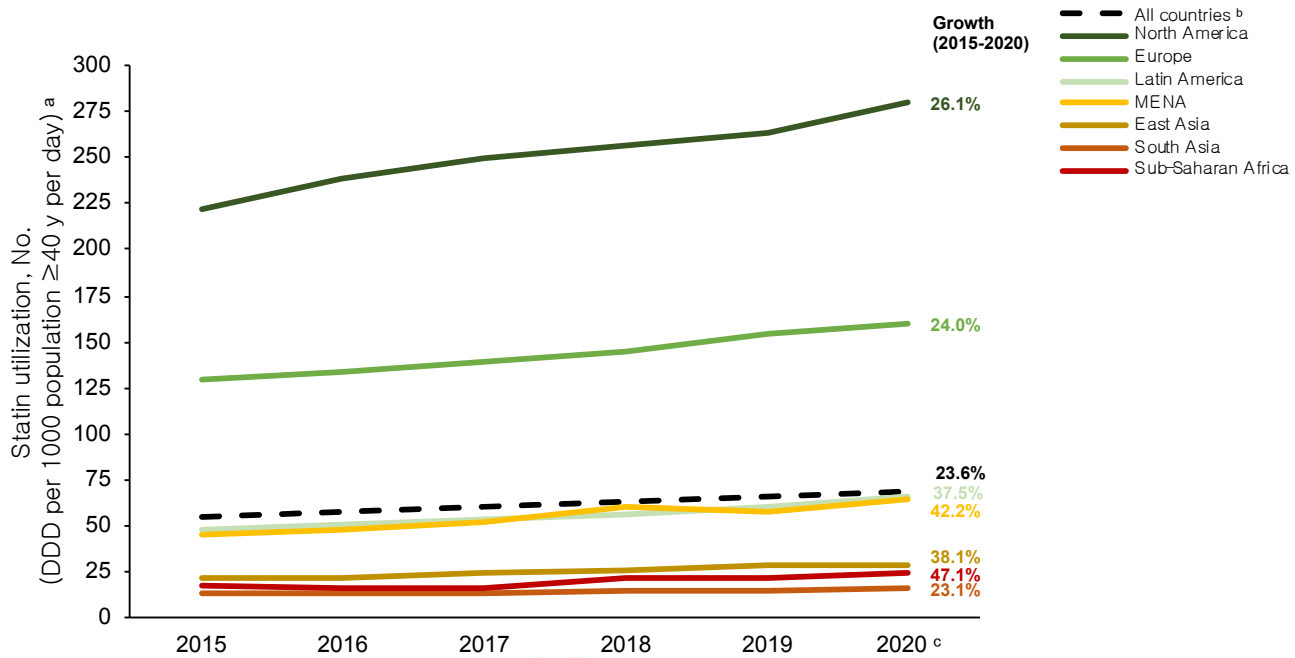**b. By Income**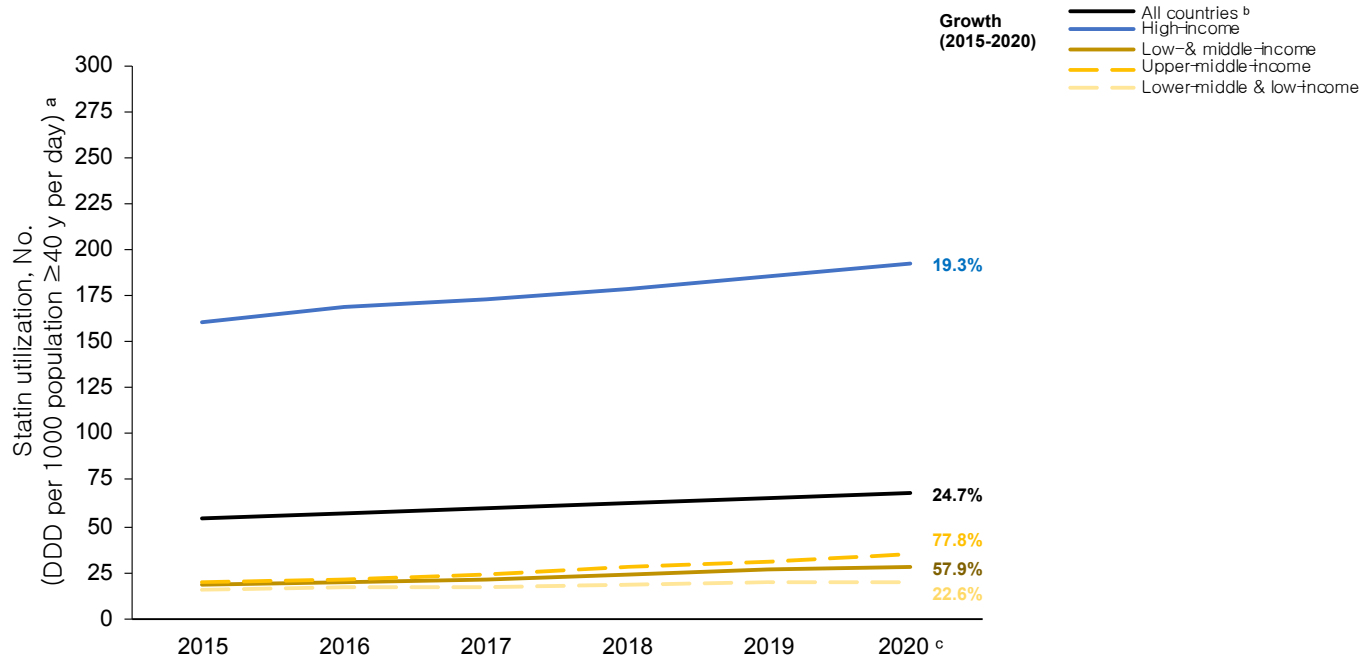

**Notes:** DDD=defined daily doses; MENA=Middle East and North Africa; No.=number.

**a** All trends in statin utilization were statistically significant ( $p < 0.05$ ), per simple linear regression. **b** We captured statin utilization for 91 countries. **c** Based on data from January to September 2020.

**Figure 2.** Statin Utilization by Country, 2015 to 2020

a. Change in statin utilization, 2015 to 2020



b. Statin utilization, 2020



**Notes:** DDD=defined daily doses; No.=number. Data for 2020 is based on statin utilization from January to September 2020. “Very low utilization” refers to utilization < ½ global statin utilization.

**Figure 3.** Change in Statin Utilization in Pre- and Post-COVID-19, October 2019 to September 2020



**Notes:** DDD=defined daily doses; No.=number. Pre-COVID-19 includes the period of October 2019 to March 2020 and post-COVID-19 includes the period of April 2020 to October 2020.

## ONLINE SUPPLEMENT

eTable A. Economic and Health Indicators of Countries Examined

|                              | Drug utilization data source <sup>a</sup> | Region <sup>b</sup> | Income (2020) <sup>b</sup> | GDP per capita (2020) <sup>b</sup> | Health expenditure per capita (2018) <sup>b</sup> | % of health expenditure <sup>b</sup> |     | Statins included in EML (2017) <sup>c</sup> | IHD mortality rate (2019) <sup>d</sup> |
|------------------------------|-------------------------------------------|---------------------|----------------------------|------------------------------------|---------------------------------------------------|--------------------------------------|-----|---------------------------------------------|----------------------------------------|
|                              |                                           |                     |                            |                                    |                                                   | Public                               | OOP |                                             |                                        |
| Australia                    | Total market                              | East Asia & Pacific | High                       | \$51,812                           | \$5,425                                           | 69                                   | 18  | -                                           | 56.1                                   |
| Japan                        | Total market                              | East Asia & Pacific | High                       | \$40,113                           | \$4,267                                           | 84                                   | 13  | -                                           | 29.9                                   |
| New Zealand                  | Total market                              | East Asia & Pacific | High                       | \$41,792                           | \$4,037                                           | 75                                   | 13  | -                                           | 75.0                                   |
| Singapore                    | Total market                              | East Asia & Pacific | High                       | \$59,798                           | \$2,824                                           | 50                                   | 31  | -                                           | 52.3                                   |
| South Korea                  | Total market                              | East Asia & Pacific | High                       | \$31,489                           | \$2,543                                           | 58                                   | 33  | -                                           | 35.0                                   |
| Taiwan                       | Total market                              | East Asia & Pacific | High <sup>e</sup>          | \$28,371 <sup>e</sup>              | \$1,882 <sup>e</sup>                              | -                                    | -   | -                                           | 41.2                                   |
| China                        | Total market                              | East Asia & Pacific | Upper middle               | \$10,500                           | \$501                                             | 56                                   | 36  | Yes                                         | 116.4                                  |
| Indonesia                    | Total market                              | East Asia & Pacific | Upper middle               | \$3,870                            | \$112                                             | 49                                   | 35  | Yes                                         | 140.3                                  |
| Malaysia                     | Total market                              | East Asia & Pacific | Upper middle               | \$10,402                           | \$427                                             | 51                                   | 35  | Yes                                         | 145.7                                  |
| Thailand                     | Total market                              | East Asia & Pacific | Upper middle               | \$7,189                            | \$276                                             | 76                                   | 11  | Yes                                         | 52.6                                   |
| Philippines                  | Total market                              | East Asia & Pacific | Lower middle               | \$3,299                            | \$137                                             | 33                                   | 54  | Yes                                         | 148.1                                  |
| Vietnam                      | Total market                              | East Asia & Pacific | Lower middle               | \$2,786                            | \$152                                             | 46                                   | 45  | Yes                                         | 95.6                                   |
| Austria                      | Total market                              | Europe              | High                       | \$48,105                           | \$5,326                                           | 73                                   | 18  | -                                           | 83.3                                   |
| Belgium                      | Total market                              | Europe              | High                       | \$44,594                           | \$4,913                                           | 76                                   | 19  | -                                           | 54.8                                   |
| Croatia                      | Total market                              | Europe              | High                       | \$13,828                           | \$1,014                                           | 83                                   | 10  | Yes                                         | 143.8                                  |
| Czech Republic               | Total market                              | Europe              | High                       | \$22,762                           | \$1,766                                           | 83                                   | 14  | Yes                                         | 149.0                                  |
| Denmark                      | Total market                              | Europe              | High                       | \$60,909                           | \$6,217                                           | 84                                   | 14  | -                                           | 55.6                                   |
| Estonia                      | Retail only                               | Europe              | High                       | \$23,312                           | \$1,553                                           | 74                                   | 25  | Yes                                         | 144.2                                  |
| Finland                      | Total market                              | Europe              | High                       | \$49,041                           | \$4,516                                           | 79                                   | 18  | -                                           | 100.6                                  |
| France                       | Total market                              | Europe              | High                       | \$38,625                           | \$4,690                                           | 73                                   | 9   | -                                           | 38.4                                   |
| Germany                      | Total market                              | Europe              | High                       | \$45,724                           | \$5,472                                           | 78                                   | 13  | -                                           | 81.4                                   |
| Greece                       | Retail only                               | Europe              | High                       | \$17,676                           | \$1,567                                           | 52                                   | 36  | -                                           | 91.9                                   |
| Hungary                      | Total market                              | Europe              | High                       | \$15,899                           | \$1,082                                           | 69                                   | 27  | -                                           | 174.6                                  |
| Ireland                      | Total market                              | Europe              | High                       | \$83,813                           | \$5,489                                           | 74                                   | 12  | -                                           | 74.7                                   |
| Italy                        | Total market                              | Europe              | High                       | \$31,676                           | \$2,989                                           | 74                                   | 24  | -                                           | 55.3                                   |
| Latvia                       | Total market                              | Europe              | High                       | \$17,620                           | \$1,101                                           | 60                                   | 39  | Yes                                         | 200.4                                  |
| Lithuania                    | Total market                              | Europe              | High                       | \$19,998                           | \$1,249                                           | 66                                   | 32  | Yes                                         | 222.9                                  |
| Luxembourg                   | Retail only                               | Europe              | High                       | \$115,874                          | \$6,227                                           | 85                                   | 10  | -                                           | 54.2                                   |
| Netherlands                  | Total market                              | Europe              | High                       | \$52,304                           | \$5,307                                           | 65                                   | 11  | -                                           | 47.4                                   |
| Norway                       | Total market                              | Europe              | High                       | \$67,294                           | \$8,239                                           | 85                                   | 14  | -                                           | 55.5                                   |
| Poland                       | Total market                              | Europe              | High                       | \$15,656                           | \$979                                             | 71                                   | 21  | Yes                                         | 130.3                                  |
| Portugal                     | Total market                              | Europe              | High                       | \$22,440                           | \$2,215                                           | 61                                   | 30  | Yes                                         | 45.8                                   |
| Romania                      | Total market                              | Europe              | High                       | \$12,896                           | \$687                                             | 80                                   | 19  | Yes                                         | 177.1                                  |
| Slovak Republic              | Total market                              | Europe              | High                       | \$19,157                           | \$1,300                                           | 79                                   | 19  | Yes                                         | 198.9                                  |
| Slovenia                     | Total market                              | Europe              | High                       | \$25,180                           | \$2,170                                           | 72                                   | 12  | Yes                                         | 59.0                                   |
| Spain                        | Total market                              | Europe              | High                       | \$27,057                           | \$2,736                                           | 70                                   | 22  | -                                           | 45.0                                   |
| Sweden                       | Total market                              | Europe              | High                       | \$51,926                           | \$5,982                                           | 85                                   | 14  | Yes                                         | 73.7                                   |
| Switzerland                  | Total market                              | Europe              | High                       | \$86,602                           | \$9,871                                           | 31                                   | 28  | -                                           | 55.7                                   |
| United Kingdom               | Total market                              | Europe              | High                       | \$40,285                           | \$4,315                                           | 79                                   | 17  | -                                           | 66.8                                   |
| Belarus                      | Total market                              | Europe              | Upper middle               | \$6,411                            | \$356                                             | 70                                   | 25  | Yes                                         | 334.2                                  |
| Bosnia & Herzegovina         | Total market                              | Europe              | Upper middle               | \$6,032                            | \$540                                             | 70                                   | 29  | Yes                                         | 162.9                                  |
| Bulgaria                     | Total market                              | Europe              | Upper middle               | \$9,976                            | \$690                                             | 58                                   | 41  | Yes                                         | 239.1                                  |
| Russia                       | Total market                              | Europe              | Upper middle               | \$10,127                           | \$609                                             | 59                                   | 38  | Yes                                         | 240.6                                  |
| Serbia                       | Total market                              | Europe              | Upper middle               | \$7,666                            | \$617                                             | 59                                   | 38  | Yes                                         | 204.4                                  |
| Ukraine                      | Total market                              | Europe              | Lower middle               | \$3,727                            | \$228                                             | 48                                   | 49  | Yes                                         | 424.2                                  |
| Chile                        | Retail only                               | Latin America       | High                       | \$13,232                           | \$1,456                                           | 51                                   | 33  | Yes                                         | 50.4                                   |
| Uruguay                      | Retail only                               | Latin America       | High                       | \$15,438                           | \$1,590                                           | 73                                   | 17  | Yes                                         | 67.0                                   |
| Argentina                    | Retail only                               | Latin America       | Upper middle               | \$8,442                            | \$1,128                                           | 61                                   | 28  | Yes                                         | 82.1                                   |
| Brazil                       | Total market                              | Latin America       | Upper middle               | \$6,797                            | \$848                                             | 42                                   | 28  | Yes                                         | 74.9                                   |
| Colombia                     | Retail only                               | Latin America       | Upper middle               | \$5,333                            | \$513                                             | 72                                   | 15  | Yes                                         | 75.3                                   |
| Dominican Republic           | Total market                              | Latin America       | Upper middle               | \$7,268                            | \$462                                             | 44                                   | 45  | Yes                                         | 175.6                                  |
| Ecuador                      | Retail only                               | Latin America       | Upper middle               | \$5,600                            | \$516                                             | 52                                   | 40  | Yes                                         | 81.8                                   |
| Mexico                       | Retail only                               | Latin America       | Upper middle               | \$8,347                            | \$520                                             | 50                                   | 42  | Yes                                         | 100.0                                  |
| Peru                         | Retail only                               | Latin America       | Upper middle               | \$6,127                            | \$369                                             | 63                                   | 29  | Yes                                         | 48.7                                   |
| Venezuela                    | Retail only                               | Latin America       | Lower middle <sup>f</sup>  | \$1,739 <sup>f</sup>               | \$257                                             | 48                                   | 38  | Yes                                         | 130.0                                  |
| Central America <sup>g</sup> | Retail only                               |                     |                            |                                    |                                                   |                                      |     |                                             |                                        |
| Panama                       |                                           | Latin America       | High                       | \$12,269                           | \$1,132                                           | 64                                   | 29  | Yes                                         | 58.2                                   |
| Costa Rica                   |                                           | Latin America       | Upper middle               | \$12,077                           | \$910                                             | 72                                   | 22  | Yes                                         | 71.5                                   |
| Guatemala                    |                                           | Latin America       | Upper middle               | \$4,603                            | \$260                                             | 36                                   | 58  | Yes                                         | 106.3                                  |
| El Salvador                  |                                           | Latin America       | Lower middle               | \$3,799                            | \$289                                             | 64                                   | 29  | Yes                                         | 100.4                                  |
| Honduras                     |                                           | Latin America       | Lower middle               | \$2,406                            | \$176                                             | 40                                   | 51  | Yes                                         | 154.8                                  |
| Nicaragua                    |                                           | Latin America       | Lower middle               | \$1,905                            | \$174                                             | 60                                   | 33  | Yes                                         | 148.3                                  |



**eTable A (continued).** Economic and Health Indicators of Countries Examined

|                                  | Drug utilization data source <sup>a</sup> | Region <sup>b</sup> | Income (2020) <sup>b</sup> | GDP per capita (2020) <sup>b</sup> | Health expenditure per capita (2018) <sup>b</sup> | % of health expenditure <sup>b</sup> |     | Statins included in EML (2017) <sup>c</sup> | IHD mortality rate (2019) <sup>d</sup> |
|----------------------------------|-------------------------------------------|---------------------|----------------------------|------------------------------------|---------------------------------------------------|--------------------------------------|-----|---------------------------------------------|----------------------------------------|
|                                  |                                           |                     |                            |                                    |                                                   | Public                               | OOP |                                             |                                        |
| Kuwait                           | Retail only                               | MENA                | High                       | \$32,373                           | \$1,711                                           | 88                                   | 11  | -                                           | 108.5                                  |
| Saudi Arabia                     | Total market                              | MENA                | High                       | \$20,110                           | \$1,485                                           | 62                                   | 14  | -                                           | 205.6                                  |
| United Arab Emirates             | Retail only                               | MENA                | High                       | \$43,103                           | \$1,817                                           | 52                                   | 13  | -                                           | 175.4                                  |
| Algeria                          | Retail only                               | MENA                | Lower middle               | \$3,310                            | \$256                                             | 66                                   | 33  | Yes                                         | 237.3                                  |
| Egypt                            | Retail only                               | MENA                | Lower middle               | \$3,548                            | \$126                                             | 29                                   | 62  | Yes                                         | 359.3                                  |
| Morocco                          | Retail only                               | MENA                | Lower middle               | \$3,009                            | \$175                                             | 40                                   | 47  | Yes                                         | 278.5                                  |
| Tunisia                          | Total market                              | MENA                | Lower middle               | \$3,320                            | \$252                                             | 57                                   | 39  | Yes                                         | 193.5                                  |
| Jordan                           | Retail only                               | MENA                | Upper middle               | \$4,283                            | \$330                                             | 49                                   | 31  | Yes                                         | 121.9                                  |
| Kazakhstan                       | Total market                              | MENA                | Upper middle               | \$9,056                            | \$276                                             | 61                                   | 33  | -                                           | 251.4                                  |
| Lebanon                          | Retail only                               | MENA                | Upper middle               | \$4,891                            | \$686                                             | 50                                   | 33  | Yes                                         | 241.2                                  |
| Turkey                           | Total market                              | MENA                | Upper middle               | \$8,538                            | \$390                                             | 77                                   | 17  | -                                           | 121.0                                  |
| Canada                           | Total market                              | North America       | High                       | \$43,242                           | \$4,995                                           | 73                                   | 15  | No                                          | 63.9                                   |
| United States                    | Total market                              | North America       | High                       | \$63,544                           | \$10,624                                          | 50                                   | 11  | -                                           | 91.0                                   |
| Bangladesh                       | Retail only                               | South Asia          | Lower middle               | \$1,969                            | \$42                                              | 17                                   | 74  | No                                          | 111.2                                  |
| India                            | Total market                              | South Asia          | Lower middle               | \$1,901                            | \$73                                              | 27                                   | 63  | Yes                                         | 150.5                                  |
| Pakistan                         | Retail only                               | South Asia          | Lower middle               | \$1,194                            | \$43                                              | 36                                   | 56  | Yes                                         | 189.3                                  |
| Sri Lanka                        | Retail only                               | South Asia          | Lower middle               | \$3,682                            | \$157                                             | 41                                   | 51  | Yes                                         | 109.0                                  |
| South Africa                     | Total market                              | Sub-Saharan Africa  | Upper middle               | \$5,091                            | \$526                                             | 54                                   | 8   | Yes                                         | 81.4                                   |
| West Africa <sup>9</sup>         | Retail only                               |                     |                            |                                    |                                                   |                                      |     |                                             |                                        |
| Gabon                            |                                           | Sub-Saharan Africa  | Upper middle               | \$7,006                            | \$218                                             | 59                                   | 23  | -                                           | 117.4                                  |
| Benin                            |                                           | Sub-Saharan Africa  | Lower middle               | \$1,291                            | \$31                                              | 20                                   | 45  | -                                           | 113.1                                  |
| Cameroon                         |                                           | Sub-Saharan Africa  | Lower middle               | \$1,499                            | \$54                                              | 6                                    | 76  | -                                           | 115.5                                  |
| Côte d'Ivoire                    |                                           | Sub-Saharan Africa  | Lower middle               | \$2,326                            | \$72                                              | 29                                   | 39  | -                                           | 122.0                                  |
| Senegal                          |                                           | Sub-Saharan Africa  | Lower middle               | \$1,488                            | \$59                                              | 24                                   | 56  | -                                           | 117.6                                  |
| Burkina Faso                     |                                           | Sub-Saharan Africa  | Low                        | \$831                              | \$40                                              | 43                                   | 36  | -                                           | 130.2                                  |
| Chad                             |                                           | Sub-Saharan Africa  | Low                        | \$614                              | \$29                                              | 17                                   | 62  | -                                           | 120.1                                  |
| Democratic Republic of the Congo |                                           | Sub-Saharan Africa  | Low                        | \$557                              | \$19                                              | 15                                   | 42  | -                                           | 114.7                                  |
| Guinea                           |                                           | Sub-Saharan Africa  | Low                        | \$1,194                            | \$38                                              | 16                                   | 61  | -                                           | 123.7                                  |
| Mali                             |                                           | Sub-Saharan Africa  | Low                        | \$859                              | \$35                                              | 28                                   | 34  | -                                           | 116.0                                  |
| Niger                            |                                           | Sub-Saharan Africa  | Low                        | \$565                              | \$30                                              | 33                                   | 49  | -                                           | 118.1                                  |
| Togo                             |                                           | Sub-Saharan Africa  | Low                        | \$915                              | \$42                                              | 17                                   | 56  | -                                           | 134.9                                  |

**Notes:** EML=essential medicines list, IHD=ischemic heart disease, MENA=Middle East and North Africa, OOP=out-of-pocket.

**a** Based on “sell-in” data or the volume purchased by retail (*e.g.*, pharmacies) or non-retail (*e.g.*, hospitals) sectors. As an exception, we used “sell-out” data, or the volume dispensed to patients, in the United Kingdom. We present data on the total market, or retail and non-retail drug sales, for 52 countries. In the 39 countries lacking non-retail sector data, utilization was estimated by interpolation, using the ratio of statin consumption in the retail and non-retail sectors for other countries in their region for which data was available. In 2020, 85% of statins were dispensed via retail sectors (based on countries with data for retail and non-retail sectors). **b** World Bank. **c** World Health Organization. **d** Global Burden Disease, age-standardized IHD mortality rate. **e** Republic of China (Taiwan), Statistical Bureau. **f** Australian Department of Foreign Affairs & Trade, Venezuela Fact Sheet. **g** IQVIA does not provide country specific utilization for this region.

**eTable B.** Statin Utilization in Pre- and Post-COVID-19, October 2019 to September 2020

| <i>Countries/Regions</i> <sup>b</sup> | Statin utilization, No.                       |                                   |             |              |
|---------------------------------------|-----------------------------------------------|-----------------------------------|-------------|--------------|
|                                       | (DDD per 1000 population ≥ 40 y) <sup>a</sup> |                                   |             |              |
|                                       | Pre-COVID-19<br>(10/19 to 03/20)              | Post-COVID-19<br>(04/20 to 09/20) | <i>p</i>    | Growth,<br>% |
| Denmark                               | 331.7                                         | 326.1                             | 0.73        | -1.7         |
| Canada                                | 322.9                                         | 314.3                             | 0.68        | -2.7         |
| United Kingdom                        | 324.5                                         | 308.8                             | 0.14        | -4.8         |
| <b>Australia</b>                      | <b>327.5</b>                                  | <b>265.2</b>                      | <b>0.26</b> | <b>-19.0</b> |
| <b>Norway</b>                         | <b>304.7</b>                                  | <b>274.4</b>                      | <b>0.26</b> | <b>-9.9</b>  |
| United States                         | 271.6                                         | 271.2                             | .98         | -0.1         |
| <b>Ireland</b>                        | <b>280.3</b>                                  | <b>257.8</b>                      | <b>0.38</b> | <b>-8.0</b>  |
| Sweden                                | 265.0                                         | 255.5                             | 0.61        | -3.6         |
| <b>New Zealand</b>                    | <b>275.3</b>                                  | <b>243.6</b>                      | <b>0.74</b> | <b>-11.5</b> |
| Greece                                | 250.5                                         | 253.7                             | 0.33        | 1.3          |
| Slovenia                              | 250.8                                         | 256.1                             | 0.55        | 2.1          |
| <b>Belgium</b>                        | <b>271.5</b>                                  | <b>243.0</b>                      | <b>0.14</b> | <b>-10.5</b> |
| Czech Republic                        | 241.7                                         | 248.3                             | 0.15        | 2.7          |
| Finland                               | 253.0                                         | 243.2                             | 0.47        | -3.9         |
| Netherlands                           | 248.8                                         | 237.9                             | 0.22        | -4.4         |
| Lebanon                               | 201.9                                         | 232.4                             | 0.17        | 15.1         |
| <b>Poland</b>                         | <b>241.2</b>                                  | <b>202.5</b>                      | <b>0.32</b> | <b>-16.0</b> |
| <b>Austria</b>                        | <b>223.5</b>                                  | <b>190.8</b>                      | <b>0.18</b> | <b>-14.7</b> |
| <b>Portugal</b>                       | <b>205.4</b>                                  | <b>184.8</b>                      | <b>0.43</b> | <b>-10.0</b> |
| Spain                                 | 188.6                                         | 180.1                             | 0.51        | -4.5         |
| <b>Luxembourg</b>                     | <b>198.1</b>                                  | <b>176.2</b>                      | <b>0.21</b> | <b>-11.0</b> |
| <b>Latvia</b>                         | <b>193.1</b>                                  | <b>174.8</b>                      | <b>0.40</b> | <b>-9.5</b>  |
| <b>Hungary</b>                        | <b>192.9</b>                                  | <b>175.0</b>                      | <b>0.30</b> | <b>-9.3</b>  |
| <b>Switzerland</b>                    | <b>202.8</b>                                  | <b>170.1</b>                      | <b>0.15</b> | <b>-16.1</b> |
| <b>Germany</b>                        | <b>180.6</b>                                  | <b>160.6</b>                      | <b>0.27</b> | <b>-11.1</b> |
| <b>Slovak Republic</b>                | <b>175.5</b>                                  | <b>155.2</b>                      | <b>0.09</b> | <b>-11.6</b> |
| Croatia                               | 156.5                                         | 158.3                             | 0.67        | 1.2          |
| <b>Estonia</b>                        | <b>174.5</b>                                  | <b>148.9</b>                      | <b>0.39</b> | <b>-14.7</b> |
| France                                | 145.8                                         | 141.8                             | 0.17        | -2.7         |
| <b>Italy</b>                          | <b>144.7</b>                                  | <b>135.1</b>                      | <b>0.52</b> | <b>-6.6</b>  |
| <b>Romania</b>                        | <b>141.6</b>                                  | <b>125.4</b>                      | <b>0.34</b> | <b>-11.4</b> |
| Argentina                             | 108.7                                         | 130.2                             | 0.03        | 19.8         |
| Uruguay                               | 116.1                                         | 118.1                             | 0.35        | 1.8          |
| Algeria                               | 108.9                                         | 111.6                             | 0.88        | 2.5          |
| <b>Lithuania</b>                      | <b>113.8</b>                                  | <b>106.0</b>                      | <b>0.52</b> | <b>-6.8</b>  |
| Brazil                                | 107.0                                         | 112.0                             | 0.25        | 4.7          |
| <b>Thailand</b>                       | <b>102.6</b>                                  | <b>92.9</b>                       | <b>0.34</b> | <b>-9.4</b>  |
| Singapore                             | 96.6                                          | 93.4                              | 0.59        | -3.3         |
| Bulgaria                              | 94.0                                          | 90.8                              | 0.50        | -3.4         |
| South Korea                           | 90.5                                          | 91.4                              | 0.72        | 1.0          |
| Taiwan                                | 87.0                                          | 86.8                              | 0.96        | -0.2         |
| South Africa                          | 83.9                                          | 87.8                              | 0.64        | 4.6          |
| <b>United Arab Emirates</b>           | <b>92.7</b>                                   | <b>77.8</b>                       | <b>0.60</b> | <b>-16.1</b> |
| <b>Serbia</b>                         | <b>85.1</b>                                   | <b>78.7</b>                       | <b>0.25</b> | <b>-7.5</b>  |
| Saudi Arabia                          | 72.1                                          | 81.1                              | 0.26        | 12.4         |
| Turkey                                | 65.0                                          | 73.1                              | 0.04        | 12.4         |
| <b>Bosnia</b>                         | <b>70.5</b>                                   | <b>61.2</b>                       | <b>0.37</b> | <b>-13.2</b> |
| Russia                                | 58.6                                          | 66.2                              | 0.08        | 13.0         |
| <b>Tunisia</b>                        | <b>76.5</b>                                   | <b>52.7</b>                       | <b>0.05</b> | <b>-31.1</b> |
| <b>Malaysia</b>                       | <b>65.9</b>                                   | <b>53.7</b>                       | <b>0.21</b> | <b>-18.6</b> |
| <b>Belarus</b>                        | <b>55.0</b>                                   | <b>51.0</b>                       | <b>0.25</b> | <b>-7.2</b>  |
| Japan                                 | 53.2                                          | 54.1                              | 0.82        | 1.7          |
| Egypt                                 | 51.4                                          | 53.3                              | 0.50        | 3.7          |
| Chile                                 | 45.5                                          | 50.6                              | 0.25        | 11.4         |
| Sri Lanka                             | 44.5                                          | 50.0                              | 0.14        | 12.4         |
| Dominican Republic                    | 44.7                                          | 44.7                              | 0.00        | 0.0          |
| Kuwait                                | 26.3                                          | 27.7                              | 0.84        | 5.4          |
| <b>Ukraine</b>                        | <b>32.1</b>                                   | <b>26.1</b>                       | <b>0.22</b> | <b>-18.7</b> |
| <b>Jordan</b>                         | <b>28.7</b>                                   | <b>24.1</b>                       | <b>0.50</b> | <b>-16.1</b> |
| Kazakhstan                            | 22.8                                          | 22.9                              | 0.97        | 0.8          |
| Bangladesh                            | 20.9                                          | 24.9                              | 0.17        | 19.3         |

**eTable B (continued).** Statin Utilization in Pre- and Post-COVID-19, October 2019 to September 2020

| <i>Countries/Regions</i> <sup>b</sup> | Statin utilization, No.<br>(DDD per 1000 population $\geq$ 40 y) <sup>a</sup> |                                   |             | Growth,<br>% |
|---------------------------------------|-------------------------------------------------------------------------------|-----------------------------------|-------------|--------------|
|                                       | Pre-COVID-19<br>(10/19 to 03/20)                                              | Post-COVID-19<br>(04/20 to 09/20) | <i>p</i>    |              |
|                                       | <b>Mexico</b>                                                                 | <b>28.4</b>                       | <b>23.8</b> |              |
| <b>Philippines</b>                    | <b>23.2</b>                                                                   | <b>21.3</b>                       | <b>0.54</b> | <b>-8.1</b>  |
| Ecuador                               | 18.1                                                                          | 22.3                              | 0.30        | 23.6         |
| Pakistan                              | 20.4                                                                          | 19.4                              | 0.40        | -4.8         |
| China                                 | 16.2                                                                          | 18.3                              | 0.17        | 13.3         |
| <b>Vietnam</b>                        | <b>23.3</b>                                                                   | <b>17.2</b>                       | <b>0.38</b> | <b>-26.3</b> |
| Central America <sup>c, d</sup>       | 16.1                                                                          | 16.7                              | 0.75        | 4.0          |
| Colombia                              | 14.3                                                                          | 17.3                              | 0.08        | 20.7         |
| <b>Morocco</b>                        | <b>15.5</b>                                                                   | <b>15.1</b>                       | <b>0.75</b> | <b>-3.1</b>  |
| India                                 | 13.7                                                                          | 14.3                              | <0.01       | 4.3          |
| <b>Venezuela</b>                      | <b>14.5</b>                                                                   | <b>14.4</b>                       | <b>0.95</b> | <b>-0.9</b>  |
| Peru                                  | 5.9                                                                           | 10.3                              | 0.41        | 74.7         |
| <b>Indonesia</b>                      | <b>10.9</b>                                                                   | <b>8.9</b>                        | <b>0.32</b> | <b>-18.3</b> |
| <b>West Africa</b> <sup>c, e</sup>    | <b>4.0</b>                                                                    | <b>2.8</b>                        | <b>0.04</b> | <b>-30.1</b> |

**Notes:** DDD=defined daily doses; No.=number.

**a** Statistical significance was determined using simple linear regression. Countries in bold declined  $\geq$ 5%. **b** Sorted based on statin utilization in 2020, refer to **Error! Reference source not found.** **c** IQVIA does not provide country specific utilization for this region. **d** Central American countries included Costa Rica, El Salvador, Honduras, Guatemala, Nicaragua, and Panama. **e** West African countries included Benin, Burkina Faso, Cameroon, Chad, Democratic Republic of the Congo, Gabon, Guinea, Ivory Coast, Mali, Niger, Senegal, and Togo.
