# Supplementary material for: Global, regional and national trends in statin utilisation in high-income and low/middle-income countries, 2015–2020
Source: HighWire-hosted journal article supplement (doi:10.1136/bmjopen-2022-061350), 2022-09-01
Supplement: bmjopen-2022-061350supp001_data_supplement.pdf [file bmjopen-2022-061350supp001_data_supplement.pdf]

## ONLINE SUPPLEMENT

eTable A. Economic and Health Indicators of Countries Examined

|                              | Drug utilization data source <sup>a</sup> | Region <sup>b</sup> | Income (2020) <sup>b</sup> | GDP per capita (2020) <sup>b</sup> | Health expenditure per capita (2018) <sup>b</sup> | % of health expenditure <sup>b</sup> |     | Statins included in EML (2017) <sup>c</sup> | IHD mortality rate (2019) <sup>d</sup> |
|------------------------------|-------------------------------------------|---------------------|----------------------------|------------------------------------|---------------------------------------------------|--------------------------------------|-----|---------------------------------------------|----------------------------------------|
|                              |                                           |                     |                            |                                    |                                                   | Public                               | OOP |                                             |                                        |
| Australia                    | Total market                              | East Asia & Pacific | High                       | \$51,812                           | \$5,425                                           | 69                                   | 18  | -                                           | 56.1                                   |
| Japan                        | Total market                              | East Asia & Pacific | High                       | \$40,113                           | \$4,267                                           | 84                                   | 13  | -                                           | 29.9                                   |
| New Zealand                  | Total market                              | East Asia & Pacific | High                       | \$41,792                           | \$4,037                                           | 75                                   | 13  | -                                           | 75.0                                   |
| Singapore                    | Total market                              | East Asia & Pacific | High                       | \$59,798                           | \$2,824                                           | 50                                   | 31  | -                                           | 52.3                                   |
| South Korea                  | Total market                              | East Asia & Pacific | High                       | \$31,489                           | \$2,543                                           | 58                                   | 33  | -                                           | 35.0                                   |
| Taiwan                       | Total market                              | East Asia & Pacific | High <sup>e</sup>          | \$28,371 <sup>e</sup>              | \$1,882 <sup>e</sup>                              | -                                    | -   | -                                           | 41.2                                   |
| China                        | Total market                              | East Asia & Pacific | Upper middle               | \$10,500                           | \$501                                             | 56                                   | 36  | Yes                                         | 116.4                                  |
| Indonesia                    | Total market                              | East Asia & Pacific | Upper middle               | \$3,870                            | \$112                                             | 49                                   | 35  | Yes                                         | 140.3                                  |
| Malaysia                     | Total market                              | East Asia & Pacific | Upper middle               | \$10,402                           | \$427                                             | 51                                   | 35  | Yes                                         | 145.7                                  |
| Thailand                     | Total market                              | East Asia & Pacific | Upper middle               | \$7,189                            | \$276                                             | 76                                   | 11  | Yes                                         | 52.6                                   |
| Philippines                  | Total market                              | East Asia & Pacific | Lower middle               | \$3,299                            | \$137                                             | 33                                   | 54  | Yes                                         | 148.1                                  |
| Vietnam                      | Total market                              | East Asia & Pacific | Lower middle               | \$2,786                            | \$152                                             | 46                                   | 45  | Yes                                         | 95.6                                   |
| Austria                      | Total market                              | Europe              | High                       | \$48,105                           | \$5,326                                           | 73                                   | 18  | -                                           | 83.3                                   |
| Belgium                      | Total market                              | Europe              | High                       | \$44,594                           | \$4,913                                           | 76                                   | 19  | -                                           | 54.8                                   |
| Croatia                      | Total market                              | Europe              | High                       | \$13,828                           | \$1,014                                           | 83                                   | 10  | Yes                                         | 143.8                                  |
| Czech Republic               | Total market                              | Europe              | High                       | \$22,762                           | \$1,766                                           | 83                                   | 14  | Yes                                         | 149.0                                  |
| Denmark                      | Total market                              | Europe              | High                       | \$60,909                           | \$6,217                                           | 84                                   | 14  | -                                           | 55.6                                   |
| Estonia                      | Retail only                               | Europe              | High                       | \$23,312                           | \$1,553                                           | 74                                   | 25  | Yes                                         | 144.2                                  |
| Finland                      | Total market                              | Europe              | High                       | \$49,041                           | \$4,516                                           | 79                                   | 18  | -                                           | 100.6                                  |
| France                       | Total market                              | Europe              | High                       | \$38,625                           | \$4,690                                           | 73                                   | 9   | -                                           | 38.4                                   |
| Germany                      | Total market                              | Europe              | High                       | \$45,724                           | \$5,472                                           | 78                                   | 13  | -                                           | 81.4                                   |
| Greece                       | Retail only                               | Europe              | High                       | \$17,676                           | \$1,567                                           | 52                                   | 36  | -                                           | 91.9                                   |
| Hungary                      | Total market                              | Europe              | High                       | \$15,899                           | \$1,082                                           | 69                                   | 27  | -                                           | 174.6                                  |
| Ireland                      | Total market                              | Europe              | High                       | \$83,813                           | \$5,489                                           | 74                                   | 12  | -                                           | 74.7                                   |
| Italy                        | Total market                              | Europe              | High                       | \$31,676                           | \$2,989                                           | 74                                   | 24  | -                                           | 55.3                                   |
| Latvia                       | Total market                              | Europe              | High                       | \$17,620                           | \$1,101                                           | 60                                   | 39  | Yes                                         | 200.4                                  |
| Lithuania                    | Total market                              | Europe              | High                       | \$19,998                           | \$1,249                                           | 66                                   | 32  | Yes                                         | 222.9                                  |
| Luxembourg                   | Retail only                               | Europe              | High                       | \$115,874                          | \$6,227                                           | 85                                   | 10  | -                                           | 54.2                                   |
| Netherlands                  | Total market                              | Europe              | High                       | \$52,304                           | \$5,307                                           | 65                                   | 11  | -                                           | 47.4                                   |
| Norway                       | Total market                              | Europe              | High                       | \$67,294                           | \$8,239                                           | 85                                   | 14  | -                                           | 55.5                                   |
| Poland                       | Total market                              | Europe              | High                       | \$15,656                           | \$979                                             | 71                                   | 21  | Yes                                         | 130.3                                  |
| Portugal                     | Total market                              | Europe              | High                       | \$22,440                           | \$2,215                                           | 61                                   | 30  | Yes                                         | 45.8                                   |
| Romania                      | Total market                              | Europe              | High                       | \$12,896                           | \$687                                             | 80                                   | 19  | Yes                                         | 177.1                                  |
| Slovak Republic              | Total market                              | Europe              | High                       | \$19,157                           | \$1,300                                           | 79                                   | 19  | Yes                                         | 198.9                                  |
| Slovenia                     | Total market                              | Europe              | High                       | \$25,180                           | \$2,170                                           | 72                                   | 12  | Yes                                         | 59.0                                   |
| Spain                        | Total market                              | Europe              | High                       | \$27,057                           | \$2,736                                           | 70                                   | 22  | -                                           | 45.0                                   |
| Sweden                       | Total market                              | Europe              | High                       | \$51,926                           | \$5,982                                           | 85                                   | 14  | Yes                                         | 73.7                                   |
| Switzerland                  | Total market                              | Europe              | High                       | \$86,602                           | \$9,871                                           | 31                                   | 28  | -                                           | 55.7                                   |
| United Kingdom               | Total market                              | Europe              | High                       | \$40,285                           | \$4,315                                           | 79                                   | 17  | -                                           | 66.8                                   |
| Belarus                      | Total market                              | Europe              | Upper middle               | \$6,411                            | \$356                                             | 70                                   | 25  | Yes                                         | 334.2                                  |
| Bosnia & Herzegovina         | Total market                              | Europe              | Upper middle               | \$6,032                            | \$540                                             | 70                                   | 29  | Yes                                         | 162.9                                  |
| Bulgaria                     | Total market                              | Europe              | Upper middle               | \$9,976                            | \$690                                             | 58                                   | 41  | Yes                                         | 239.1                                  |
| Russia                       | Total market                              | Europe              | Upper middle               | \$10,127                           | \$609                                             | 59                                   | 38  | Yes                                         | 240.6                                  |
| Serbia                       | Total market                              | Europe              | Upper middle               | \$7,666                            | \$617                                             | 59                                   | 38  | Yes                                         | 204.4                                  |
| Ukraine                      | Total market                              | Europe              | Lower middle               | \$3,727                            | \$228                                             | 48                                   | 49  | Yes                                         | 424.2                                  |
| Chile                        | Retail only                               | Latin America       | High                       | \$13,232                           | \$1,456                                           | 51                                   | 33  | Yes                                         | 50.4                                   |
| Uruguay                      | Retail only                               | Latin America       | High                       | \$15,438                           | \$1,590                                           | 73                                   | 17  | Yes                                         | 67.0                                   |
| Argentina                    | Retail only                               | Latin America       | Upper middle               | \$8,442                            | \$1,128                                           | 61                                   | 28  | Yes                                         | 82.1                                   |
| Brazil                       | Total market                              | Latin America       | Upper middle               | \$6,797                            | \$848                                             | 42                                   | 28  | Yes                                         | 74.9                                   |
| Colombia                     | Retail only                               | Latin America       | Upper middle               | \$5,333                            | \$513                                             | 72                                   | 15  | Yes                                         | 75.3                                   |
| Dominican Republic           | Total market                              | Latin America       | Upper middle               | \$7,268                            | \$462                                             | 44                                   | 45  | Yes                                         | 175.6                                  |
| Ecuador                      | Retail only                               | Latin America       | Upper middle               | \$5,600                            | \$516                                             | 52                                   | 40  | Yes                                         | 81.8                                   |
| Mexico                       | Retail only                               | Latin America       | Upper middle               | \$8,347                            | \$520                                             | 50                                   | 42  | Yes                                         | 100.0                                  |
| Peru                         | Retail only                               | Latin America       | Upper middle               | \$6,127                            | \$369                                             | 63                                   | 29  | Yes                                         | 48.7                                   |
| Venezuela                    | Retail only                               | Latin America       | Lower middle <sup>f</sup>  | \$1,739 <sup>f</sup>               | \$257                                             | 48                                   | 38  | Yes                                         | 130.0                                  |
| Central America <sup>g</sup> | Retail only                               |                     |                            |                                    |                                                   |                                      |     |                                             |                                        |
| Panama                       |                                           | Latin America       | High                       | \$12,269                           | \$1,132                                           | 64                                   | 29  | Yes                                         | 58.2                                   |
| Costa Rica                   |                                           | Latin America       | Upper middle               | \$12,077                           | \$910                                             | 72                                   | 22  | Yes                                         | 71.5                                   |
| Guatemala                    |                                           | Latin America       | Upper middle               | \$4,603                            | \$260                                             | 36                                   | 58  | Yes                                         | 106.3                                  |
| El Salvador                  |                                           | Latin America       | Lower middle               | \$3,799                            | \$289                                             | 64                                   | 29  | Yes                                         | 100.4                                  |
| Honduras                     |                                           | Latin America       | Lower middle               | \$2,406                            | \$176                                             | 40                                   | 51  | Yes                                         | 154.8                                  |
| Nicaragua                    |                                           | Latin America       | Lower middle               | \$1,905                            | \$174                                             | 60                                   | 33  | Yes                                         | 148.3                                  |

eTable A (continued). Economic and Health Indicators of Countries Examined

|                                  | Drug utilization data source <sup>a</sup> | Region <sup>b</sup> | Income (2020) <sup>b</sup> | GDP per capita (2020) <sup>b</sup> | Health expenditure per capita (2018) <sup>b</sup> | % of health expenditure <sup>b</sup> |     | Statins included in EML (2017) <sup>c</sup> | IHD mortality rate (2019) <sup>d</sup> |
|----------------------------------|-------------------------------------------|---------------------|----------------------------|------------------------------------|---------------------------------------------------|--------------------------------------|-----|---------------------------------------------|----------------------------------------|
|                                  |                                           |                     |                            |                                    |                                                   | Public                               | OOP |                                             |                                        |
| Kuwait                           | Retail only                               | MENA                | High                       | \$32,373                           | \$1,711                                           | 88                                   | 11  | -                                           | 108.5                                  |
| Saudi Arabia                     | Total market                              | MENA                | High                       | \$20,110                           | \$1,485                                           | 62                                   | 14  | -                                           | 205.6                                  |
| United Arab Emirates             | Retail only                               | MENA                | High                       | \$43,103                           | \$1,817                                           | 52                                   | 13  | -                                           | 175.4                                  |
| Algeria                          | Retail only                               | MENA                | Lower middle               | \$3,310                            | \$256                                             | 66                                   | 33  | Yes                                         | 237.3                                  |
| Egypt                            | Retail only                               | MENA                | Lower middle               | \$3,548                            | \$126                                             | 29                                   | 62  | Yes                                         | 359.3                                  |
| Morocco                          | Retail only                               | MENA                | Lower middle               | \$3,009                            | \$175                                             | 40                                   | 47  | Yes                                         | 278.5                                  |
| Tunisia                          | Total market                              | MENA                | Lower middle               | \$3,320                            | \$252                                             | 57                                   | 39  | Yes                                         | 193.5                                  |
| Jordan                           | Retail only                               | MENA                | Upper middle               | \$4,283                            | \$330                                             | 49                                   | 31  | Yes                                         | 121.9                                  |
| Kazakhstan                       | Total market                              | MENA                | Upper middle               | \$9,056                            | \$276                                             | 61                                   | 33  | -                                           | 251.4                                  |
| Lebanon                          | Retail only                               | MENA                | Upper middle               | \$4,891                            | \$686                                             | 50                                   | 33  | Yes                                         | 241.2                                  |
| Turkey                           | Total market                              | MENA                | Upper middle               | \$8,538                            | \$390                                             | 77                                   | 17  | -                                           | 121.0                                  |
| Canada                           | Total market                              | North America       | High                       | \$43,242                           | \$4,995                                           | 73                                   | 15  | No                                          | 63.9                                   |
| United States                    | Total market                              | North America       | High                       | \$63,544                           | \$10,624                                          | 50                                   | 11  | -                                           | 91.0                                   |
| Bangladesh                       | Retail only                               | South Asia          | Lower middle               | \$1,969                            | \$42                                              | 17                                   | 74  | No                                          | 111.2                                  |
| India                            | Total market                              | South Asia          | Lower middle               | \$1,901                            | \$73                                              | 27                                   | 63  | Yes                                         | 150.5                                  |
| Pakistan                         | Retail only                               | South Asia          | Lower middle               | \$1,194                            | \$43                                              | 36                                   | 56  | Yes                                         | 189.3                                  |
| Sri Lanka                        | Retail only                               | South Asia          | Lower middle               | \$3,682                            | \$157                                             | 41                                   | 51  | Yes                                         | 109.0                                  |
| South Africa                     | Total market                              | Sub-Saharan Africa  | Upper middle               | \$5,091                            | \$526                                             | 54                                   | 8   | Yes                                         | 81.4                                   |
| West Africa <sup>g</sup>         | Retail only                               |                     |                            |                                    |                                                   |                                      |     |                                             |                                        |
| Gabon                            |                                           | Sub-Saharan Africa  | Upper middle               | \$7,006                            | \$218                                             | 59                                   | 23  | -                                           | 117.4                                  |
| Benin                            |                                           | Sub-Saharan Africa  | Lower middle               | \$1,291                            | \$31                                              | 20                                   | 45  | -                                           | 113.1                                  |
| Cameroon                         |                                           | Sub-Saharan Africa  | Lower middle               | \$1,499                            | \$54                                              | 6                                    | 76  | -                                           | 115.5                                  |
| Côte d'Ivoire                    |                                           | Sub-Saharan Africa  | Lower middle               | \$2,326                            | \$72                                              | 29                                   | 39  | -                                           | 122.0                                  |
| Senegal                          |                                           | Sub-Saharan Africa  | Lower middle               | \$1,488                            | \$59                                              | 24                                   | 56  | -                                           | 117.6                                  |
| Burkina Faso                     |                                           | Sub-Saharan Africa  | Low                        | \$831                              | \$40                                              | 43                                   | 36  | -                                           | 130.2                                  |
| Chad                             |                                           | Sub-Saharan Africa  | Low                        | \$614                              | \$29                                              | 17                                   | 62  | -                                           | 120.1                                  |
| Democratic Republic of the Congo |                                           | Sub-Saharan Africa  | Low                        | \$557                              | \$19                                              | 15                                   | 42  | -                                           | 114.7                                  |
| Guinea                           |                                           | Sub-Saharan Africa  | Low                        | \$1,194                            | \$38                                              | 16                                   | 61  | -                                           | 123.7                                  |
| Mali                             |                                           | Sub-Saharan Africa  | Low                        | \$859                              | \$35                                              | 28                                   | 34  | -                                           | 116.0                                  |
| Niger                            |                                           | Sub-Saharan Africa  | Low                        | \$565                              | \$30                                              | 33                                   | 49  | -                                           | 118.1                                  |
| Togo                             |                                           | Sub-Saharan Africa  | Low                        | \$915                              | \$42                                              | 17                                   | 56  | -                                           | 134.9                                  |

**Notes:** EML=essential medicines list, IHD=ischemic heart disease, MENA=Middle East and North Africa, OOP=out-of-pocket.

**a** Based on “sell-in” data or the volume purchased by retail (*e.g.*, pharmacies) or non-retail (*e.g.*, hospitals) sectors. As an exception, we used “sell-out” data, or the volume dispensed to patients, in the United Kingdom. We present data on the total market, or retail and non-retail drug sales, for 52 countries. In the 39 countries lacking non-retail sector data, utilization was estimated by interpolation, using the ratio of statin consumption in the retail and non-retail sectors for other countries in their region for which data was available. In 2020, 85% of statins were dispensed via retail sectors (based on countries with data for retail and non-retail sectors). **b** World Bank. **c** World Health Organization. **d** Global Burden Disease, age-standardized IHD mortality rate. **e** Republic of China (Taiwan), Statistical Bureau. **f** Australian Department of Foreign Affairs & Trade, Venezuela Fact Sheet. **g** IQVIA does not provide country specific utilization for this region.

**eTable B.** Statin Utilization in Pre- and Post-COVID-19, October 2019 to September 2020

| Countries/Regions <sup>b</sup> | Statin utilization, No.                       |                                   | <i>p</i>    | Growth,<br>% |
|--------------------------------|-----------------------------------------------|-----------------------------------|-------------|--------------|
|                                | (DDD per 1000 population ≥ 40 y) <sup>a</sup> |                                   |             |              |
|                                | Pre-COVID-19<br>(10/19 to 03/20)              | Post-COVID-19<br>(04/20 to 09/20) |             |              |
| Denmark                        | 331.7                                         | 326.1                             | 0.73        | -1.7         |
| Canada                         | 322.9                                         | 314.3                             | 0.68        | -2.7         |
| United Kingdom                 | 324.5                                         | 308.8                             | 0.14        | -4.8         |
| <b>Australia</b>               | <b>327.5</b>                                  | <b>265.2</b>                      | <b>0.26</b> | <b>-19.0</b> |
| <b>Norway</b>                  | <b>304.7</b>                                  | <b>274.4</b>                      | <b>0.26</b> | <b>-9.9</b>  |
| United States                  | 271.6                                         | 271.2                             | .98         | -0.1         |
| <b>Ireland</b>                 | <b>280.3</b>                                  | <b>257.8</b>                      | <b>0.38</b> | <b>-8.0</b>  |
| Sweden                         | 265.0                                         | 255.5                             | 0.61        | -3.6         |
| <b>New Zealand</b>             | <b>275.3</b>                                  | <b>243.6</b>                      | <b>0.74</b> | <b>-11.5</b> |
| Greece                         | 250.5                                         | 253.7                             | 0.33        | 1.3          |
| Slovenia                       | 250.8                                         | 256.1                             | 0.55        | 2.1          |
| <b>Belgium</b>                 | <b>271.5</b>                                  | <b>243.0</b>                      | <b>0.14</b> | <b>-10.5</b> |
| Czech Republic                 | 241.7                                         | 248.3                             | 0.15        | 2.7          |
| Finland                        | 253.0                                         | 243.2                             | 0.47        | -3.9         |
| Netherlands                    | 248.8                                         | 237.9                             | 0.22        | -4.4         |
| Lebanon                        | 201.9                                         | 232.4                             | 0.17        | 15.1         |
| <b>Poland</b>                  | <b>241.2</b>                                  | <b>202.5</b>                      | <b>0.32</b> | <b>-16.0</b> |
| <b>Austria</b>                 | <b>223.5</b>                                  | <b>190.8</b>                      | <b>0.18</b> | <b>-14.7</b> |
| <b>Portugal</b>                | <b>205.4</b>                                  | <b>184.8</b>                      | <b>0.43</b> | <b>-10.0</b> |
| Spain                          | 188.6                                         | 180.1                             | 0.51        | -4.5         |
| <b>Luxembourg</b>              | <b>198.1</b>                                  | <b>176.2</b>                      | <b>0.21</b> | <b>-11.0</b> |
| <b>Latvia</b>                  | <b>193.1</b>                                  | <b>174.8</b>                      | <b>0.40</b> | <b>-9.5</b>  |
| <b>Hungary</b>                 | <b>192.9</b>                                  | <b>175.0</b>                      | <b>0.30</b> | <b>-9.3</b>  |
| <b>Switzerland</b>             | <b>202.8</b>                                  | <b>170.1</b>                      | <b>0.15</b> | <b>-16.1</b> |
| <b>Germany</b>                 | <b>180.6</b>                                  | <b>160.6</b>                      | <b>0.27</b> | <b>-11.1</b> |
| <b>Slovak Republic</b>         | <b>175.5</b>                                  | <b>155.2</b>                      | <b>0.09</b> | <b>-11.6</b> |
| Croatia                        | 156.5                                         | 158.3                             | 0.67        | 1.2          |
| <b>Estonia</b>                 | <b>174.5</b>                                  | <b>148.9</b>                      | <b>0.39</b> | <b>-14.7</b> |
| France                         | 145.8                                         | 141.8                             | 0.17        | -2.7         |
| <b>Italy</b>                   | <b>144.7</b>                                  | <b>135.1</b>                      | <b>0.52</b> | <b>-6.6</b>  |
| <b>Romania</b>                 | <b>141.6</b>                                  | <b>125.4</b>                      | <b>0.34</b> | <b>-11.4</b> |
| Argentina                      | 108.7                                         | 130.2                             | 0.03        | 19.8         |
| Uruguay                        | 116.1                                         | 118.1                             | 0.35        | 1.8          |
| Algeria                        | 108.9                                         | 111.6                             | 0.88        | 2.5          |
| <b>Lithuania</b>               | <b>113.8</b>                                  | <b>106.0</b>                      | <b>0.52</b> | <b>-6.8</b>  |
| Brazil                         | 107.0                                         | 112.0                             | 0.25        | 4.7          |
| <b>Thailand</b>                | <b>102.6</b>                                  | <b>92.9</b>                       | <b>0.34</b> | <b>-9.4</b>  |
| Singapore                      | 96.6                                          | 93.4                              | 0.59        | -3.3         |
| Bulgaria                       | 94.0                                          | 90.8                              | 0.50        | -3.4         |
| South Korea                    | 90.5                                          | 91.4                              | 0.72        | 1.0          |
| Taiwan                         | 87.0                                          | 86.8                              | 0.96        | -0.2         |
| South Africa                   | 83.9                                          | 87.8                              | 0.64        | 4.6          |
| <b>United Arab Emirates</b>    | <b>92.7</b>                                   | <b>77.8</b>                       | <b>0.60</b> | <b>-16.1</b> |
| <b>Serbia</b>                  | <b>85.1</b>                                   | <b>78.7</b>                       | <b>0.25</b> | <b>-7.5</b>  |
| Saudi Arabia                   | 72.1                                          | 81.1                              | 0.26        | 12.4         |
| Turkey                         | 65.0                                          | 73.1                              | 0.04        | 12.4         |
| <b>Bosnia</b>                  | <b>70.5</b>                                   | <b>61.2</b>                       | <b>0.37</b> | <b>-13.2</b> |
| Russia                         | 58.6                                          | 66.2                              | 0.08        | 13.0         |
| <b>Tunisia</b>                 | <b>76.5</b>                                   | <b>52.7</b>                       | <b>0.05</b> | <b>-31.1</b> |
| <b>Malaysia</b>                | <b>65.9</b>                                   | <b>53.7</b>                       | <b>0.21</b> | <b>-18.6</b> |
| <b>Belarus</b>                 | <b>55.0</b>                                   | <b>51.0</b>                       | <b>0.25</b> | <b>-7.2</b>  |
| Japan                          | 53.2                                          | 54.1                              | 0.82        | 1.7          |
| Egypt                          | 51.4                                          | 53.3                              | 0.50        | 3.7          |
| Chile                          | 45.5                                          | 50.6                              | 0.25        | 11.4         |
| Sri Lanka                      | 44.5                                          | 50.0                              | 0.14        | 12.4         |
| Dominican Republic             | 44.7                                          | 44.7                              | 0.00        | 0.0          |
| Kuwait                         | 26.3                                          | 27.7                              | 0.84        | 5.4          |
| <b>Ukraine</b>                 | <b>32.1</b>                                   | <b>26.1</b>                       | <b>0.22</b> | <b>-18.7</b> |
| <b>Jordan</b>                  | <b>28.7</b>                                   | <b>24.1</b>                       | <b>0.50</b> | <b>-16.1</b> |
| Kazakhstan                     | 22.8                                          | 22.9                              | 0.97        | 0.8          |
| Bangladesh                     | 20.9                                          | 24.9                              | 0.17        | 19.3         |

**eTable B (continued).** Statin Utilization in Pre- and Post-COVID-19, October 2019 to September 2020

| Countries/Regions <sup>b</sup>    | Statin utilization, No.<br>(DDD per 1000 population ≥ 40 y) <sup>a</sup> |                                   |             | p            | Growth,<br>% |
|-----------------------------------|--------------------------------------------------------------------------|-----------------------------------|-------------|--------------|--------------|
|                                   | Pre-COVID-19<br>(10/19 to 03/20)                                         | Post-COVID-19<br>(04/20 to 09/20) |             |              |              |
|                                   | <b>Mexico</b>                                                            | <b>28.4</b>                       | <b>23.8</b> |              |              |
| <b>Philippines</b>                | <b>23.2</b>                                                              | <b>21.3</b>                       | <b>0.54</b> | <b>-8.1</b>  |              |
| Ecuador                           | 18.1                                                                     | 22.3                              | 0.30        | 23.6         |              |
| Pakistan                          | 20.4                                                                     | 19.4                              | 0.40        | -4.8         |              |
| China                             | 16.2                                                                     | 18.3                              | 0.17        | 13.3         |              |
| <b>Vietnam</b>                    | <b>23.3</b>                                                              | <b>17.2</b>                       | <b>0.38</b> | <b>-26.3</b> |              |
| Central America <sup>c, d</sup>   | 16.1                                                                     | 16.7                              | 0.75        | 4.0          |              |
| Colombia                          | 14.3                                                                     | 17.3                              | 0.08        | 20.7         |              |
| <b>Morocco</b>                    | <b>15.5</b>                                                              | <b>15.1</b>                       | <b>0.75</b> | <b>-3.1</b>  |              |
| India                             | 13.7                                                                     | 14.3                              | <0.01       | 4.3          |              |
| <b>Venezuela</b>                  | <b>14.5</b>                                                              | <b>14.4</b>                       | <b>0.95</b> | <b>-0.9</b>  |              |
| Peru                              | 5.9                                                                      | 10.3                              | 0.41        | 74.7         |              |
| <b>Indonesia</b>                  | <b>10.9</b>                                                              | <b>8.9</b>                        | <b>0.32</b> | <b>-18.3</b> |              |
| <b>West Africa<sup>c, e</sup></b> | <b>4.0</b>                                                               | <b>2.8</b>                        | <b>0.04</b> | <b>-30.1</b> |              |

**Notes:** DDD=defined daily doses; No.=number.

**a** Statistical significance was determined using simple linear regression. Countries in bold declined  $\geq 5\%$ . **b** Sorted based on statin utilization in 2020, refer to **Error! Reference source not found.** **c** IQVIA does not provide country specific utilization for this region. **d** Central American countries included Costa Rica, El Salvador, Honduras, Guatemala, Nicaragua, and Panama. **e** West African countries included Benin, Burkina Faso, Cameroon, Chad, Democratic Republic of the Congo, Gabon, Guinea, Ivory Coast, Mali, Niger, Senegal, and Togo.
